# Supplementary material for: Highly effective and selective FeBr3-promoted deuterium bromination/cyclization of 1,n-enynes
Source: Royal Society of Chemistry journal article supplement (doi:10.1039/d3ob01778h), 2024-01-01

**Highly effective and selective FeBr<sub>3</sub>-promoted deuterium  
bromination/cyclization of 1,n-enynes**

**Supporting Information**

**Table of Contents**

|                                                                                              |            |
|----------------------------------------------------------------------------------------------|------------|
| <b>General remarks.....</b>                                                                  | <b>S2</b>  |
| <b>General procedure for deuterium bromination/cyclization of enynes.....</b>                | <b>S2</b>  |
| <b>Characterization data of heterocyclic alkenyl bromide/chloride.....</b>                   | <b>S2</b>  |
| <b>Gram-scale reaction.....</b>                                                              | <b>S12</b> |
| <b>Transformation of alkenyl bromide.....</b>                                                | <b>S13</b> |
| <b>General procedure for hydrobromination/cyclization of enynes with H<sub>2</sub>O.....</b> | <b>S14</b> |
| <b>Crystal structure of 2d and 2k.....</b>                                                   | <b>S15</b> |
| <b>References.....</b>                                                                       | <b>S18</b> |
| <b>NMR spectra.....</b>                                                                      | <b>S19</b> |

## General remarks

All the manipulations were performed in air, unless mentioned otherwise. THF, toluene, and hexane were purchased from J&K Chemicals and used without further purification. The following chemicals were purchased and used as received: FeBr<sub>3</sub> (99%, Sigma-Aldrich), D<sub>2</sub>O (Energy Chemicals), DCE (J&K Chemical and *de*-water). All enynes were prepared by literature report procedures<sup>1</sup>.

<sup>1</sup>H, <sup>13</sup>C, <sup>9</sup>F NMR spectra were recorded using Bruker 400 MHz, 500 MHz and 600 MHz NMR, Agilent Technologies 600 MHz NMR spectrometer. <sup>1</sup>H NMR and <sup>13</sup>C NMR spectra were referenced to resonances of the residual protons in the deuterated solvents. Multiplicities are recorded as: s = singlet, d = doublet, t = triplet, dd = doublet of doublets, dt = doublet of triplets, br = broad singlet and m = multiplet. HR-MS analyses were performed at a Thermo Scientific Exactive-TOF (ESI ionization source).

## General procedure for evaluation of conditions.

In a 4-mL screw-capped vial, **1a** (67.8 mg, 0.2 mmol), FeBr<sub>3</sub> (70.9 mg, 0.24 mol), solvent (0.5 mL) and a magnetic stirring bar were added under air. Then D<sub>2</sub>O (4.8 mg, 0.24 mmol) were added. The vial was sealed with a cap containing a PTFE septum, then transferred to an oil bath at 80 °C. The reaction mixture was stirred at 80 °C for 1 h and the resulting solution was concentrated in vacuum. Conversions and Z/E ratio were determined by NMR analysis with crude reaction mixture.

## General procedure for deuterium bromination/cyclization of enynes

In a 4-mL screw-capped vial, **1a** (101.7 mg, 0.3 mmol), FeBr<sub>3</sub> (106.4 mg, 0.36 mol), solvent (0.5 mL) and a magnetic stirring bar were added under air. Then D<sub>2</sub>O (7.2 mg, 0.36 mmol) were added. The vial was sealed with a cap containing a PTFE septum, then transferred to an oil bath at 80 °C. The reaction mixture was stirred at 80 °C for 1 h and the resulting solution was concentrated in vacuum. The crude product was purified by column chromatography on silica gel with a mixture of ethyl acetate and hexane (1:70 - 1:2) as eluent, and data for characterization of the products are listed below.

## Characterization data of heterocyclic alkenyl bromide

### (Z)-4-(bromo(phenyl)methylene)-3-methyl-3-(methyl-d)-1-tosylpyrrolidine (**2a**)

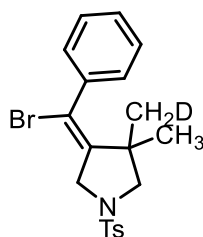

**2a**

The title compound was isolated (112.5 mg, 89%) as a white solid after flash chromatography on silica gel (Hexane/EtOAc = 50:1). <sup>1</sup>H NMR (600 MHz, CDCl<sub>3</sub>) δ 7.75 (d, *J* = 8.3 Hz, 2H), 7.38 (d, *J* = 8.0 Hz, 2H), 7.33 – 7.30 (m, 3H), 7.21 (dd, *J* = 7.4, 2.2 Hz, 2H), 4.00 (s, 2H), 3.03 (s, 2H), 2.47 (s, 3H), 0.90 (s, 3H), 0.89 (m, 2H). <sup>13</sup>C NMR (151 MHz, CDCl<sub>3</sub>) δ 144.5, 144.0, 139.6, 132.1, 129.9, 129.0, 128.8, 128.3, 128.1, 115.8, 63.2, 56.6, 44.2, 26.1, 25.8 (t, *J* = 19.6 Hz), 21.7. HRMS (ESI): *m/z* [M+H]<sup>+</sup> calcd for C<sub>20</sub>H<sub>22</sub>DBrNO<sub>2</sub>S<sup>+</sup>: 426.0690, found 420.0692.

**(Z)-4-(bromo(4-fluorophenyl)methylene)-3-methyl-3-(methyl-d)-1-tosylpyrrolidine (2b)**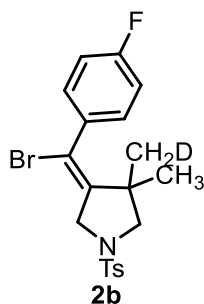

The title compound was isolated (92.3 mg, 70%) as a white solid after flash chromatography on silica gel (Hexane/EtOAc = 50:1).  $^1\text{H}$  NMR (600 MHz,  $\text{CDCl}_3$ )  $\delta$  7.75 (d,  $J$  = 6.0 Hz, 2H), 7.39 (d,  $J$  = 6.0 Hz, 2H), 7.21 – 7.19 (m, 2H), 7.01 (t,  $J$  = 8.7 Hz, 2H), 3.99 (s, 2H), 3.03 (s, 2H), 2.47 (s, 3H), 0.90 (s, 3H), 0.89 (m, 2H).  $^{13}\text{C}$  NMR (151 MHz,  $\text{CDCl}_3$ )  $\delta$  162.7 (d,  $J$  = 249.6 Hz), 145.5, 144.0, 135.8 (d,  $J$  = 3.8 Hz), 132.2, 131.0 (d,  $J$  = 8.2 Hz), 129.9, 128.2, 115.5 (d,  $J$  = 21.8 Hz), 114.7, 63.1, 56.5, 44.1, 26.1, 25.8 (t,  $J$  = 18.1 Hz), 21.6.  $^{19}\text{F}$  NMR (565 MHz,  $\text{CDCl}_3$ )  $\delta$  -111.68. HRMS (ESI):  $m/z$   $[\text{M}+\text{H}]^+$  calcd for  $\text{C}_{20}\text{H}_{21}\text{DBrFNO}_2\text{S}^+$ : 439.0596, found 439.0594.

**(Z)-4-(bromo(4-chlorophenyl)methylene)-3-methyl-3-(methyl-d)-1-tosylpyrrolidine (2c)**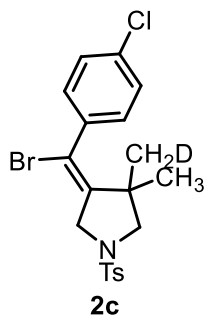

The title compound was isolated (94.3 mg, 69%) as a white solid after flash chromatography on silica gel (Hexane/EtOAc = 50:1).  $^1\text{H}$  NMR (400 MHz,  $\text{CDCl}_3$ )  $\delta$  7.74 (d,  $J$  = 8.3 Hz, 2H), 7.38 (d,  $J$  = 8.1 Hz, 2H), 7.29 (dd,  $J$  = 8.7, 2.4 Hz, 2H), 7.15 (d,  $J$  = 8.5 Hz, 2H), 3.98 (s, 2H), 3.02 (s, 2H), 2.46 (s, 3H), 0.91 (s, 3H), 0.89 (m, 2H).  $^{13}\text{C}$  NMR (101 MHz,  $\text{CDCl}_3$ )  $\delta$  145.5, 144.0, 138.1, 134.8, 132.0, 130.4, 129.9, 128.7, 128.2, 114.3, 63.2, 56.6, 44.2, 26.2, 25.9 (t,  $J$  = 19.2 Hz), 21.7. HRMS (ESI):  $m/z$   $[\text{M}+\text{H}]^+$  calcd for  $\text{C}_{20}\text{H}_{21}\text{DBrClNO}_2\text{S}^+$ : 455.0300, found 455.0298.

**(Z)-4-(bromo(4-bromophenyl)methylene)-3-methyl-3-(methyl-d)-1-tosylpyrrolidine (2d)**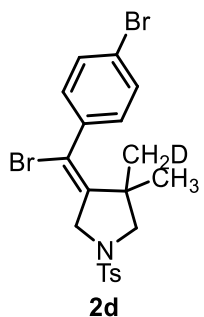

The title compound was isolated (115.6 mg, 77%) as a white solid after flash chromatography on silica gel (Hexane/EtOAc = 50:1).  $^1\text{H}$  NMR (400 MHz,  $\text{CDCl}_3$ )  $\delta$  7.74 (d,  $J$  = 8.3 Hz, 2H), 7.49 – 7.42 (m, 2H), 7.38 (d,  $J$  = 8.3 Hz, 2H), 7.12 – 7.05 (m, 2H), 3.97 (s, 2H), 3.02 (s, 2H), 2.46 (s, 3H), 0.91 (s, 3H), 0.90 (d,  $J$  = 7.0 Hz, 2H).  $^{13}\text{C}$  NMR (101 MHz,  $\text{CDCl}_3$ )  $\delta$  145.5, 144.0, 138.5, 132.0, 131.6,

130.7, 129.9, 128.2, 123.1, 114.3, 63.2, 56.6, 44.2, 26.2, 25.9 (t,  $J = 20.2$  Hz), 21.7. HRMS (ESI):  $m/z$   $[M+H]^+$  calcd for  $C_{20}H_{21}DBr_2NO_2S^+$ : 498.9795, found 498.9795.

**(Z)-4-(bromo(*p*-tolyl)methylene)-3-methyl-3-(methyl-*d*)-1-tosylpyrrolidine (2e)**

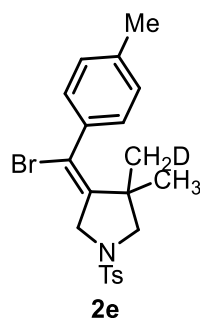

The title compound was isolated (86.2 mg, 66%) as a white solid after flash chromatography on silica gel (Hexane/EtOAc = 50:1).  $^1H$  NMR (400 MHz,  $CDCl_3$ )  $\delta$  7.79 – 7.69 (m, 2H), 7.42 – 7.35 (m, 2H), 7.17 – 7.05 (m, 4H), 3.98 (s, 2H), 3.02 (s, 2H), 2.47 (s, 3H), 2.34 (s, 3H), 1.60 (s, 3H), 0.91 (s, 3H), 0.90 (d,  $J = 7.1$  Hz, 2H).  $^{13}C$  NMR (101 MHz,  $CDCl_3$ )  $\delta$  144.4, 144.0, 138.9, 136.9, 132.2, 129.9, 129.0, 128.9, 128.2, 116.2, 63.3, 56.6, 44.2, 26.2, 21.6 (d,  $J = 31.2$  Hz). HRMS (ESI):  $m/z$   $[M+H]^+$  calcd for  $C_{21}H_{24}DBrNO_2S^+$ : 435.0847, found 435.0845.

**(Z)-4-(bromo(4-(*tert*-butyl)phenyl)methylene)-3-methyl-3-(methyl-*d*)-1-tosylpyrrolidine (2f)**

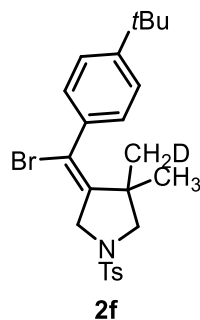

The title compound was isolated (87.3 mg, 61%) as a white solid after flash chromatography on silica gel (Hexane/EtOAc = 50:1).  $^1H$  NMR (600 MHz,  $CDCl_3$ )  $\delta$  7.75 (d,  $J = 8.0$  Hz, 2H), 7.38 (d,  $J = 8.0$  Hz, 2H), 7.32 (d,  $J = 8.2$  Hz, 2H), 7.13 (d,  $J = 8.1$  Hz, 2H), 3.99 (s, 2H), 3.03 (s, 2H), 2.47 (s, 3H), 1.30 (s, 9H), 0.90 (s, 3H), 0.90 (d,  $J = 10.5$  Hz, 2H).  $^{13}C$  NMR (151 MHz,  $CDCl_3$ )  $\delta$  152.1, 144.4, 143.9, 136.7, 132.3, 129.9, 128.7, 128.2, 125.2, 116.3, 63.3, 56.6, 44.2, 34.8, 31.4, 26.2, 25.9 (t,  $J = 19.6$  Hz), 21.8. HRMS (ESI):  $m/z$   $[M+H]^+$  calcd for  $C_{20}H_{30}DBrNO_2S^+$ : 477.1316, found 477.1314.

**(Z)-4-(bromo(4-(trifluoromethyl)phenyl)methylene)-3-methyl-3-(methyl-*d*)-1-tosylpyrrolidine (2g)**

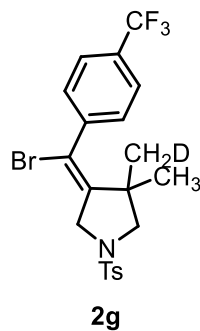

The title compound was isolated (121.8 mg, 83%) as a white solid after flash chromatography on silica gel (Hexane/EtOAc = 50:1).  $^1H$  NMR (400 MHz,  $CDCl_3$ )  $\delta$  7.75 (d,  $J = 8.3$  Hz,

2H), 7.60 (d,  $J = 8.4$  Hz, 2H), 7.40 (d,  $J = 8.3$  Hz, 2H), 7.35 (d,  $J = 8.3$  Hz, 2H), 4.01 (s, 2H), 3.05 (s, 2H), 2.48 (s, 3H), 0.91 (s, 3H), 0.90 (d,  $J = 7.0$  Hz, 2H).  $^{13}\text{C}$  NMR (101 MHz,  $\text{CDCl}_3$ )  $\delta$  146.0, 144.1, 143.1, 132.0, 131.0 (q,  $J = 32.3$  Hz), 130.0, 129.6, 128.2, 125.4 (q,  $J = 3.8$  Hz), 125.2, 122.5, 113.6, 63.2, 56.6, 44.3, 26.2, 25.9 (t,  $J = 19.2$  Hz), 21.7.  $^{19}\text{F}$  NMR (376 MHz,  $\text{CDCl}_3$ )  $\delta$  -62.77. HRMS (ESI):  $m/z$   $[\text{M}+\text{H}]^+$  calcd for  $\text{C}_{21}\text{H}_{21}\text{DBrF}_3\text{NO}_2\text{S}^+$ : 489.0564, found 489.0563.

**Methyl (Z)-4-(bromo(4-methyl-4-(methyl-d)-1-tosylpyrrolidin-3-ylidene)methyl)benzoate (2h)**

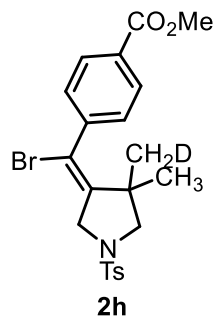

The title compound was isolated (128 mg, 89%) as a white solid after flash chromatography on silica gel (Hexane/EtOAc = 4:1).  $^1\text{H}$  NMR (600 MHz,  $\text{CDCl}_3$ )  $\delta$  8.01 – 7.97 (m, 2H), 7.76 – 7.71 (m, 2H), 7.38 (d,  $J = 7.9$  Hz, 2H), 7.31 – 7.27 (m, 2H), 4.00 (s, 2H), 3.90 (s, 3H), 3.03 (s, 2H), 2.46 (s, 3H), 0.89 (s, 3H), 0.88 (d,  $J = 10.5$  Hz, 2H).  $^{13}\text{C}$  NMR (151 MHz,  $\text{CDCl}_3$ )  $\delta$  166.4, 145.6, 144.03, 144.01, 132.1, 130.4, 129.9, 129.6, 129.2, 128.1, 114.1, 63.2, 56.6, 52.4, 44.2, 26.1, 25.9 (t,  $J = 19.6$  Hz), 21.7. HRMS (ESI):  $m/z$   $[\text{M}+\text{H}]^+$  calcd for  $\text{C}_{22}\text{H}_{24}\text{DBrNO}_4\text{S}^+$ : 479.0745, found 479.0745.

**(Z)-4-(bromo(3-methoxyphenyl)methylene)-3-methyl-3-(methyl-d)-1-tosylpyrrolidine (2i)**

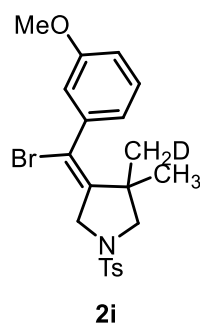

The title compound was isolated (79.9 mg, 59%) as a white solid after flash chromatography on silica gel (Hexane/EtOAc = 50:1).  $^1\text{H}$  NMR (400 MHz,  $\text{CDCl}_3$ )  $\delta$  7.78 – 7.71 (m, 2H), 7.39 (d,  $J = 8.1$  Hz, 2H), 7.24 (dd,  $J = 15.3, 7.4$  Hz, 1H), 6.88 – 6.77 (m, 2H), 6.74 (dd,  $J = 2.7, 1.6$  Hz, 1H), 3.99 (s, 2H), 3.78 (s, 3H), 3.03 (s, 2H), 2.47 (s, 3H), 0.93 (s, 3H), 0.93 (d,  $J = 7.1$  Hz, 2H).  $^{13}\text{C}$  NMR (101 MHz,  $\text{CDCl}_3$ )  $\delta$  159.2, 144.5, 144.0, 140.8, 132.1, 129.9, 129.4, 128.2, 121.5, 115.6, 114.6, 114.5, 63.2, 56.5, 55.4, 44.2, 26.1, 25.8 (t,  $J = 20.2$  Hz), 21.7. HRMS (ESI):  $m/z$   $[\text{M}+\text{H}]^+$  calcd for  $\text{C}_{21}\text{H}_{24}\text{DBrNO}_3\text{S}^+$ : 451.0796, found 451.0795.

**(Z)-4-(bromo(3-(trifluoromethyl)phenyl)methylene)-3-methyl-3-(methyl-d)-1-tosylpyrrolidine (2j)**

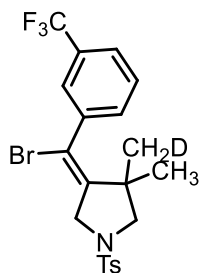**2j**

The title compound was isolated (91 mg, 62%) as a white solid after flash chromatography on silica gel (Hexane/EtOAc = 50:1).  $^1\text{H}$  NMR (400 MHz,  $\text{CDCl}_3$ )  $\delta$  7.77 – 7.71 (m, 2H), 7.60 – 7.54 (m, 1H), 7.49 – 7.43 (m, 2H), 7.43 – 7.35 (m, 3H), 4.00 (s, 2H), 3.03 (s, 2H), 2.46 (s, 3H), 0.88 (s, 3H), 0.88 (d,  $J$  = 7.0 Hz, 2H).  $^{13}\text{C}$  NMR (101 MHz,  $\text{CDCl}_3$ )  $\delta$  146.2, 144.1, 140.3, 132.4, 132.0, 130.8 (q,  $J$  = 32.3 Hz), 129.9, 129.0, 128.1, 126.0 (q,  $J$  = 4.0 Hz), 125.5 (q,  $J$  = 4.0 Hz), 123.7 (q,  $J$  = 273.7 Hz), 113.5, 63.2, 56.6, 44.2, 26.1, 25.9 (t,  $J$  = 19.2 Hz), 21.7.  $^{19}\text{F}$  NMR (565 MHz,  $\text{CDCl}_3$ )  $\delta$  -62.8. HRMS (ESI):  $m/z$   $[\text{M}+\text{H}]^+$  calcd for  $\text{C}_{21}\text{H}_{21}\text{DBrF}_3\text{NO}_2\text{S}^+$ : 489.0564, found 489.0563.

**Methyl (Z)-3-(bromo(4-methyl-4-(methyl-d)-1-tosylpyrrolidin-3-ylidene)methyl)benzoate (2k)**

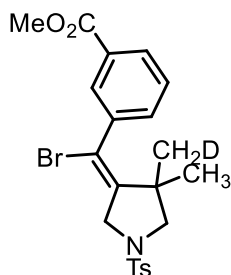**2k**

The title compound was isolated (93.4 mg, 67%) as a white solid after flash chromatography on silica gel (Hexane/EtOAc = 50:1).  $^1\text{H}$  NMR (400 MHz,  $\text{CDCl}_3$ )  $\delta$  7.98 (td,  $J$  = 4.3, 3.5, 1.9 Hz, 1H), 7.89 (s, 1H), 7.74 (d,  $J$  = 8.3 Hz, 2H), 7.46 – 7.34 (m, 4H), 4.00 (s, 2H), 3.90 (s, 3H), 3.02 (s, 2H), 2.47 (s, 3H), 0.89 (s, 3H), 0.88 (d,  $J$  = 7.1 Hz, 2H).  $^{13}\text{C}$  NMR (101 MHz,  $\text{CDCl}_3$ )  $\delta$  166.4, 145.6, 144.1, 139.9, 133.4, 131.9, 130.4, 130.2, 130.0, 129.9, 128.6, 128.1, 114.3, 63.2, 56.6, 52.4, 44.2, 26.3, 25.9 (t,  $J$  = 19.2 Hz), 21.7. HRMS (ESI):  $m/z$   $[\text{M}+\text{H}]^+$  calcd for  $\text{C}_{22}\text{H}_{24}\text{DBrNO}_4\text{S}^+$ : 479.0745, found 479.0745.

**(Z)-4-(bromo(o-tolyl)methylene)-3-methyl-3-(methyl-d)-1-tosylpyrrolidine (2l)**

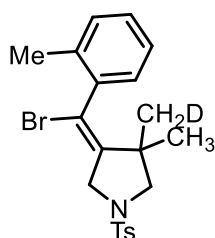**2l**

The title compound was isolated (84.9 mg, 65%) as a white solid after flash chromatography on silica gel (Hexane/EtOAc = 50:1).  $^1\text{H}$  NMR (400 MHz,  $\text{CDCl}_3$ )  $\delta$  7.75 (d,  $J$  = 8.0 Hz, 2H), 7.39 (d,  $J$  = 8.0 Hz, 2H), 7.27-7.21 (m, 1H), 6.86 - 6.79 (m, 2H), 6.75 - 6.74 (m, 1H), 3.99 (s, 2H), 3.78 (s, 3H), 3.03 (s, 2H), 2.47 (s, 3H), 0.93 (s, 3H), 0.92 (d,  $J$  = 7.2 Hz, 2H).  $^{13}\text{C}$  NMR (101 MHz,  $\text{CDCl}_3$ )  $\delta$  159.1, 144.3, 143.9, 140.7, 132.0, 129.8, 129.3, 128.1, 121.4, 115.5, 114.5, 114.4, 63.2, 56.4, 55.3,

44.1, 26.0, 25.7 (t,  $J = 20.2$  Hz), 21.6. HRMS (ESI):  $m/z$   $[M+H]^+$  calcd for  $C_{21}H_{24}DBrNO_2S^+$ : 435.0847, found 435.0847.

**(Z)-4-(bromo(2-fluorophenyl)methylene)-3-methyl-3-(methyl-*d*)-1-tosylpyrrolidine (2m)**

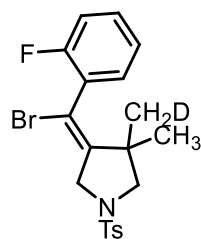

**2m**

The title compound was isolated (109.4 mg, 83%) as a white solid after flash chromatography on silica gel (Hexane/EtOAc = 50:1).  $^1H$  NMR (400 MHz,  $CDCl_3$ )  $\delta$  7.74 (d,  $J = 8.3$  Hz, 2H), 7.38 (d,  $J = 8.3$  Hz, 2H), 7.33 (tdd,  $J = 7.5, 5.3, 2.1$  Hz, 1H), 7.18 (td,  $J = 7.4, 2.1$  Hz, 1H), 7.11 (t,  $J = 7.4$  Hz, 1H), 7.04 (t,  $J = 8.9$  Hz, 1H), 4.12 (d,  $J = 15.5$  Hz, 1H), 3.89 (d,  $J = 15.5$  Hz, 1H), 3.15 (d,  $J = 8.9$  Hz, 1H), 2.92 (d,  $J = 8.9$  Hz, 1H), 2.47 (s, 3H), 1.01-0.79 (m, 5H).  $^{13}C$  NMR (101 MHz,  $CDCl_3$ )  $\delta$  159.2 (d,  $J = 249.2$  Hz), 147.3, 144.1, 132.0, 131.22, 131.20, 131.15, 130.0, 128.1, 127.1 (d,  $J = 16.3$  Hz), 124.1 (d,  $J = 3.6$  Hz), 116.1 (d,  $J = 21.4$  Hz), 108.4, 63.0, 56.4, 44.2, 26.8, 23.8, 21.7.  $^{19}F$  NMR (376 MHz,  $CDCl_3$ )  $\delta$  -112.01. HRMS (ESI):  $m/z$   $[M+H]^+$  calcd for  $C_{20}H_{21}DBrFNO_2S^+$ : 439.0596, found 439.0594.

**(Z)-3-(4-methyl-4-(methyl-*d*)-1-tosylpyrrolidin-3-ylidene)isobenzofuran-1(3H)-one (2n)**

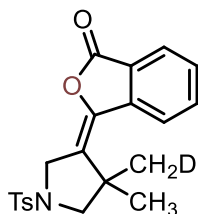

**2n**

The title compound was isolated (78.4 mg, 68%) as a white solid after flash chromatography on silica gel (Hexane/EtOAc = 50:1).  $^1H$  NMR (400 MHz,  $CDCl_3$ )  $\delta$  7.92 (dd,  $J = 7.6, 0.9$  Hz, 1H), 7.80 (d,  $J = 8.0$  Hz, 1H), 7.77 – 7.68 (m, 3H), 7.54 (t,  $J = 7.5$  Hz, 1H), 7.37 (d,  $J = 8.3$  Hz, 2H), 4.18 (s, 2H), 3.12 (s, 2H), 2.44 (s, 3H), 1.50 (s, 3H), 1.49 (d,  $J = 7.1$  Hz, 2H).  $^{13}C$  NMR (101 MHz,  $CDCl_3$ )  $\delta$  166.0, 144.3, 140.2, 136.3, 134.4, 131.2, 130.2, 129.9, 129.6, 128.4, 126.2, 126.1, 124.1, 63.9, 53.1, 41.3, 25.1, 24.8 (t,  $J = 20.2$  Hz), 21.7. HRMS (ESI):  $m/z$   $[M+H]^+$  calcd for  $C_{21}H_{21}DNO_4S^+$ : 385.1327, found 385.1326.

**4-(bromomethylene)-3-methyl-3-(methyl-*d*)-1-tosylpyrrolidine (2o)**

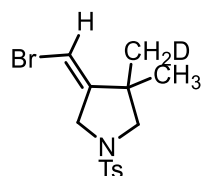

**2o**

The title compound was isolated (54.9 mg, 53%,  $Z/E = 2:1$ ) as a white solid after flash chromatography on silica gel (Hexane/EtOAc = 50:1).  $^1H$  NMR (600 MHz,  $CDCl_3$ )  $\delta$  7.66 (dd,  $J = 8.3, 2.5$  Hz, 2H), 7.34 (d,  $J = 8.1$  Hz, 2H), 5.86, 5.64 (s, 1H), 3.66 (d,  $J = 1.9$  Hz), 3.58 (d,  $J = 1.9$  Hz, 2H), 2.83 (d,  $J = 10.6$  Hz, 2H), 2.43 (s, 3H), 1.08 (s, 3H), 1.11 – 1.01 (m, 2H).  $^{13}C$  NMR (151 MHz,  $CDCl_3$ )  $\delta$  144.0, 137.4, 133.3, 129.9, 127.7, 124.8, 113.8, 54.3, 50.9, 49.1, 26.5, 26.1 (t,  $J = 19.6$  Hz), 21.7. HRMS (ESI):  $m/z$   $[M+H]^+$  calcd for  $C_{14}H_{18}DBrNO_2S^+$ : 345.0377, found 345.0378.



**(Z)-4-(bromo(phenyl)methylene)-3-(methyl-d)-3-phenyl-1-tosylpyrrolidine (2p)**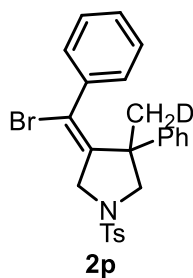

The title compound was isolated (104.4 mg, 72%) as a white solid after flash chromatography on silica gel (Hexane/EtOAc = 50:1).  $^1\text{H}$  NMR (600 MHz,  $\text{CDCl}_3$ )  $\delta$  7.71 (d,  $J$  = 8.1 Hz, 2H), 7.36 (d,  $J$  = 8.0 Hz, 2H), 7.13 (dt,  $J$  = 4.8, 2.7 Hz, 3H), 7.07 (t,  $J$  = 7.5 Hz, 1H), 7.03 – 6.96 (m, 4H), 6.79 – 6.70 (m, 2H), 4.22 (d,  $J$  = 3.0 Hz, 2H), 3.50 (d,  $J$  = 9.3 Hz, 1H), 3.29 (d,  $J$  = 9.3 Hz, 1H), 2.48 (s, 3H), 1.30 – 1.25 (m, 2H).  $^{13}\text{C}$  NMR (151 MHz,  $\text{CDCl}_3$ )  $\delta$  145.2, 144.7, 144.0, 138.9, 132.3, 129.9, 128.7, 128.31, 128.29, 128.1, 127.8, 126.8, 126.5, 117.9, 65.4, 57.3, 50.9, 23.9, 23.6 (t,  $J$  = 21.1 Hz), 21.8. HRMS (ESI):  $m/z$   $[\text{M}+\text{H}]^+$  calcd for  $\text{C}_{25}\text{H}_{23}\text{DBrNO}_2\text{S}^+$ : 483.0841, found 483.0841.

**(Z)-4-(bromo(thiophen-2-yl)methylene)-3-(methyl-d)-3-phenyl-1-tosylpyrrolidine (2q)**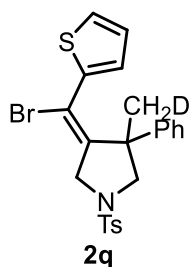

The title compound was isolated (71.8 mg, 56%) as a white solid after flash chromatography on silica gel (Hexane/EtOAc = 50:1).  $^1\text{H}$  NMR (400 MHz,  $\text{CDCl}_3$ )  $\delta$  7.79 – 7.68 (m, 2H), 7.38 (d,  $J$  = 8.1 Hz, 2H), 7.30 – 7.26 (m, 1H), 7.19 (dd,  $J$  = 3.1, 1.4 Hz, 1H), 7.02 – 6.88 (m, 1H), 3.97 (s, 2H), 3.03 (s, 2H), 2.47 (s, 3H), 0.96 (s, 5H).  $^{13}\text{C}$  NMR (101 MHz,  $\text{CDCl}_3$ )  $\delta$  146.3, 144.0, 139.2, 132.1, 129.9, 128.4, 128.2, 125.8, 125.1, 110.3, 63.2, 56.6, 44.3, 26.0, 25.7 (m), 21.8. HRMS (ESI):  $m/z$   $[\text{M}+\text{H}]^+$  calcd for  $\text{C}_{18}\text{H}_{20}\text{DBrNO}_2\text{S}_2^+$ : 427.0254, found 427.0255.

**(4-methyl-4-(methyl-d)-1-tosylpiperidin-3-yl)(phenyl)methanone (2r)**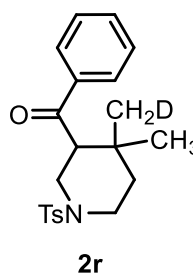

The title compound was isolated (80.9 mg, 62%) as a white solid after flash chromatography on silica gel (Hexane/EtOAc = 50:1).  $^1\text{H}$  NMR (600 MHz,  $\text{CDCl}_3$ )  $\delta$  7.94 – 7.88 (m, 2H), 7.68 – 7.61 (m, 2H), 7.60 – 7.55 (m, 1H), 7.49 – 7.43 (m, 2H), 7.33 (d,  $J$  = 8.2 Hz, 2H), 3.73 – 3.59 (m, 2H), 2.82 – 2.73 (m, 1H), 2.55 – 2.47 (m, 1H), 2.44 (s, 3H), 1.76 (td,  $J$  = 13.2, 4.7 Hz, 1H), 1.49 – 1.41 (m, 1H), 0.85 (s, 3H), 0.84 (d,  $J$  = 21.3 Hz, 5H), 0.83 (d,  $J$  = 24.0 Hz, 1H).  $^{13}\text{C}$  NMR (151 MHz,  $\text{CDCl}_3$ )  $\delta$  201.5, 143.7, 138.30, 138.26, 133.5, 133.3, 129.9, 128.8, 128.4, 127.8, 50.9, 50.6 – 49.7 (m), 44.6, 42.5, 40.0, 32.5, 31.2, 21.7, 19.8. HRMS (ESI):  $m/z$   $[\text{M}+\text{H}]^+$  calcd for  $\text{C}_{21}\text{H}_{24}\text{DNO}_3\text{SNa}^+$ : 395.1510, found 395.1504.

**(Z)-4-(bromo(naphthalen-2-yl)methylene)-3-methyl-3-(methyl-d)-1-tosylpyrrolidine (2s)**

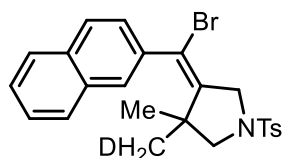**2s**

The title compound was isolated (60.8 mg, 43%) as a white solid after flash chromatography on silica gel (Hexane/EtOAc = 50:1).  $^1\text{H}$  NMR (600 MHz,  $\text{CDCl}_3$ )  $\delta$  7.85 – 7.78 (m, 3H), 7.78 – 7.74 (m, 2H), 7.70 (d,  $J$  = 1.9 Hz, 1H), 7.53 – 7.48 (m, 2H), 7.40 (d,  $J$  = 8.2 Hz, 2H), 7.30 (dd,  $J$  = 8.4, 1.8 Hz, 1H), 4.06 (s, 2H), 3.05 (s, 2H), 2.48 (s, 3H), 0.93 (s, 3H), 0.92 (d,  $J$  = 10.6 Hz, 2H).  $^{13}\text{C}$  NMR (151 MHz,  $\text{CDCl}_3$ )  $\delta$  145.1, 144.0, 137.0, 133.1, 132.7, 132.3, 130.0, 128.4, 128.31, 128.26, 128.2, 127.9, 127.1, 126.8, 126.7, 116.1, 63.3, 56.7, 44.3, 29.8, 26.3, 21.8. HRMS (ESI):  $m/z$   $[\text{M}+\text{H}]^+$  calcd for  $\text{C}_{24}\text{H}_{23}\text{DNO}_3\text{SBrNa}^+$ : 493.0666, found 493.0665.

**(1S, 2R, 5R)-2-isopropyl-5-methylcyclohexyl 4-((Z)-bromo(4-methyl-4-(methyl-d)-1-tosyl)pyrrolidin-3-ylidene)methyl)benzoate (2t)**

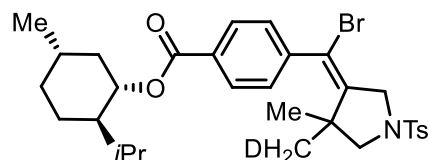**2t**

The title compound was isolated (114.1 mg, 63%) as a white solid after flash chromatography on silica gel (Hexane/EtOAc = 50:1).  $^1\text{H}$  NMR (600 MHz,  $\text{CDCl}_3$ )  $\delta$  7.99 (d,  $J$  = 8.4 Hz, 2H), 7.74 (d,  $J$  = 8.2 Hz, 2H), 7.38 (d,  $J$  = 8.2 Hz, 2H), 7.29 (d,  $J$  = 8.4 Hz, 2H), 4.92 (td,  $J$  = 10.9, 4.4 Hz, 1H), 4.01 (s, 2H), 3.04 (s, 2H), 2.47 (s, 3H), 2.10 (d,  $J$  = 11.7 Hz, 1H), 1.94 (td,  $J$  = 7.0, 2.9 Hz, 1H), 1.72 (dt,  $J$  = 11.6, 2.9 Hz, 2H), 1.56 – 1.52 (m, 2H), 1.15 – 1.05 (m, 2H), 0.91 (dd,  $J$  = 6.8, 3.4 Hz, 12H), 0.78 (d,  $J$  = 6.9 Hz, 3H).  $^{13}\text{C}$  NMR (151 MHz,  $\text{CDCl}_3$ )  $\delta$  165.5, 145.5, 144.0, 143.8, 132.2, 131.1, 129.9, 129.6, 129.1, 128.2, 114.3, 75.3, 63.2, 56.6, 47.3, 44.3, 41.1, 34.4, 31.6, 29.8, 26.6, 26.2 (dd,  $J$  = 7.6, 3.0 Hz), 23.7, 22.1, 21.7, 20.9, 16.5.

**(Z)-4-(bromo(4-methyl-4-(methyl-d)-1-tosylpyrrolidin-3-ylidene)methyl)phenyl 2-hydroxybenzoate (2u)**

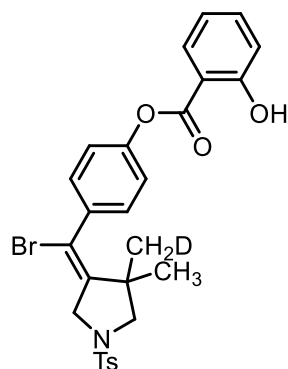**2u**

The title compound was isolated (113.7 mg, 68%) as a white solid after flash chromatography on silica gel (Hexane/EtOAc = 50:1).  $^1\text{H}$  NMR (600 MHz,  $\text{CDCl}_3$ )  $\delta$  10.4 (s, 1H), 8.04 (dd,  $J$  = 8.6, 1.6 Hz, 1H), 7.76 (d,  $J$  = 6.0 Hz, 2H), 7.56 – 7.53 (m, 1H), 7.39 (d,  $J$  = 9.0 Hz, 2H), 7.31 – 7.30 (m, 2H), 7.20 (d,  $J$  = 7.2 Hz, 2H), 7.04 (d,  $J$  = 7.8 Hz, 1H), 6.99 – 6.96 (m, 1H), 4.01 (s, 2H), 3.05 (s, 2H), 2.47 (s, 3H), 0.95 (s, 3H), 0.93 (d,  $J$  = 10.6 Hz, 2H).  $^{13}\text{C}$  NMR (151 MHz,  $\text{CDCl}_3$ )  $\delta$  168.6, 162.4, 150.2,

145.6, 144.0, 137.8, 136.8, 132.2, 130.5, 130.4, 129.9, 128.2, 121.7, 119.7, 118.0, 114.5, 111.7, 63.3, 56.6, 44.3, 26.3, 26.0 (t,  $J = 18.8$  Hz), 21.7.

**(Z)-4-(chloro(phenyl)methylene)-3-methyl-3-(methyl-d)-1-tosylpyrrolidine (2aa)**

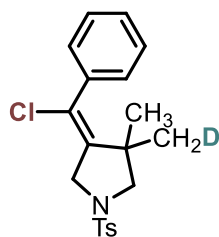

**2aa**

The title compound was isolated (91.4 mg, 81%) as a white solid after flash chromatography on silica gel (Hexane/EtOAc = 50:1).  $^1\text{H}$  NMR (600 MHz,  $\text{CDCl}_3$ )  $\delta$  7.74 (d,  $J = 8.2$  Hz, 2H), 7.38 (d,  $J = 8.0$  Hz, 2H), 7.34 – 7.31 (m, 3H), 7.24 – 7.21 (m, 2H), 4.05 (s, 2H), 3.00 (s, 2H), 2.46 (s, 3H), 0.91 (s, 3H), 0.90 (d,  $J = 10.5$  Hz, 2H).  $^{13}\text{C}$  NMR (151 MHz,  $\text{CDCl}_3$ )  $\delta$  144.0, 141.9, 137.8, 132.1, 129.9, 129.2, 129.0, 128.4, 128.2, 125.3, 63.1, 54.0, 43.2, 26.1, 25.9 (t,  $J = 19.6$  Hz), 21.7.

**(Z)-4-(chloro(p-tolyl)methylene)-3-methyl-3-(methyl-d)-1-tosylpyrrolidine (2ab)**

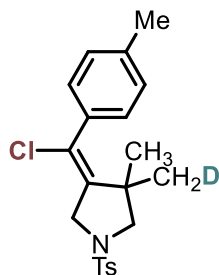

**2ab**

The title compound was isolated (63.2 mg, 54%) as a white solid after flash chromatography on silica gel (Hexane/EtOAc = 50:1).  $^1\text{H}$  NMR (600 MHz,  $\text{CDCl}_3$ )  $\delta$  7.74 (d,  $J = 8.2$  Hz, 2H), 7.38 (d,  $J = 8.0$  Hz, 2H), 7.15 – 7.09 (m, 4H), 4.03 (s, 2H), 2.99 (s, 2H), 2.47 (s, 3H), 2.35 (s, 3H), 0.91 (s, 3H), 0.90 (d,  $J = 10.5$  Hz, 2H).  $^{13}\text{C}$  NMR (126 MHz,  $\text{CDCl}_3$ )  $\delta$  143.9, 141.7, 139.0, 135.1, 132.3, 129.9, 129.12, 129.06, 128.2, 125.6, 63.1, 54.0, 43.3, 29.8, 26.2, 25.8 (t,  $J = 20.2$  Hz), 21.8, 21.4.

**(Z)-4-(chloro(4-chlorophenyl)methylene)-3-methyl-3-(methyl-d)-1-tosylpyrrolidine (2ac)**

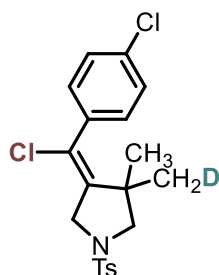

**2ac**

The title compound was isolated (93.5 mg, 76%) as a white solid after flash chromatography on silica gel (Hexane/EtOAc = 50:1).  $^1\text{H}$  NMR (600 MHz,  $\text{CDCl}_3$ )  $\delta$  7.73 (d,  $J = 8.3$  Hz, 2H), 7.38 (d,  $J = 7.9$  Hz, 2H), 7.33 – 7.29 (m, 2H), 7.18 – 7.15 (m, 2H), 4.02 (s, 2H), 2.99 (s, 2H), 2.46 (s, 3H), 0.91 (s, 3H), 0.90 (d,  $J = 10.5$  Hz, 2H).  $^{13}\text{C}$  NMR (151 MHz,  $\text{CDCl}_3$ )  $\delta$  144.0, 142.8, 136.3, 135.0, 132.1, 130.6, 129.9, 128.7, 128.2, 124.0, 63.0, 54.0, 43.3, 26.2, 25.9 (t,  $J = 21.1$  Hz), 21.7.

**methyl (Z)-4-(chloro(4-methyl-4-(methyl-d)-1-tosylpyrrolidin-3-ylidene)methyl)benzoate (2ad)**

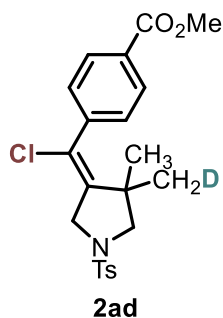

The title compound was isolated (101.6 mg, 78%) as a white solid after flash chromatography on silica gel (Hexane/EtOAc = 20:1).  $^1\text{H}$  NMR (600 MHz,  $\text{CDCl}_3$ )  $\delta$  8.01 – 7.97 (m, 2H), 7.75 – 7.70 (m, 2H), 7.37 (d,  $J$  = 8.0 Hz, 2H), 7.32 – 7.29 (m, 2H), 4.04 (s, 2H), 3.90 (s, 3H), 2.99 (s, 2H), 2.45 (s, 3H), 0.89 (s, 3H), 0.88 (d,  $J$  = 10.5 Hz, 2H).  $^{13}\text{C}$  NMR (126 MHz,  $\text{CDCl}_3$ )  $\delta$  166.4, 144.0, 142.9, 142.2, 132.0, 130.5, 130.0, 129.6, 129.3, 128.1, 123.8, 63.0, 54.0, 52.4, 43.2, 26.1, 25.8 (t,  $J$  = 18.9 Hz), 21.6.

**(Z)-4-(chloro(4-(trifluoromethyl)phenyl)methylene)-3-methyl-3-(methyl-d)-1-tosylpyrrolidine (2ae)**

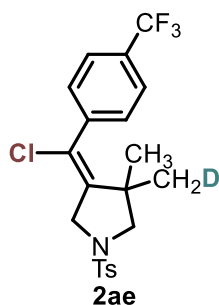

The title compound was isolated (121.2 mg, 91%) as a white solid after flash chromatography on silica gel (Hexane/EtOAc = 50:1).  $^1\text{H}$  NMR (600 MHz,  $\text{CDCl}_3$ )  $\delta$  7.77 – 7.71 (m, 2H), 7.61 (d,  $J$  = 8.1 Hz, 2H), 7.38 (dd,  $J$  = 12.3, 7.9 Hz, 4H), 4.06 (s, 2H), 3.01 (s, 2H), 2.47 (s, 3H), 0.91 (s, 3H), 0.90 (d,  $J$  = 10.3 Hz, 2H).  $^{13}\text{C}$  NMR (126 MHz,  $\text{CDCl}_3$ )  $\delta$  144.1, 143.4, 141.4 (d,  $J$  = 1.8 Hz), 132.1, 131.1 (q,  $J$  = 32.7 Hz), 130.0, 129.7, 128.2, 125.5 (q,  $J$  = 3.6 Hz), 123.8 (q,  $J$  = 272.5 Hz), 123.4, 63.0, 54.0, 43.3, 26.2, 26.0 (t,  $J$  = 20.2 Hz), 21.7.  $^{19}\text{F}$  NMR (376 MHz,  $\text{CDCl}_3$ )  $\delta$  -62.76.

**(Z)-4-(chloro(2-fluorophenyl)methylene)-3-methyl-3-(methyl-d)-1-tosylpyrrolidine (2af)**

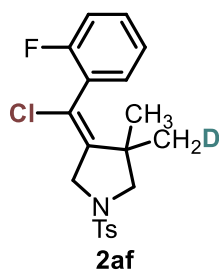

The title compound was isolated (70.9 mg, 60%) as a white solid after flash chromatography on silica gel (Hexane/EtOAc = 50:1).  $^1\text{H}$  NMR (600 MHz,  $\text{CDCl}_3$ )  $\delta$  7.74 (d,  $J$  = 7.9 Hz, 2H), 7.40 – 7.33 (m, 3H), 7.23 – 7.18 (m, 1H), 7.13 (t,  $J$  = 7.5 Hz, 1H), 7.06 (t,  $J$  = 8.9 Hz, 1H), 4.17 (d,  $J$  = 15.6 Hz, 1H), 3.94 (d,  $J$  = 15.6 Hz, 1H), 3.12 (d,  $J$  = 8.9 Hz, 1H), 2.89 (d,  $J$  = 8.9 Hz, 1H), 2.47 (s, 3H), 1.02 (d,  $J$  = 10.6 Hz) + 0.78 (d,  $J$  = 10.0 Hz) (5H).  $^{13}\text{C}$  NMR (126 MHz,  $\text{CDCl}_3$ )  $\delta$  159.6 (d,  $J$  = 248.9 Hz), 144.7, 144.0, 132.2, 131.5 (d,  $J$  = 2.3 Hz), 131.4 (d,  $J$  = 7.6 Hz), 130.0, 128.1, 125.4 (d,  $J$  = 15.9 Hz), 124.1 (d,  $J$  = 4.1 Hz), 118.75, 116.1 (d,  $J$  = 21.3 Hz), 62.9, 53.9, 43.4, 43.3, 29.8, 26.9, 26.5 (t,  $J$  = 18.9 Hz), 23.9, 23.60 (t,  $J$  = 18.9 Hz), 21.7.  $^{19}\text{F}$  NMR (377 MHz,  $\text{CDCl}_3$ )  $\delta$  -112.47.

**(Z)-4-(chloro(3-methoxyphenyl)methylene)-3-methyl-3-(methyl-d)-1-tosylpyrrolidine (2ag)**

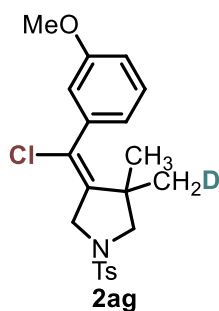

The title compound was isolated (70.0 mg, 55%) as a white solid after flash chromatography on silica gel (Hexane/EtOAc = 30:1).  $^1\text{H}$  NMR (600 MHz,  $\text{CDCl}_3$ )  $\delta$  7.74 (d,  $J$  = 8.2 Hz, 2H), 7.38 (d,  $J$  = 7.9 Hz, 2H), 7.23 (dd,  $J$  = 8.0, 3.5 Hz, 1H), 6.87 (ddd,  $J$  = 8.4, 2.6, 1.0 Hz, 1H), 6.82 (dt,  $J$  = 7.6, 1.2 Hz, 1H), 6.76 (dd,  $J$  = 2.6, 1.4 Hz, 1H), 4.04 (s, 2H), 3.78 (s, 3H), 3.00 (s, 2H), 2.46 (s, 3H), 0.94 (s, 3H), 0.93 (d,  $J$  = 10.6 Hz, 2H).  $^{13}\text{C}$  NMR (151 MHz,  $\text{CDCl}_3$ )  $\delta$  159.3, 144.0, 141.8, 139.0, 132.2, 129.9, 129.4, 128.2, 125.0, 121.6, 114.8, 114.6, 63.1, 55.4, 54.0, 43.4, 26.1, 25.8 (t,  $J$  = 18.1 Hz), 21.7.

**(Z)-4-(chloro(thiophen-3-yl)methylene)-3-(methyl-d)-1-tosylpyrrolidine (2ah)**

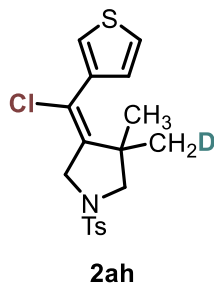

The title compound was isolated (50.4 mg, 44%) as a white solid after flash chromatography on silica gel (Hexane/EtOAc = 50:1).  $^1\text{H}$  NMR (600 MHz,  $\text{CDCl}_3$ )  $\delta$  7.75 – 7.71 (m, 2H), 7.38 (d,  $J$  = 8.0 Hz, 2H), 7.28 (dt,  $J$  = 4.5, 2.2 Hz, 1H), 7.22 (dd,  $J$  = 3.0, 1.3 Hz, 1H), 6.96 (dd,  $J$  = 5.0, 1.4 Hz, 1H), 4.02 (s, 2H), 3.00 (s, 2H), 2.46 (s, 3H), 0.96 (s, 3H), 0.95 (d,  $J$  = 10.6 Hz, 2H).  $^{13}\text{C}$  NMR (126 MHz,  $\text{CDCl}_3$ )  $\delta$  144.0, 143.5, 137.5, 132.2, 129.9, 128.3, 128.2, 125.9, 125.6, 120.2, 63.1, 54.1, 43.4, 29.8, 26.0, 25.7 (t,  $J$  = 18.9 Hz), 21.8.

**(Z)-4-(chloro(phenyl)methylene)-3-(methyl-d)-3-phenyl-1-tosylpyrrolidine (2ai)**

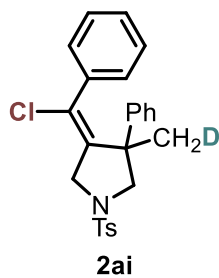

The title compound was isolated (67.0 mg, 51%) as a white solid after flash chromatography on silica gel (Hexane/EtOAc = 50:1).  $^1\text{H}$  NMR (600 MHz,  $\text{CDCl}_3$ )  $\delta$  7.73 – 7.69 (m, 2H), 7.36 (d,  $J$  = 7.9 Hz, 2H), 7.18 – 7.13 (m, 3H), 7.12 – 7.09 (m, 1H), 7.07 – 7.04 (m, 2H), 7.02 (t,  $J$  = 7.7 Hz, 2H), 6.82 – 6.77 (m, 2H), 4.30 – 4.23 (m, 2H), 3.48 (d,  $J$  = 9.3 Hz, 1H), 3.24 (d,  $J$  = 9.3 Hz, 1H), 2.47 (s, 3H), 1.28 (d,  $J$  = 9.7 Hz, 2H).  $^{13}\text{C}$  NMR (126 MHz,  $\text{CDCl}_3$ )  $\delta$  144.9, 144.0, 142.4, 137.2, 132.3, 129.9, 128.8, 128.5, 128.3, 128.1, 127.8, 127.2, 126.8, 126.5, 65.2, 54.8, 50.3, 29.8, 23.8, 23.6 (t,  $J$  = 20.2 Hz), 21.8.

**Gram-scale reaction**

In a 50-mL round bottle, **1a** (1.01 g, 3 mmol),  $\text{FeBr}_3$  (1.06 g, 3.6 mmol), solvent (10 mL) and a magnetic

stirring bar were added under air. Then D<sub>2</sub>O (72 mg, 3.6 mmol) were added. The vial was sealed with a cap containing a PTFE septum, then transferred to an oil bath at 80 °C. The reaction mixture was stirred at 80 °C for 2 h and the resulting solution was concentrated in vacuum. The crude product was purified by column chromatography on silica gel with a mixture of ethyl acetate and hexane (1:70-1:10) as eluent, and the desired product **2a** were obtained with 85% yield (1.07 g).

## Transformation of alkenyl bromide

### Procedure of Suzuki coupling of **2a** with benzo[*d*][1,3]dioxol-5-ylboronic acid

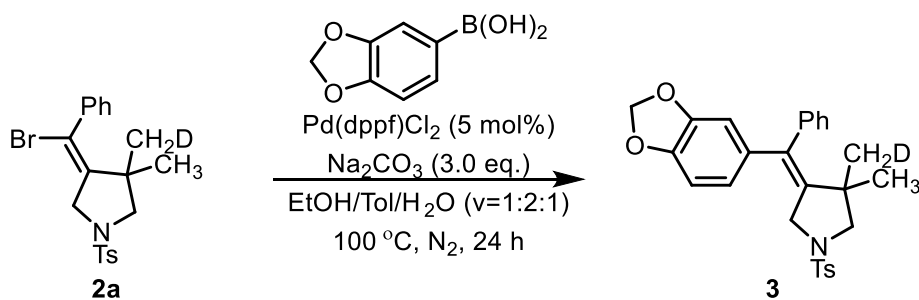

Prepared according to a previous reported method<sup>2</sup>. In a 10-mL Shrek tube, **2a** (84.2 mg, 0.2 mmol), benzo[*d*][1,3]dioxol-5-ylboronic acid (39.8 mg, 0.24 mmol), Pd(dppf)Cl<sub>2</sub> (7.31 mg, 0.01 mmol), Na<sub>2</sub>CO<sub>3</sub> (63.6 mg, 0.6 mmol), EtOH/toluene/H<sub>2</sub>O (v = 1:2:1, 1 mL) and a magnetic stirring bar were added under N<sub>2</sub>. The Shrek tube was transferred to an oil bath at 100 °C. The reaction mixture was stirred at 100 °C for 24 h and the resulting solution was concentrated in vacuum. The crude product was purified by column chromatography on silica gel with a mixture of ethyl acetate and hexane (1:20) as eluent, and data for characterization of the product **3** listed below.

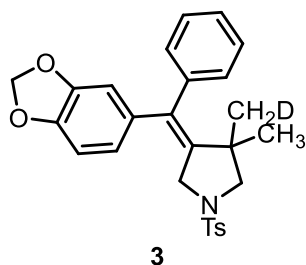

The title compound was isolated (70.3 mg, 76%) as a white solid after flash chromatography on silica gel (Hexane/EtOAc = 50:1). <sup>1</sup>H NMR (600 MHz, CDCl<sub>3</sub>) δ 7.66 (d, *J* = 7.9 Hz, 2H), 7.35 (d, *J* = 7.9 Hz, 2H), 7.27 – 7.23 (m, 2H), 7.22 – 7.18 (m, 1H), 7.13 – 7.09 (m, 2H), 6.71 (d, *J* = 8.6 Hz, 1H), 6.57 – 6.51 (m, 2H), 5.92 (s, 2H), 3.84 (s, 2H), 2.96 (s, 2H), 2.47 (s, 3H), 0.93 (s, 3H), 0.91 (s, 2H). <sup>13</sup>C NMR (151 MHz, CDCl<sub>3</sub>) δ 147.8, 146.5, 143.7, 141.4, 141.1, 136.8, 136.2, 132.4, 129.8, 128.9, 128.1, 128.0, 127.0, 120.9, 110.1, 108.6, 108.2, 101.1, 62.9, 52.8, 42.7, 26.79, 26.77, 21.7. HRMS (ESI): *m/z* [M+H]<sup>+</sup> calcd for C<sub>27</sub>H<sub>26</sub>DNO<sub>4</sub>S<sup>+</sup>: 485.1616, found 485.1612.

### Procedure of Sonogashira coupling of **2a** with phenylacetylene

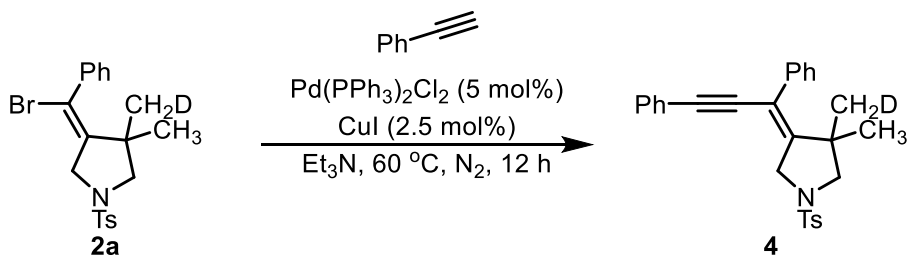

Prepared according to a previous reported method<sup>3</sup>. In a 10-mL Shrek tube, **2a** (84.2 mg, 0.2 mmol), Pd(PPh<sub>3</sub>)Cl<sub>2</sub> (7.02 mg, 0.01 mmol), CuI (0.95 mg, 0.005 mmol), Et<sub>3</sub>N (1 mL) and a magnetic stirring bar were added under N<sub>2</sub>. Then phenylacetylene (40.85 mg, 0.4 mmol) was added through a syringe. The Shrek tube was transferred to an oil bath at 60 °C. The reaction mixture was stirred at 60 °C for 12 h and the resulting solution was concentrated in vacuum. The crude product was purified by column chromatography on silica gel with a mixture of ethyl acetate and hexane (1:50) as eluent, and data for characterization of the product **4** listed below.

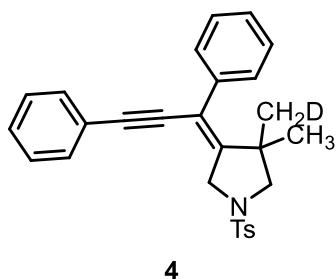**4**

The title compound was isolated (75.3 mg, 85%) as a white solid after

flash chromatography on silica gel (Hexane/EtOAc = 50:1). <sup>1</sup>H NMR (600 MHz, CDCl<sub>3</sub>) δ 7.76 (d, *J* = 7.9 Hz, 2H), 7.37 (d, *J* = 7.1 Hz, 4H), 7.35 – 7.28 (m, 5H), 7.27 – 7.22 (m, 3H), 4.26 (s, 2H), 3.01 (s, 2H), 2.46 (s, 3H), 0.94 (d, *J* = 10.7 Hz, 5H). <sup>13</sup>C NMR (101 MHz, CDCl<sub>3</sub>) δ 152.2, 143.9, 137.5, 132.5, 131.5, 129.9, 129.2, 128.5, 128.4, 128.3, 128.2, 127.8, 123.2, 117.6, 95.8, 88.8, 63.1, 54.5, 43.3, 26.30, 26.28, 21.7. HRMS (ESI): *m/z* [M+H]<sup>+</sup> calcd for C<sub>28</sub>H<sub>27</sub>DNO<sub>2</sub>S<sup>+</sup>: 443.1898, found 443.1896.

### Procedure of hydrobromination/cyclization of enynes with H<sub>2</sub>O

In a 4-mL screw-capped vial, **1a** (101.8 mg, 0.3 mmol), FeBr<sub>3</sub> (106.4 mg, 0.36 mol), DCE (1 mL) and a magnetic stirring bar were added under air. Then H<sub>2</sub>O (6.5 mg, 0.36 mmol) were added. The vial was sealed with a cap containing a PTFE septum, then transferred to an oil bath at 80 °C. The reaction mixture was stirred at 80 °C for 1 h and the resulting solution was concentrated in vacuum. The crude product was purified by column chromatography on silica gel with a mixture of ethyl acetate and hexane (1:50) as eluent, and data for characterization of the products are listed below.

### Characterization data of product **2a'**

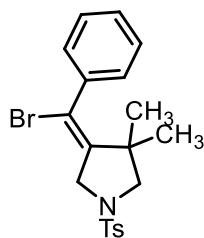**2a'**

The title compound was isolated (110.9 mg, 88%) as a white solid after flash chromatography on silica gel (Hexane/EtOAc = 70:1). <sup>1</sup>H NMR (400 MHz, CDCl<sub>3</sub>) δ 7.77 – 7.72 (m, 2H), 7.39 (d, *J* = 8.1 Hz, 2H), 7.31 (dd, *J* = 5.1, 2.0 Hz, 3H), 7.23 – 7.18 (m, 2H), 4.00 (s, 2H), 3.03 (s, 2H), 2.47 (s, 3H), 0.90 (s, 6H). <sup>13</sup>C NMR (101 MHz, CDCl<sub>3</sub>) δ 144.6, 144.0, 139.7, 132.1, 129.9, 129.1, 128.8, 128.3, 128.2, 115.9, 63.3, 56.6, 44.2, 26.2, 21.8.

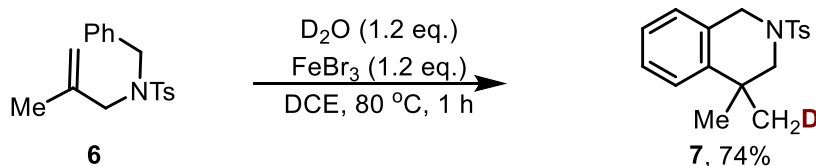

In a 4-mL screw-capped vial, FeBr<sub>3</sub> (70.9 mg, 0.24 mol), **6** (63.0 mg, 0.2 mmol), DCE (1.0 mL) and a magnetic stirring bar were added under air. Then D<sub>2</sub>O (4.8 mg, 0.24 mmol) were added. The vial was sealed with a cap containing a PTFE septum, then transferred to an oil bath at 80 °C. The reaction mixture was stirred at 80 °C for 1 h and the resulting solution was concentrated in vacuum. The crude product was purified by column chromatography on silica gel with a mixture of ethyl acetate and hexane (1:50) as eluent, and data for characterization of the product **7** is listed below.

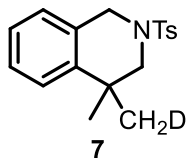**7**

The title compound was isolated (46.8 mg, 74%) as a white solid after flash chromatography on silica gel (Hexane/EtOAc = 50:1). <sup>1</sup>H NMR (600 MHz, CDCl<sub>3</sub>) δ 7.78 – 7.69 (m, 2H), 7.36 (d, *J* = 8.0 Hz, 2H), 7.30 (dd, *J* = 7.9, 1.3 Hz, 1H), 7.19 (td, *J* = 7.6, 1.4 Hz, 1H), 7.12 (td, *J* = 7.5, 1.3 Hz, 1H), 7.00 (dd, *J* = 7.7, 1.3 Hz, 1H), 4.21 (s, 2H), 3.02 (s, 2H), 2.43 (s, 3H), 1.34 (m, 5H). <sup>13</sup>C NMR (101 MHz, CDCl<sub>3</sub>) δ 143.8, 142.7, 133.1, 130.5, 129.8, 127.9, 127.2, 126.3, 126.2, 125.9, 56.1, 48.6, 35.5, 28.5, 28.5-28.1 (m), 21.6.

### Crystal structure of 2d and 2k

Single crystal of product **2d** and **2k** was obtained through slow evaporation of a mix solution in n-hexane and dichloromethane at room temperature. X-ray data was collected with a Bruker APEX-II CCD diffractometer.



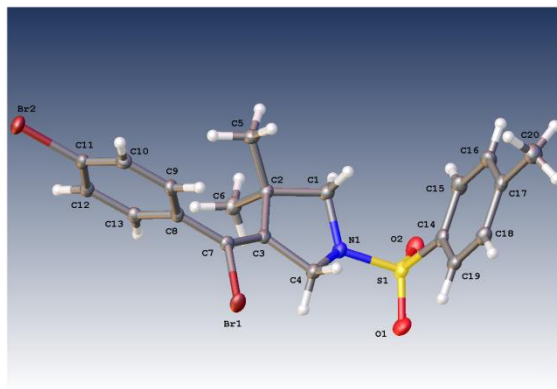**Table 1 Crystal data and structure refinement for 2d.**

|                                             |                                                                   |
|---------------------------------------------|-------------------------------------------------------------------|
| Identification code                         | 2d                                                                |
| Empirical formula                           | C <sub>20</sub> H <sub>21</sub> Br <sub>2</sub> NO <sub>2</sub> S |
| Formula weight                              | 499.26                                                            |
| Temperature/K                               | 100.00                                                            |
| Crystal system                              | monoclinic                                                        |
| Space group                                 | P2 <sub>1</sub> /c                                                |
| a/Å                                         | 24.3597(8)                                                        |
| b/Å                                         | 6.0092(2)                                                         |
| c/Å                                         | 13.7493(5)                                                        |
| α/°                                         | 90                                                                |
| β/°                                         | 97.850(2)                                                         |
| γ/°                                         | 90                                                                |
| Volume/Å <sup>3</sup>                       | 1993.79(12)                                                       |
| Z                                           | 4                                                                 |
| ρ <sub>calc</sub> /g/cm <sup>3</sup>        | 1.663                                                             |
| μ/mm <sup>-1</sup>                          | 6.252                                                             |
| F(000)                                      | 1000.0                                                            |
| Crystal size/mm <sup>3</sup>                | 0.1 × 0.1 × 0.1                                                   |
| Radiation                                   | CuKα (λ = 1.54178)                                                |
| 2θ range for data collection/°              | 7.326 to 144.166                                                  |
| Index ranges                                | -30 ≤ h ≤ 30, -7 ≤ k ≤ 7, -16 ≤ l ≤ 16                            |
| Reflections collected                       | 50364                                                             |
| Independent reflections                     | 3920 [R <sub>int</sub> = 0.0546, R <sub>sigma</sub> = 0.0293]     |
| Data/restraints/parameters                  | 3920/0/238                                                        |
| Goodness-of-fit on F <sup>2</sup>           | 1.221                                                             |
| Final R indexes [I >= 2σ (I)]               | R <sub>1</sub> = 0.0293, wR <sub>2</sub> = 0.0734                 |
| Final R indexes [all data]                  | R <sub>1</sub> = 0.0294, wR <sub>2</sub> = 0.0734                 |
| Largest diff. peak/hole / e Å <sup>-3</sup> | 1.04/-0.71                                                        |

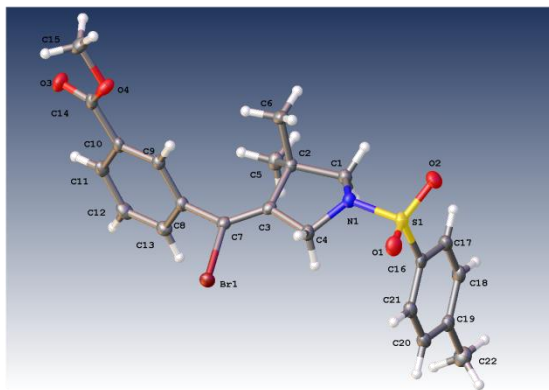**Table 1 Crystal data and structure refinement for 2k.**

|                                             |                                                               |
|---------------------------------------------|---------------------------------------------------------------|
| Identification code                         | 2k                                                            |
| Empirical formula                           | C <sub>22</sub> H <sub>24</sub> BrNO <sub>4</sub> S           |
| Formula weight                              | 478.39                                                        |
| Temperature/K                               | 101.00                                                        |
| Crystal system                              | monoclinic                                                    |
| Space group                                 | P2 <sub>1</sub> /c                                            |
| a/Å                                         | 26.5945(8)                                                    |
| b/Å                                         | 6.1407(2)                                                     |
| c/Å                                         | 13.3679(4)                                                    |
| α/°                                         | 90                                                            |
| β/°                                         | 103.4980(10)                                                  |
| γ/°                                         | 90                                                            |
| Volume/Å <sup>3</sup>                       | 2122.79(11)                                                   |
| Z                                           | 4                                                             |
| ρ <sub>calc</sub> /g/cm <sup>3</sup>        | 1.497                                                         |
| μ/mm <sup>-1</sup>                          | 3.797                                                         |
| F(000)                                      | 984.0                                                         |
| Crystal size/mm <sup>3</sup>                | 0.1 × 0.1 × 0.1                                               |
| Radiation                                   | CuKα (λ = 1.54178)                                            |
| 2θ range for data collection/°              | 10.262 to 144.314                                             |
| Index ranges                                | -32 ≤ h ≤ 32, -7 ≤ k ≤ 7, -16 ≤ l ≤ 14                        |
| Reflections collected                       | 36287                                                         |
| Independent reflections                     | 4094 [R <sub>int</sub> = 0.0524, R <sub>sigma</sub> = 0.0326] |
| Data/restraints/parameters                  | 4094/0/266                                                    |
| Goodness-of-fit on F <sup>2</sup>           | 1.108                                                         |
| Final R indexes [I >= 2σ (I)]               | R <sub>1</sub> = 0.0370, wR <sub>2</sub> = 0.0929             |
| Final R indexes [all data]                  | R <sub>1</sub> = 0.0373, wR <sub>2</sub> = 0.0930             |
| Largest diff. peak/hole / e Å <sup>-3</sup> | 1.59/-0.66                                                    |

## References

- (1) a) M. Gerdin, S. K. Nadakudity, C. Worch, C. Moberg, *Adv. Synth. Catal.* **2010**, *352*, 2559; b) T. Xi, X. Chen, H. Zhang, Z. Lu, *Synthesis*, **2016**, *48*, 2837; c) J. H. Park, Y. Cho, Y. K. Chung, *Angew. Chem. Int. Ed.* **2010**, *49*, 5138; d) Y.-T. He, Q. Wang, J. Zhao, X.-Z. Wang, Y.-F. Qiu, Y.-C. Yang, J.-Y. Hu, X.-Y. Liu, Y. -M. Liang, *Adv. Synth. Catal.* **2015**, *357*, 3069; e) A. Gansäuer, M. Otte, L. Shi, *J. Am. Chem. Soc.* **2011**, *133*, 416; f) J. Huang, X. Hu, F. Chen, J. Gui, W. Zeng, *Org. Biomol. Chem.*, **2019**, *17*, 7042; g) K. R. Strom, A. C. Impastato, K. J. Moy, A. J. Landreth, J. K. Snyder, *Org. Lett.* **2015**, *17*, 2126; h) Y. Zhang, Y. -J. Wang, Q. Zou, X. -Y. Liu, Z. Chen, *Org. Lett.* **2022**, *24*, 8153.
- (2) R. Ebule, S. Liang, G. B. Hammond, B. Xu, *ACS Catal.* **2017**, *7*, 6798
- (3) K. Takahashi, K. Fukushima, M. Seto, A. Togashi, Y. Arai, M. Tsubuki, T. Honda, *J. Org. Chem.* **2018**, *83*, 10636.

## NMR spectra

 $^1\text{H}$  NMR of **2a** (600 MHz,  $\text{CDCl}_3$ )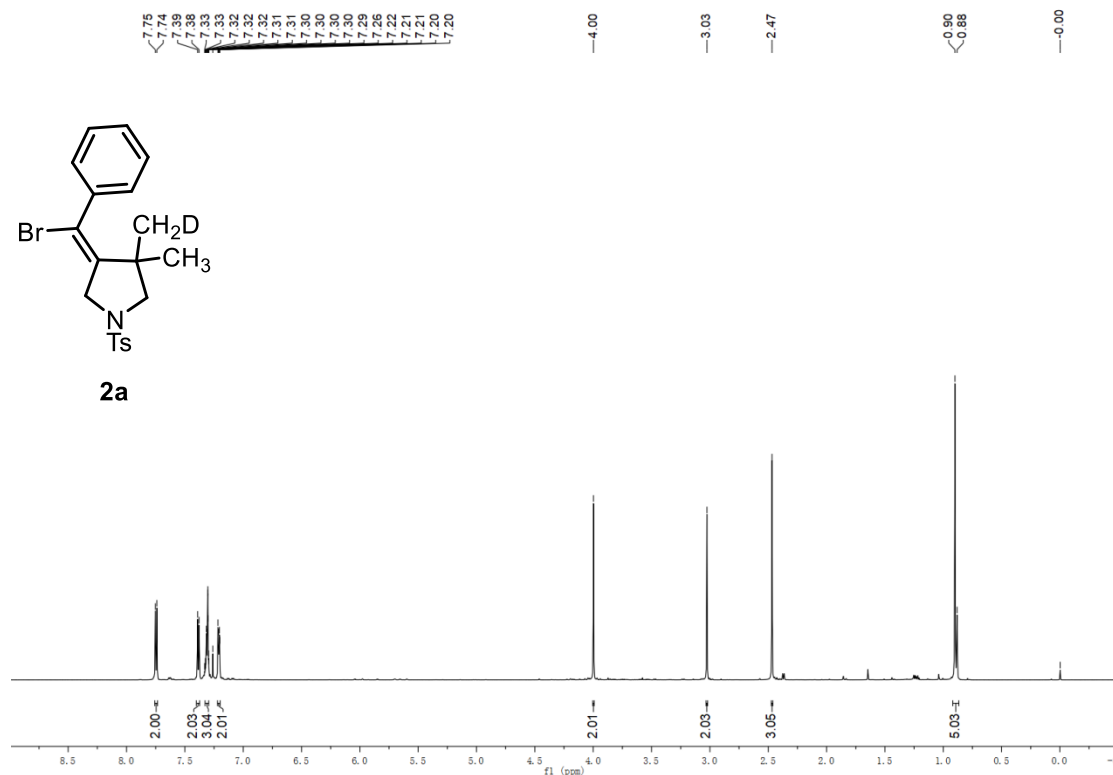 $^{13}\text{C}$  NMR of **2a** (151 MHz,  $\text{CDCl}_3$ )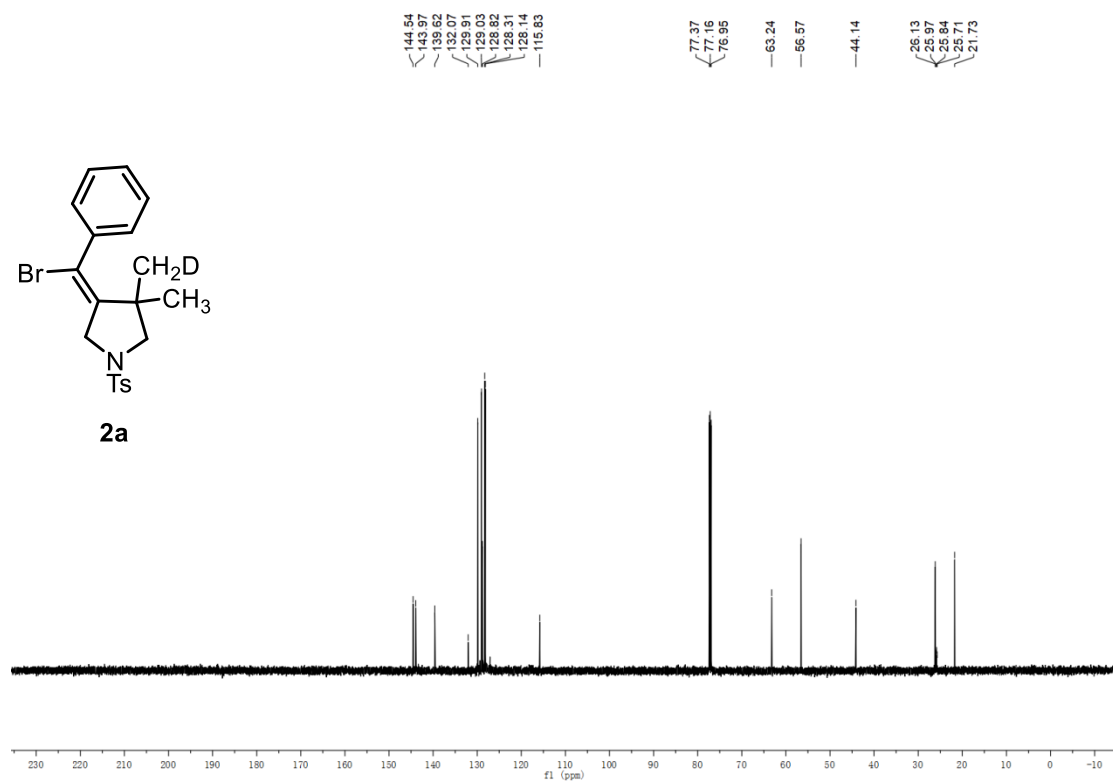

$^1\text{H}$  NMR of **2b** (600 MHz,  $\text{CDCl}_3$ )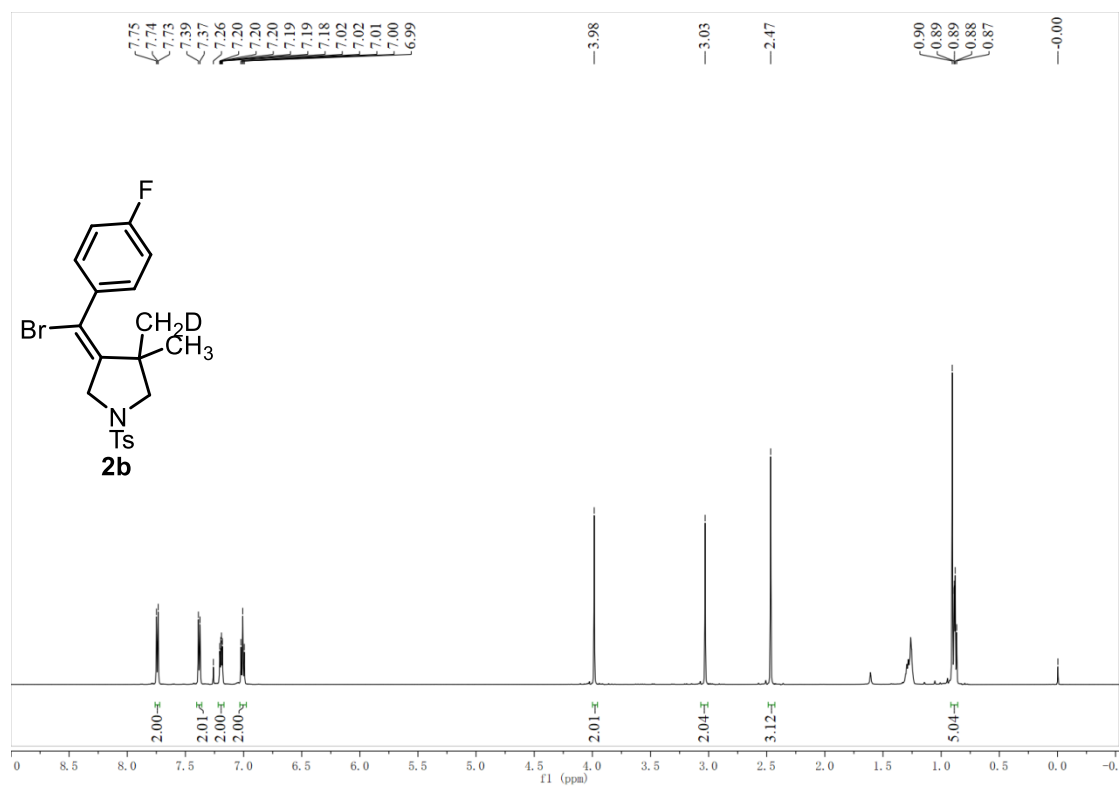 $^{13}\text{C}$  NMR of **2b** (151 MHz,  $\text{CDCl}_3$ )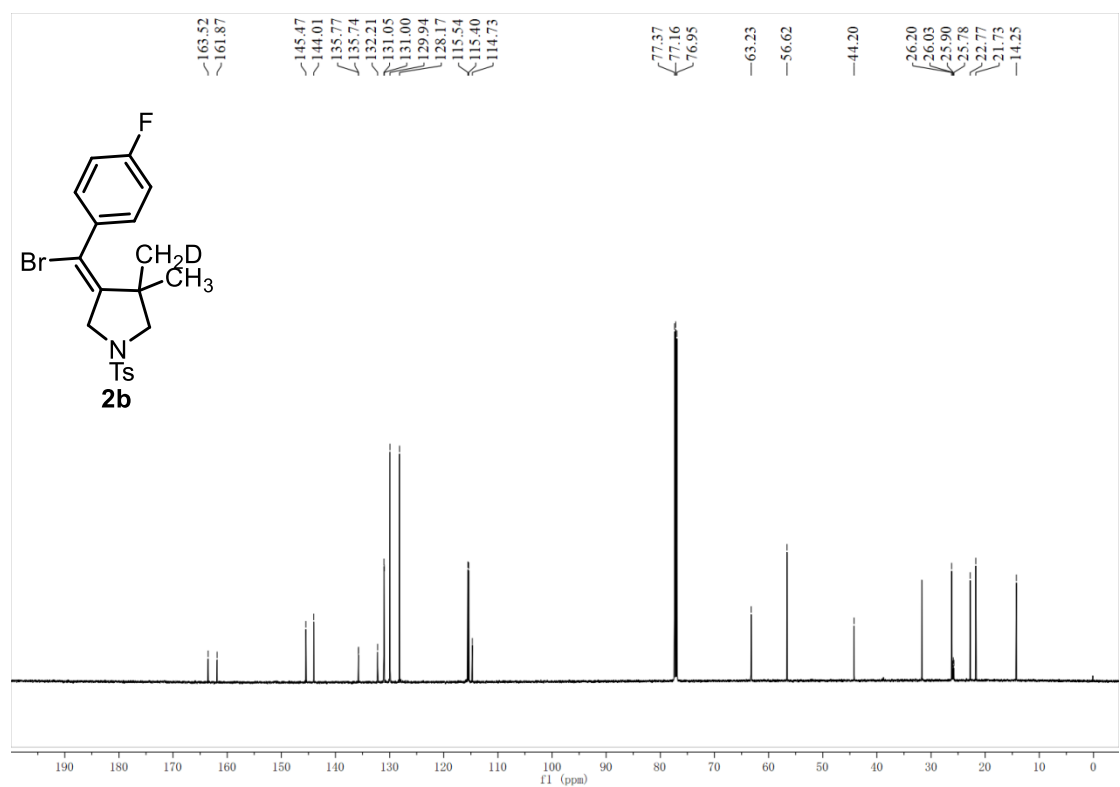

$^{19}\text{F}$  NMR of **2b** (565 MHz,  $\text{CDCl}_3$ )

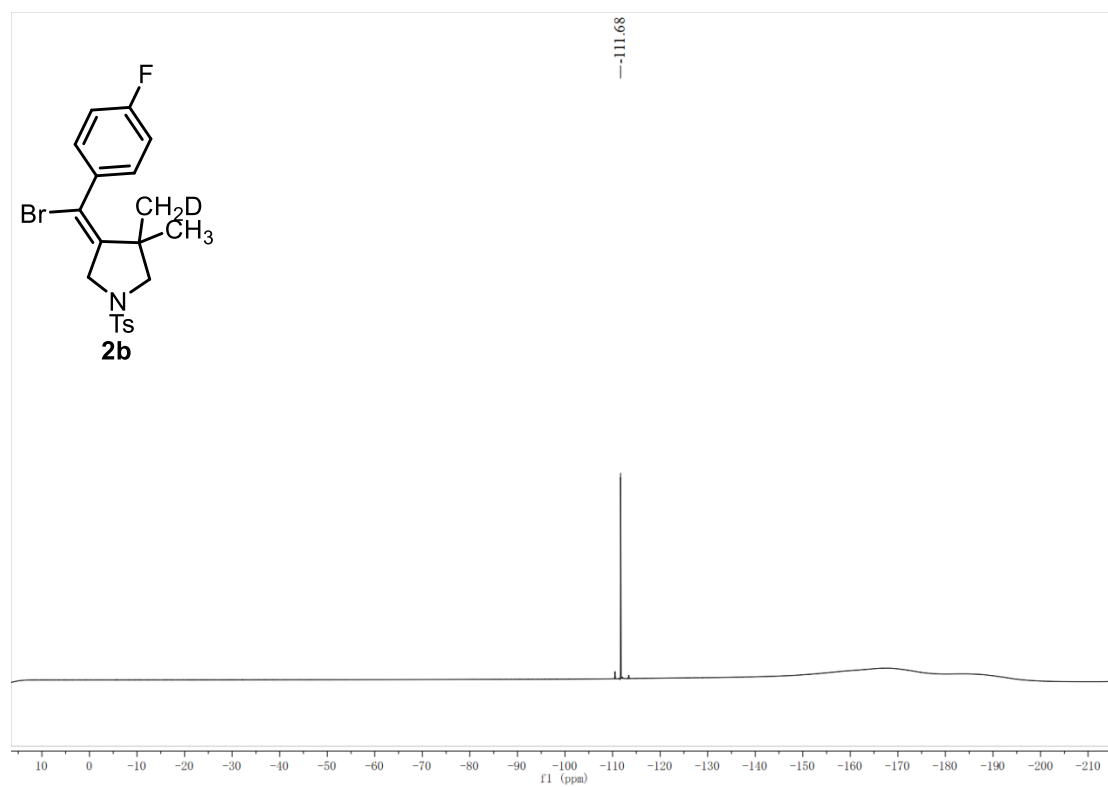

$^1\text{H}$  NMR of **2c** (400 MHz,  $\text{CDCl}_3$ )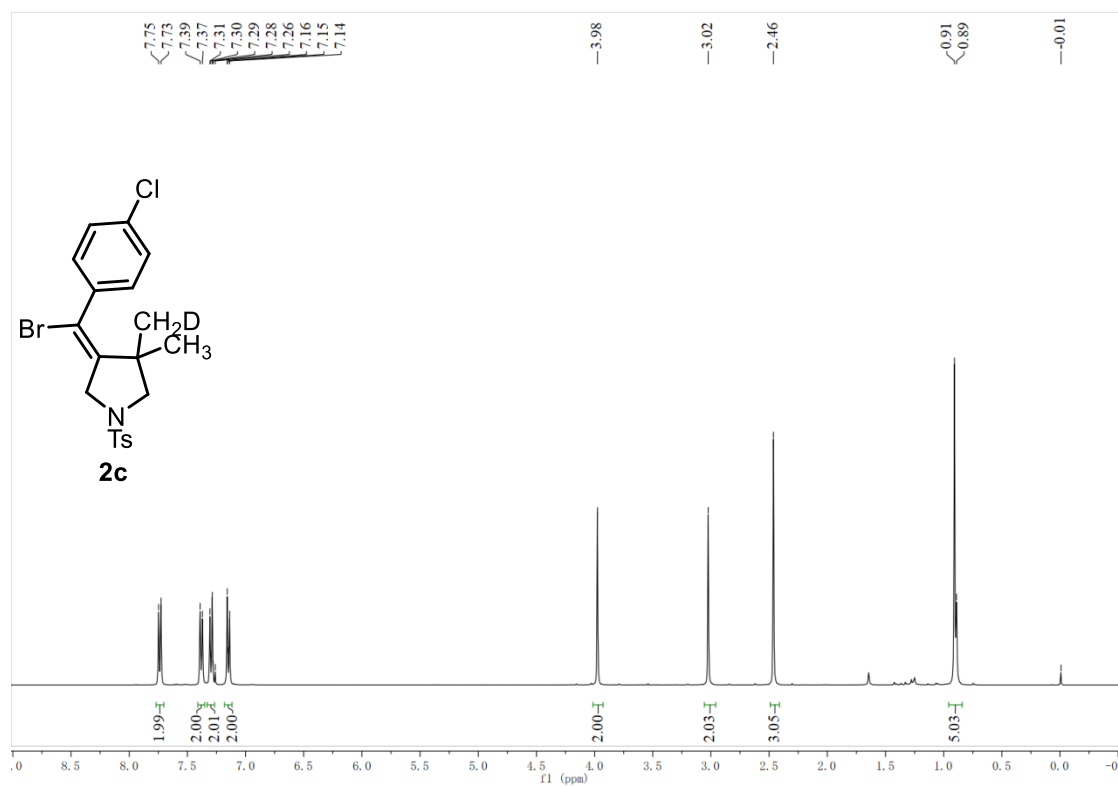 $^{13}\text{C}$  NMR of **2c** (101 MHz,  $\text{CDCl}_3$ )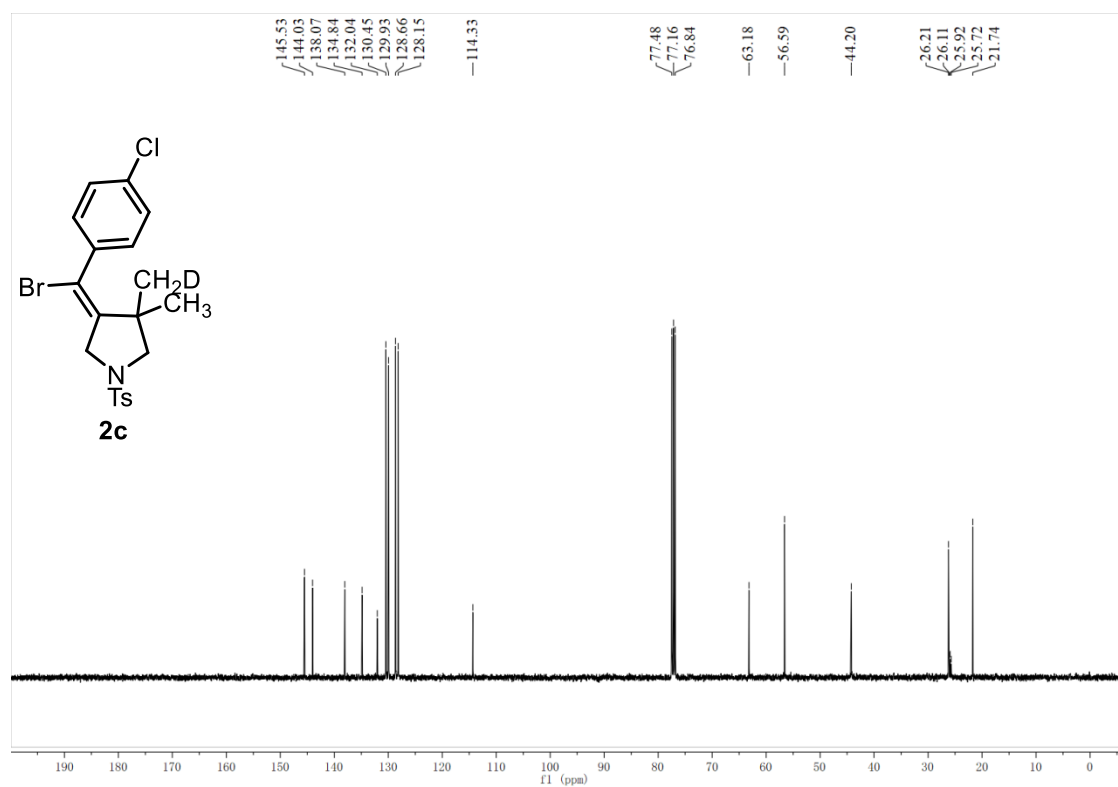





$^1\text{H}$  NMR of **2e** (400 MHz,  $\text{CDCl}_3$ )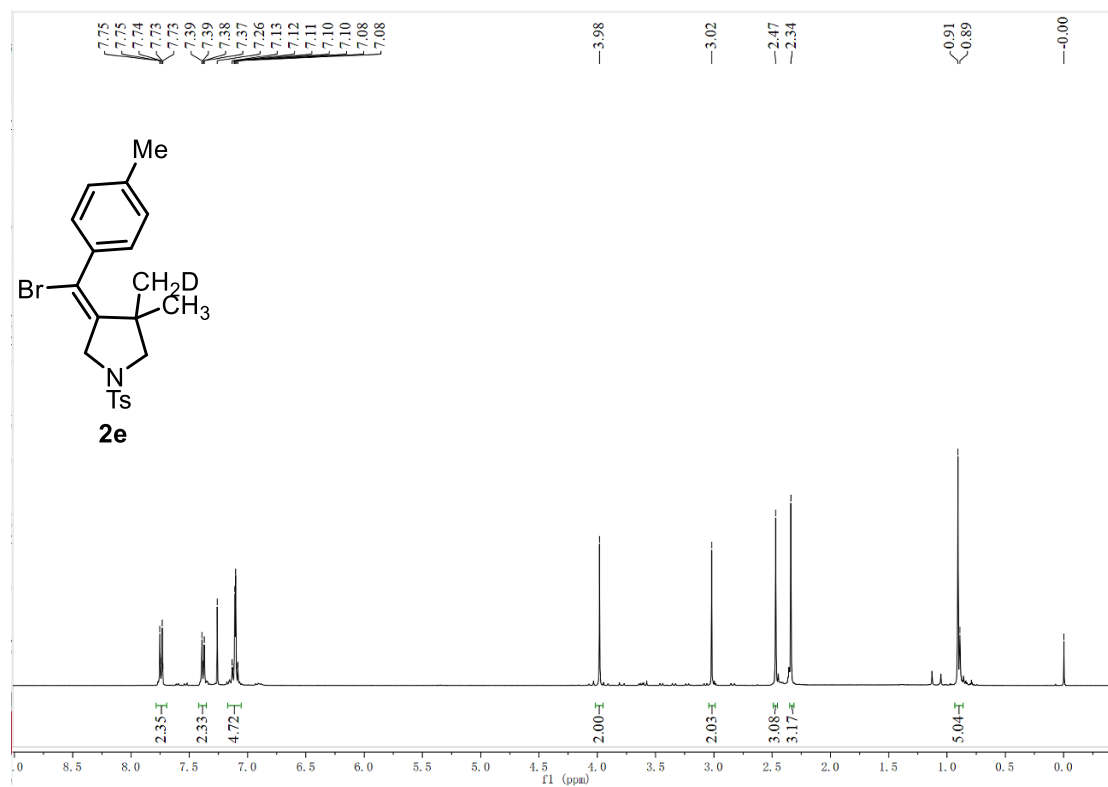 $^{13}\text{C}$  NMR of **2e** (101 MHz,  $\text{CDCl}_3$ )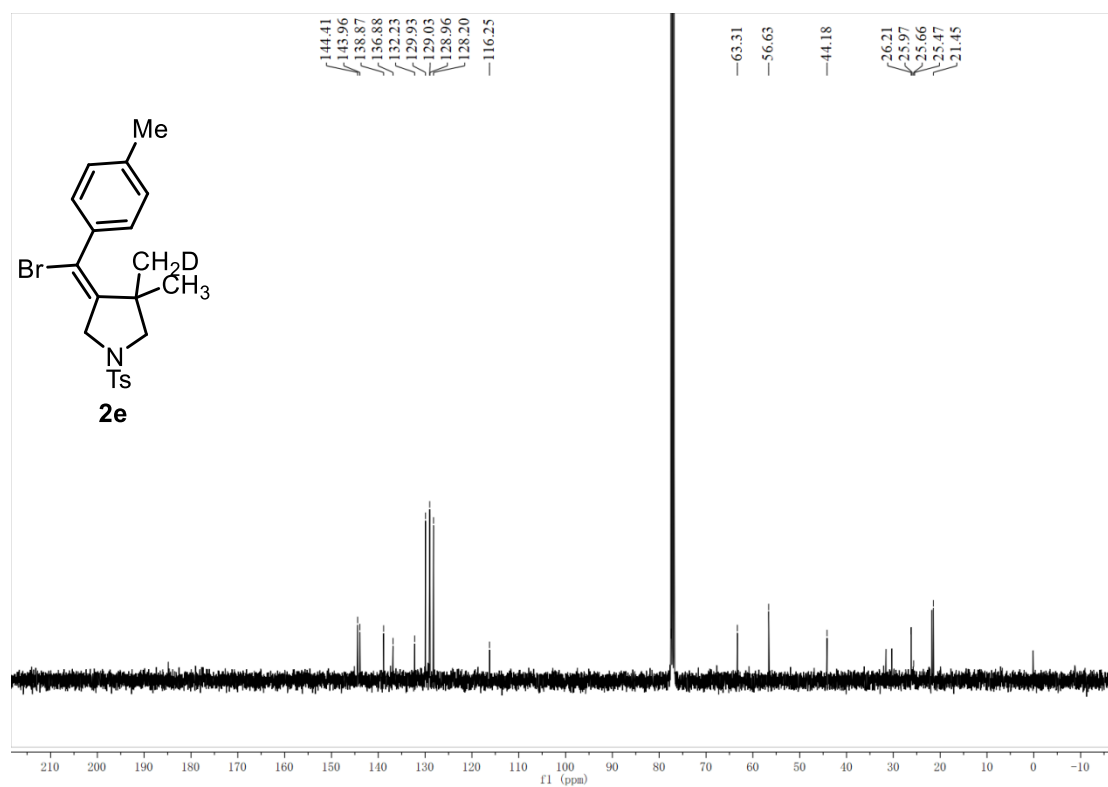

$^1\text{H}$  NMR of **2f** (600 MHz,  $\text{CDCl}_3$ )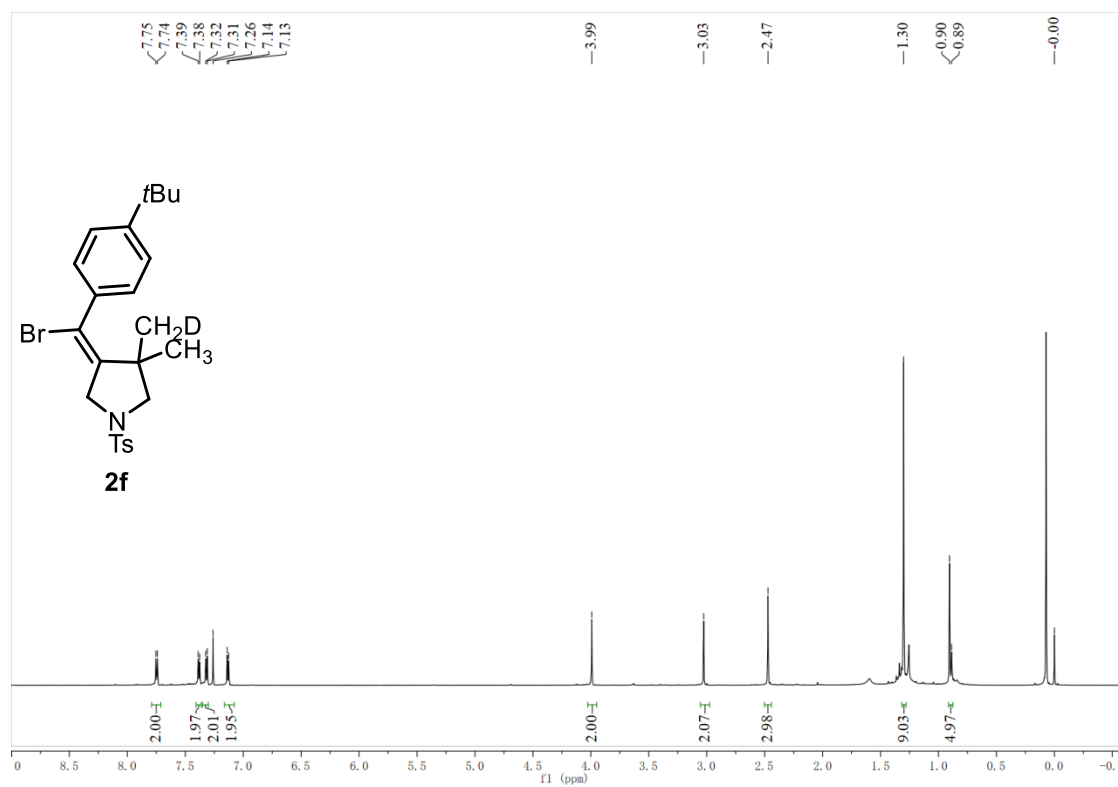 $^{13}\text{C}$  NMR of **2f** (151 MHz,  $\text{CDCl}_3$ )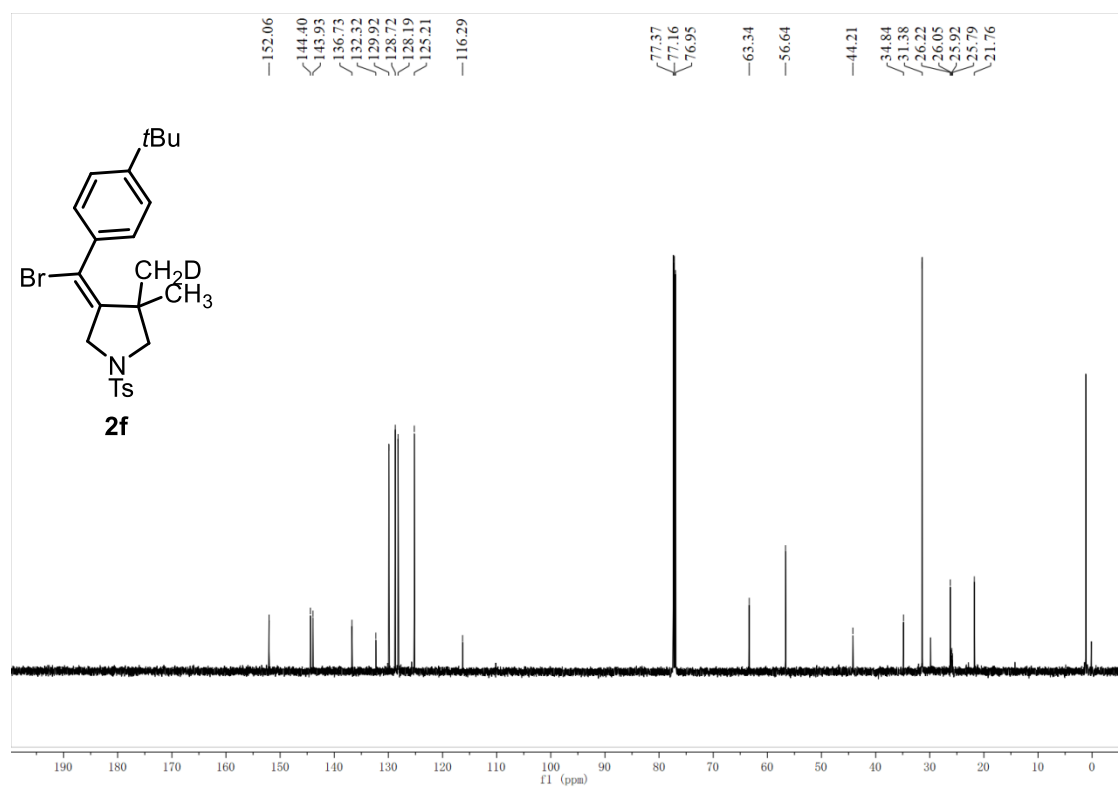

$^1\text{H}$  NMR of **2g** (400 MHz,  $\text{CDCl}_3$ )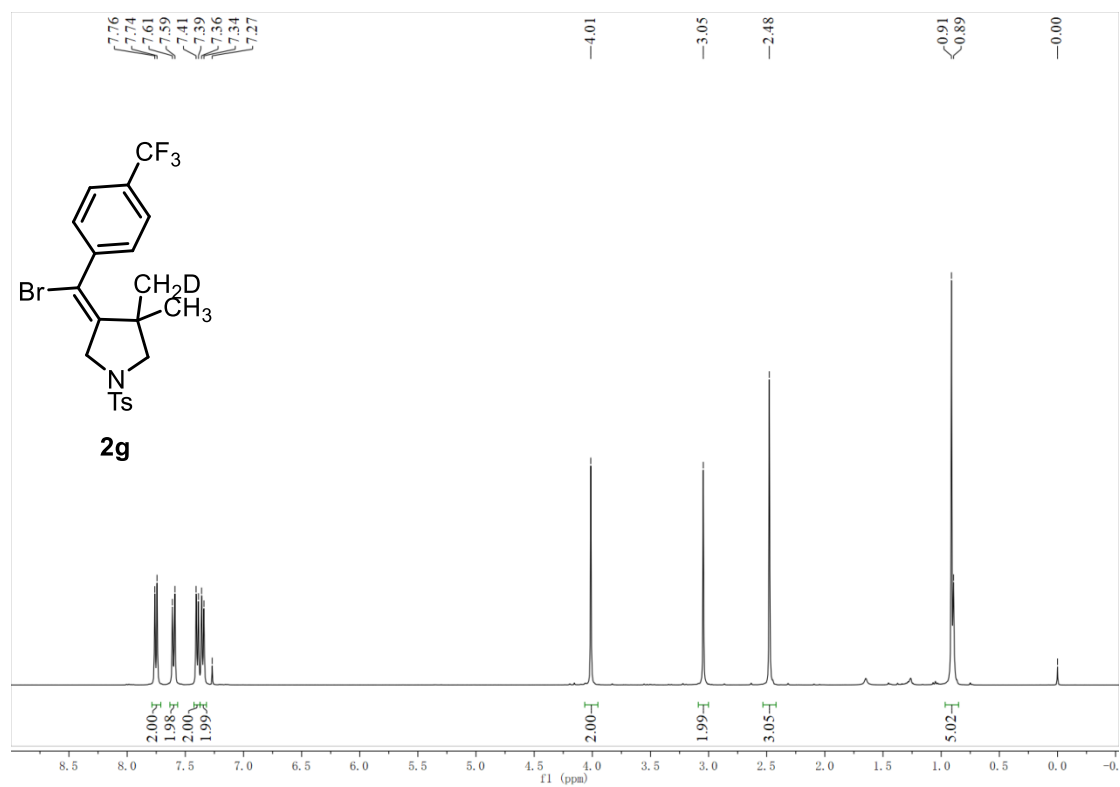 $^{13}\text{C}$  NMR of **2g** (101 MHz,  $\text{CDCl}_3$ )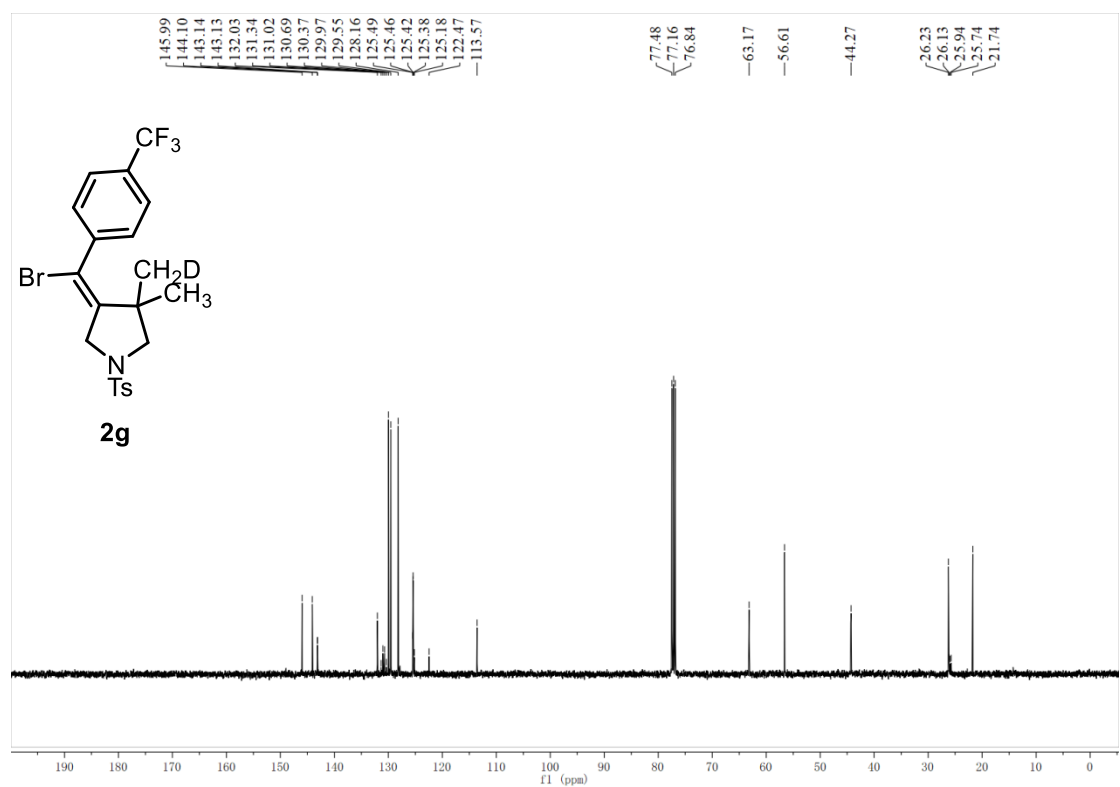

$^{19}\text{F}$  NMR of **2g** (376 MHz,  $\text{CDCl}_3$ )

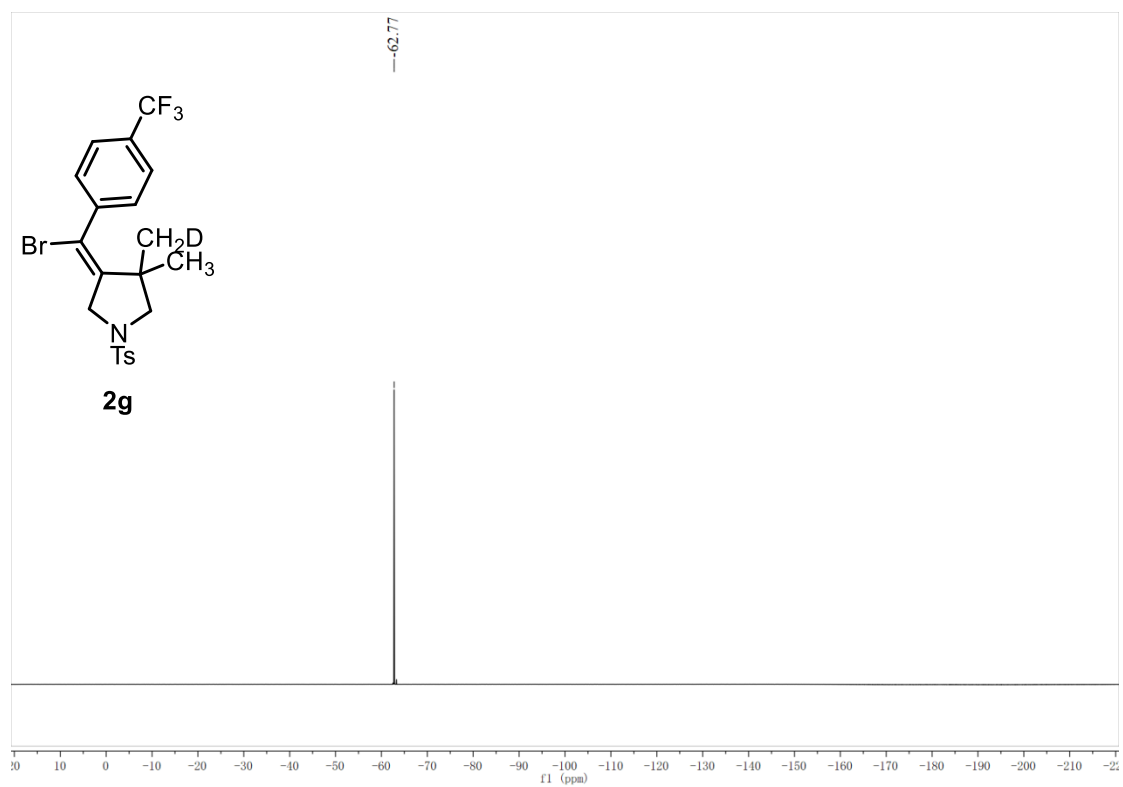

$^1\text{H}$  NMR of **2h** (600 MHz,  $\text{CDCl}_3$ )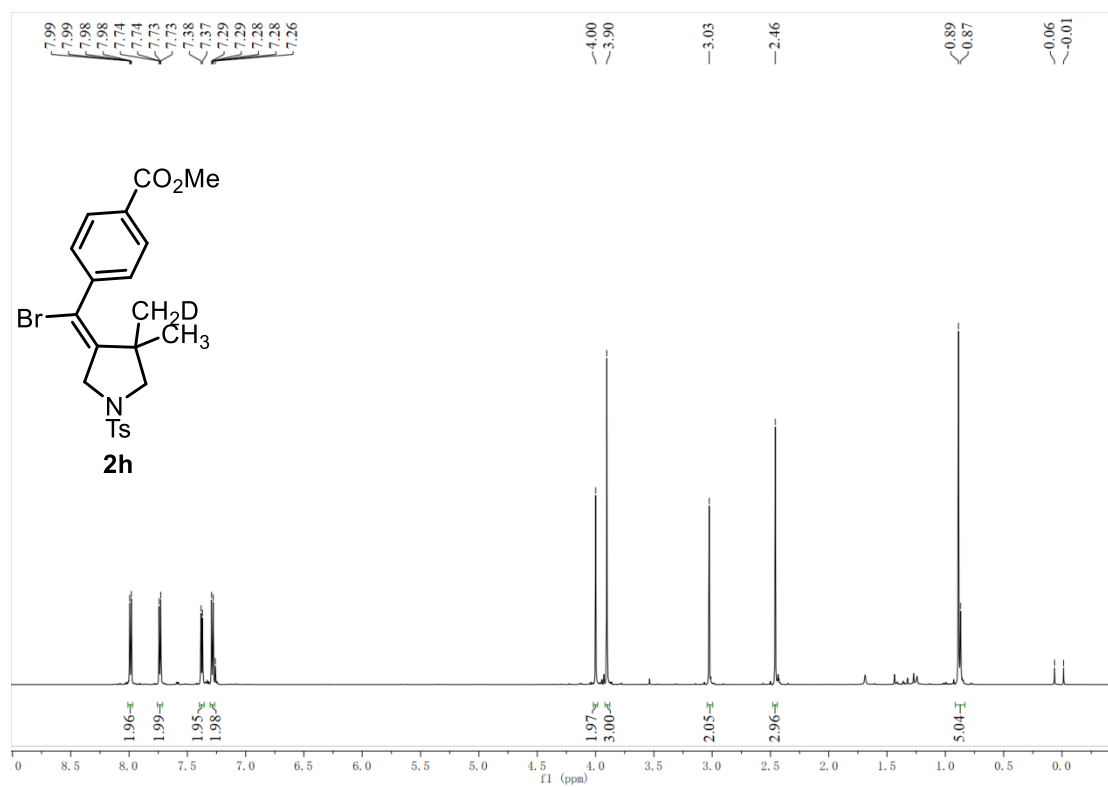 $^{13}\text{C}$  NMR of **2h** (151 MHz,  $\text{CDCl}_3$ )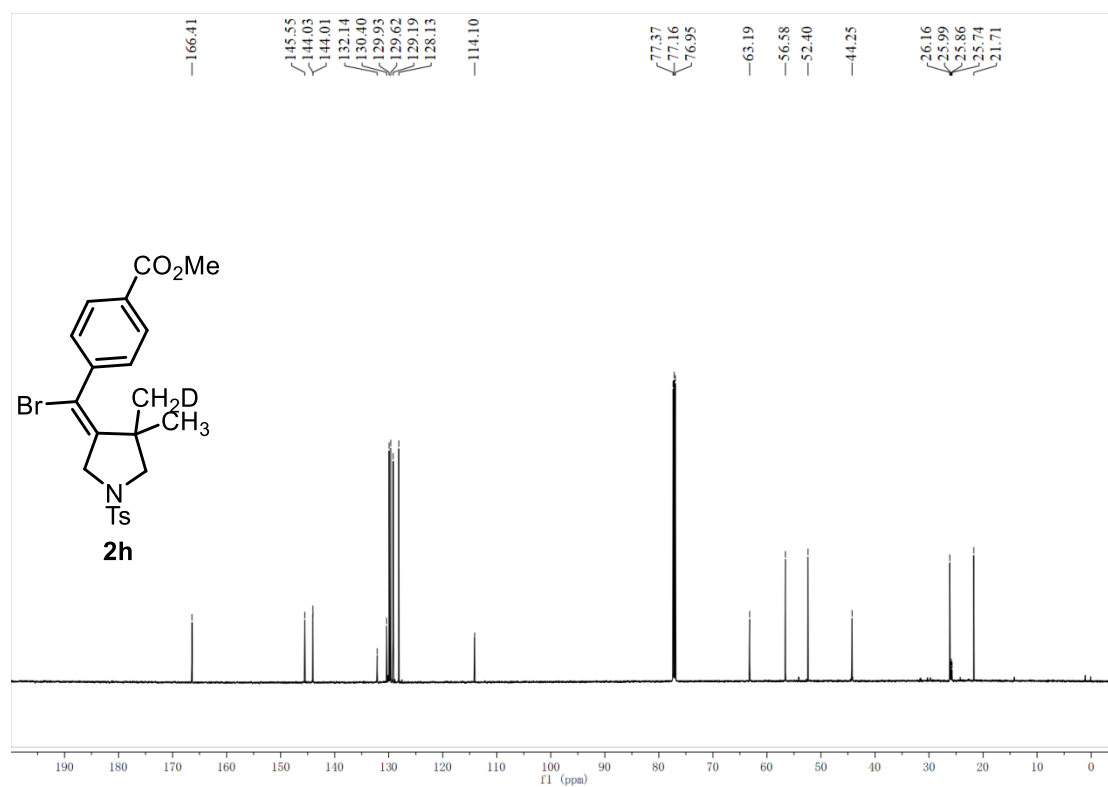

$^1\text{H}$  NMR of **2i** (400 MHz,  $\text{CDCl}_3$ )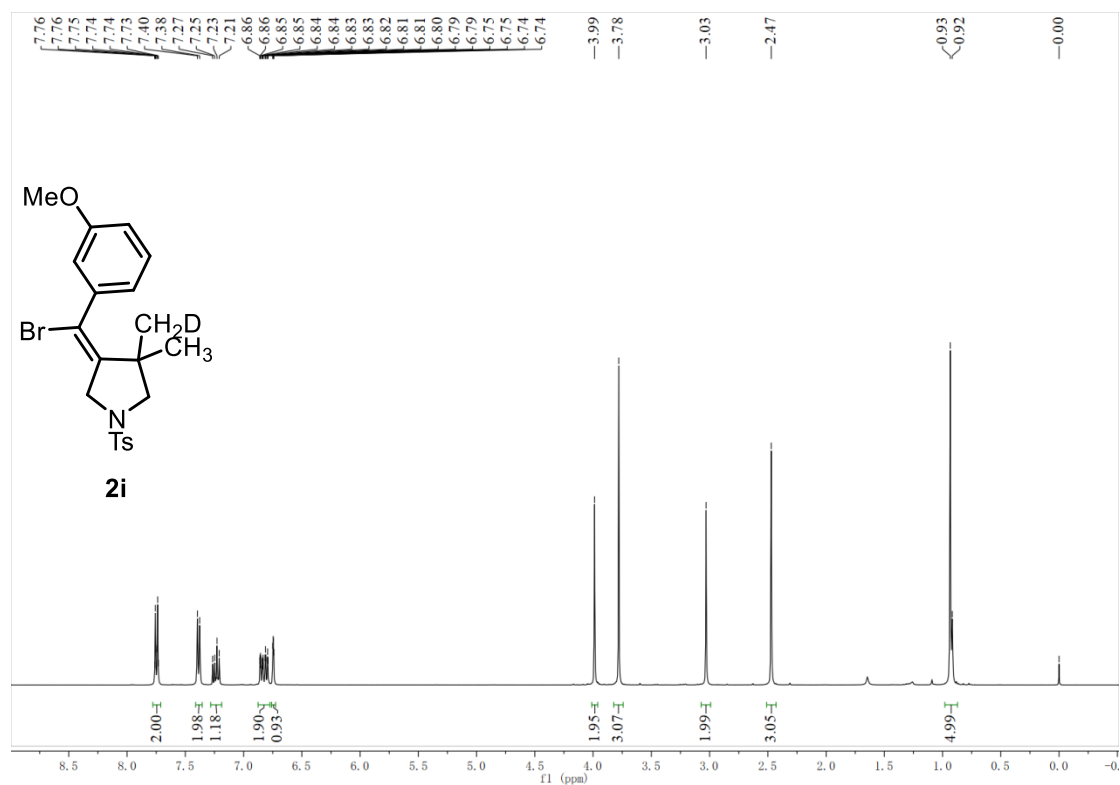 $^{13}\text{C}$  NMR of **2i** (101 MHz,  $\text{CDCl}_3$ )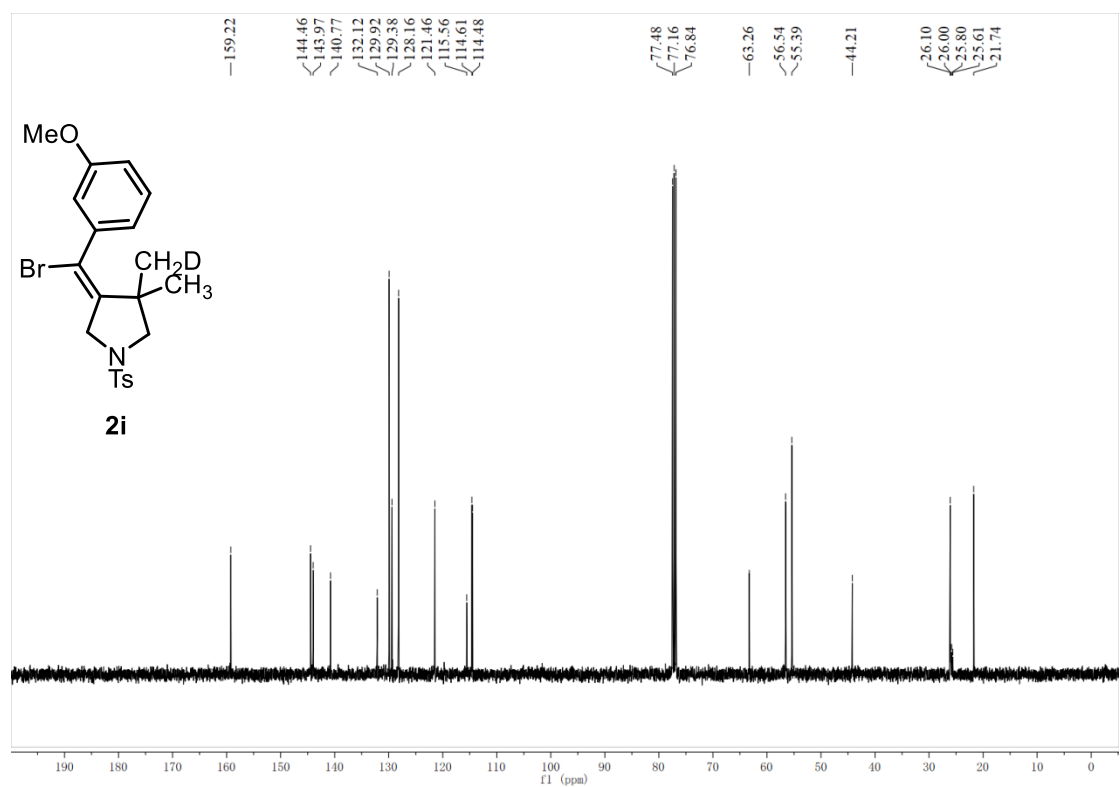

$^1\text{H}$  NMR of **2j** (400 MHz,  $\text{CDCl}_3$ )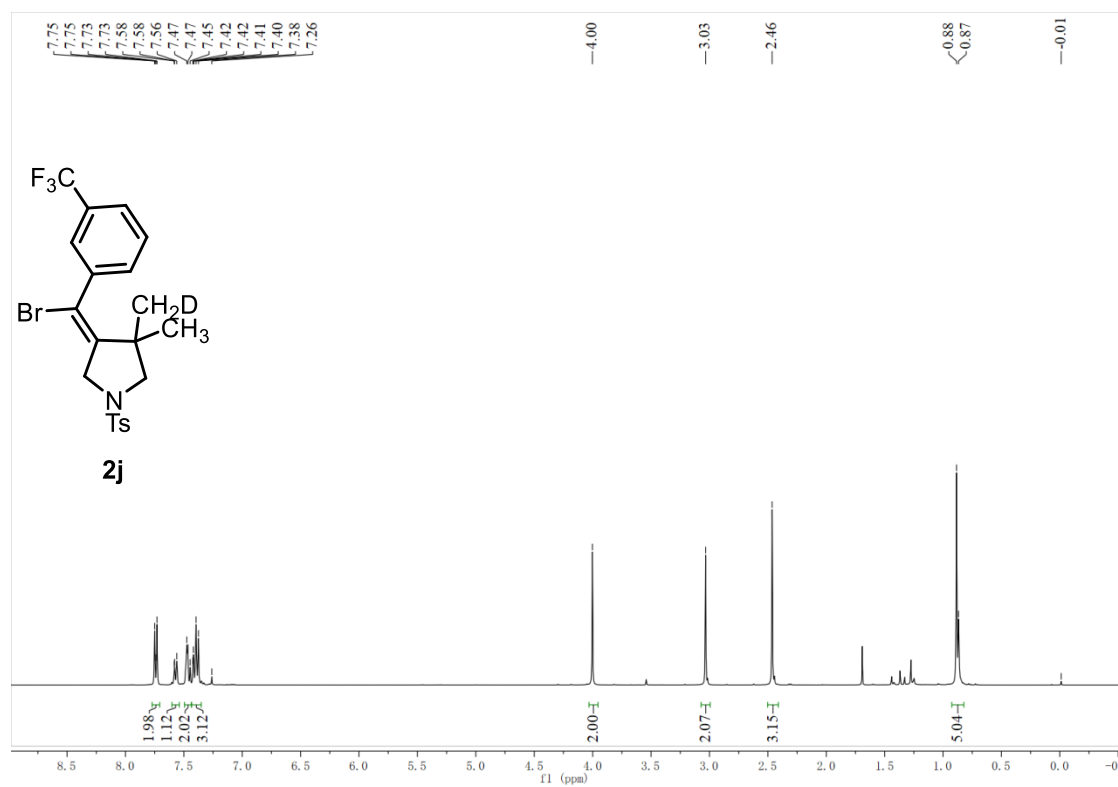 $^{13}\text{C}$  NMR of **2j** (101 MHz,  $\text{CDCl}_3$ )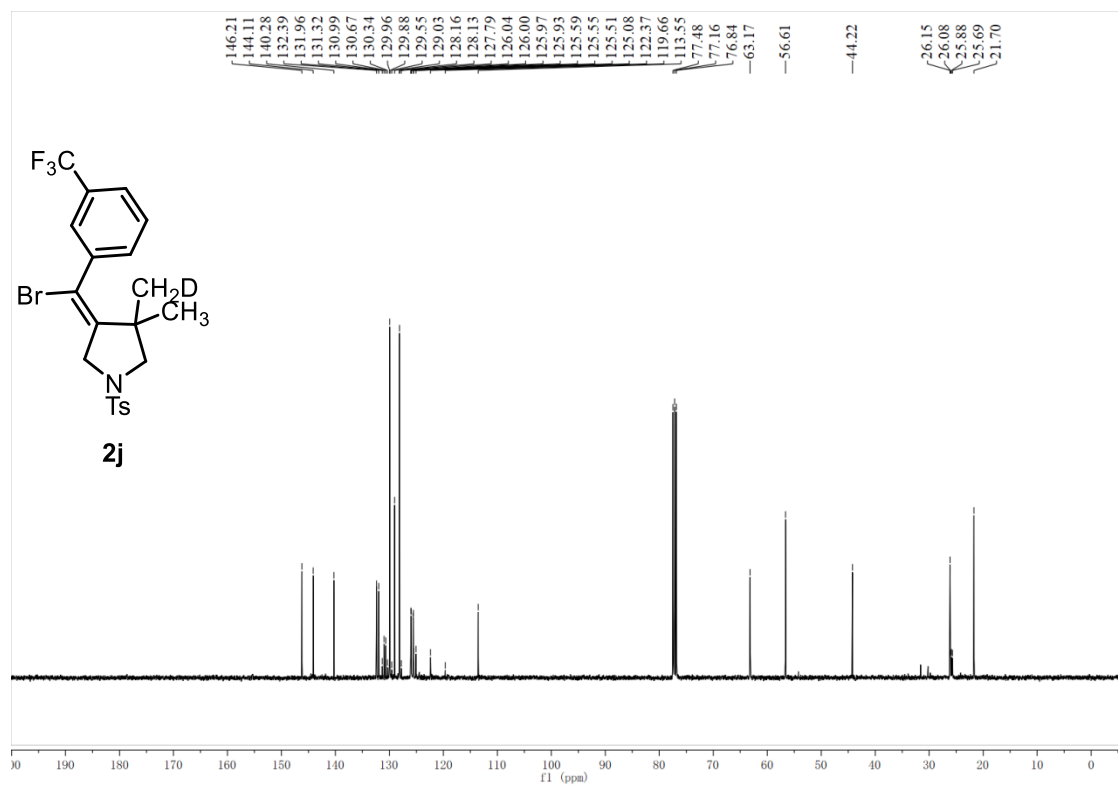

$^{19}\text{F}$  NMR of **2j** (565 MHz,  $\text{CDCl}_3$ )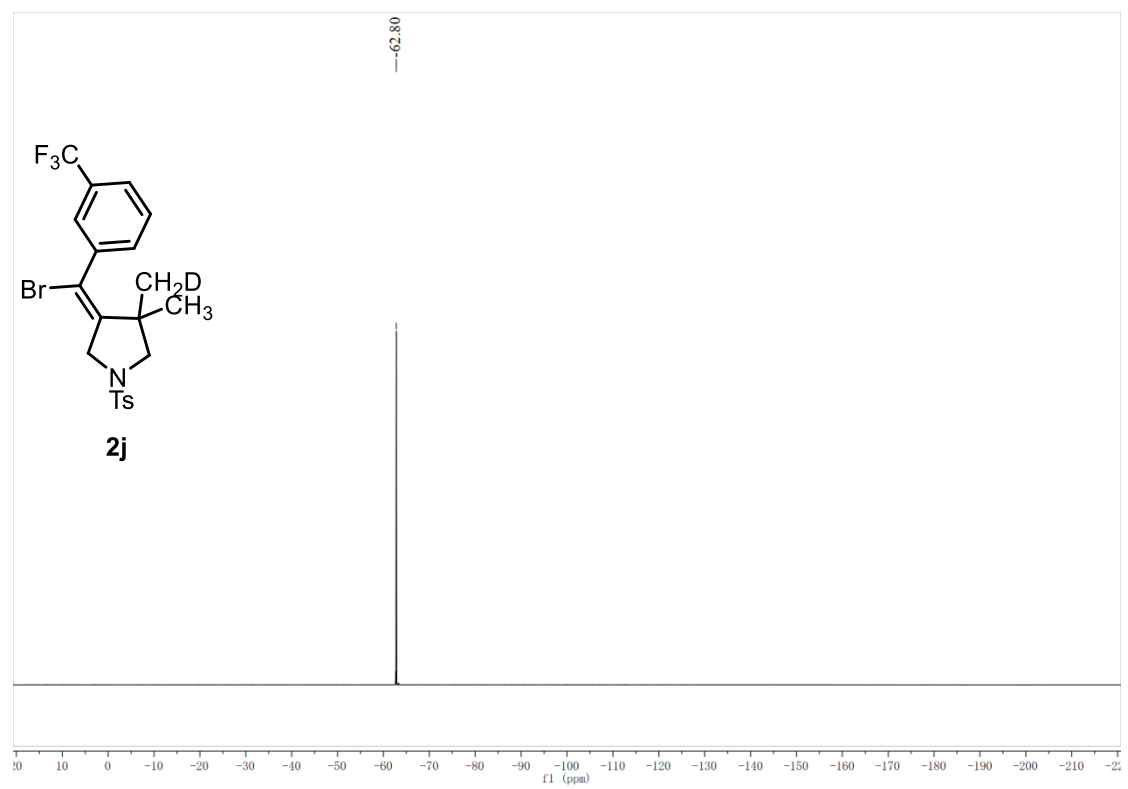



$^1\text{H}$  NMR of **2k** (400 MHz,  $\text{CDCl}_3$ )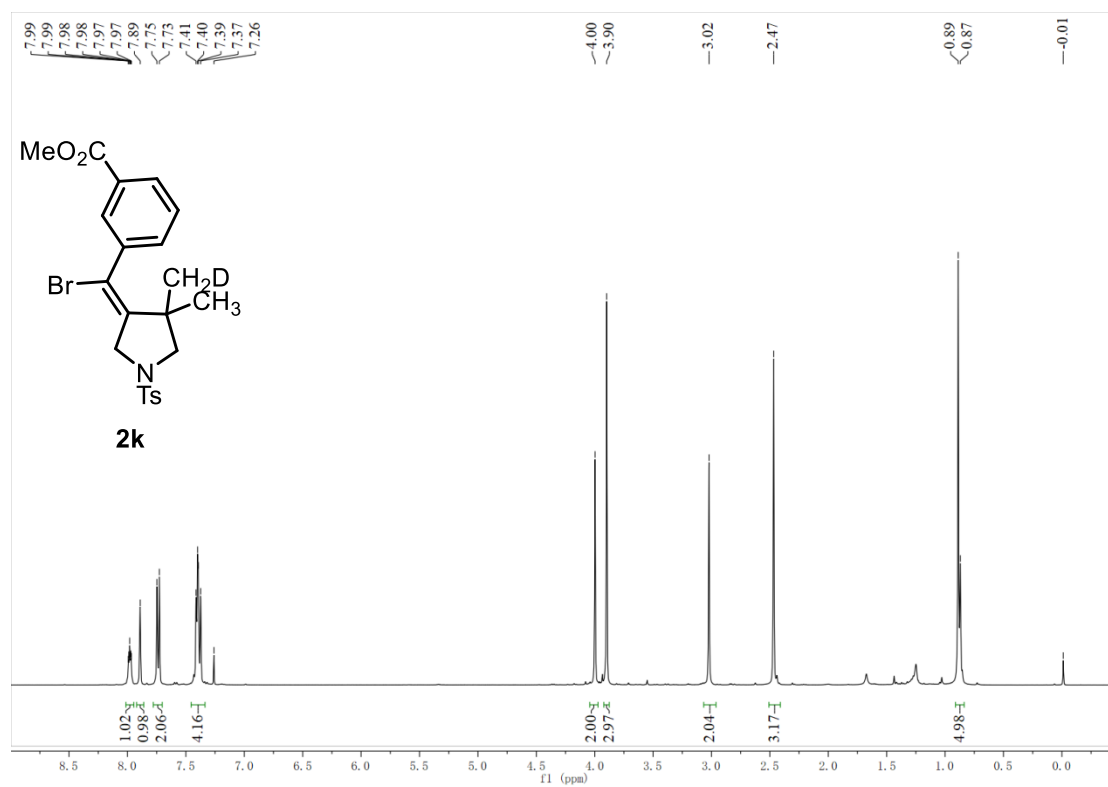 $^{13}\text{C}$  NMR of **2k** (101 MHz,  $\text{CDCl}_3$ )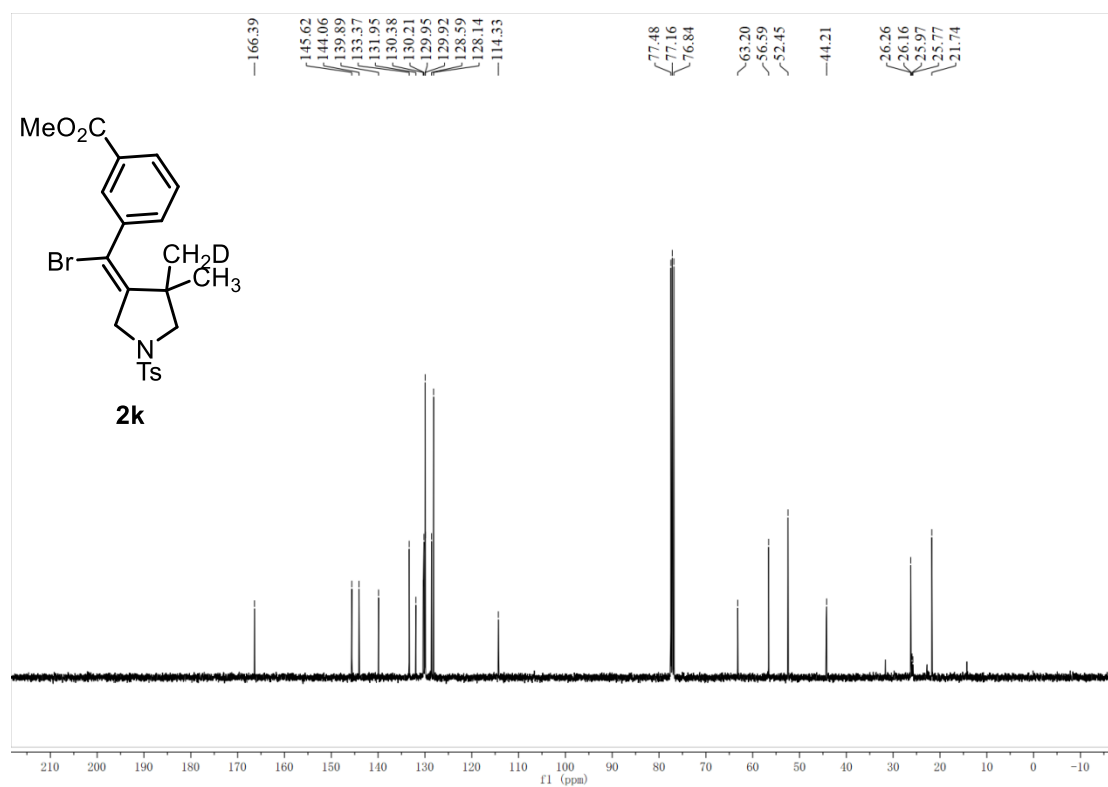

$^1\text{H}$  NMR of **2I** (400 MHz,  $\text{CDCl}_3$ )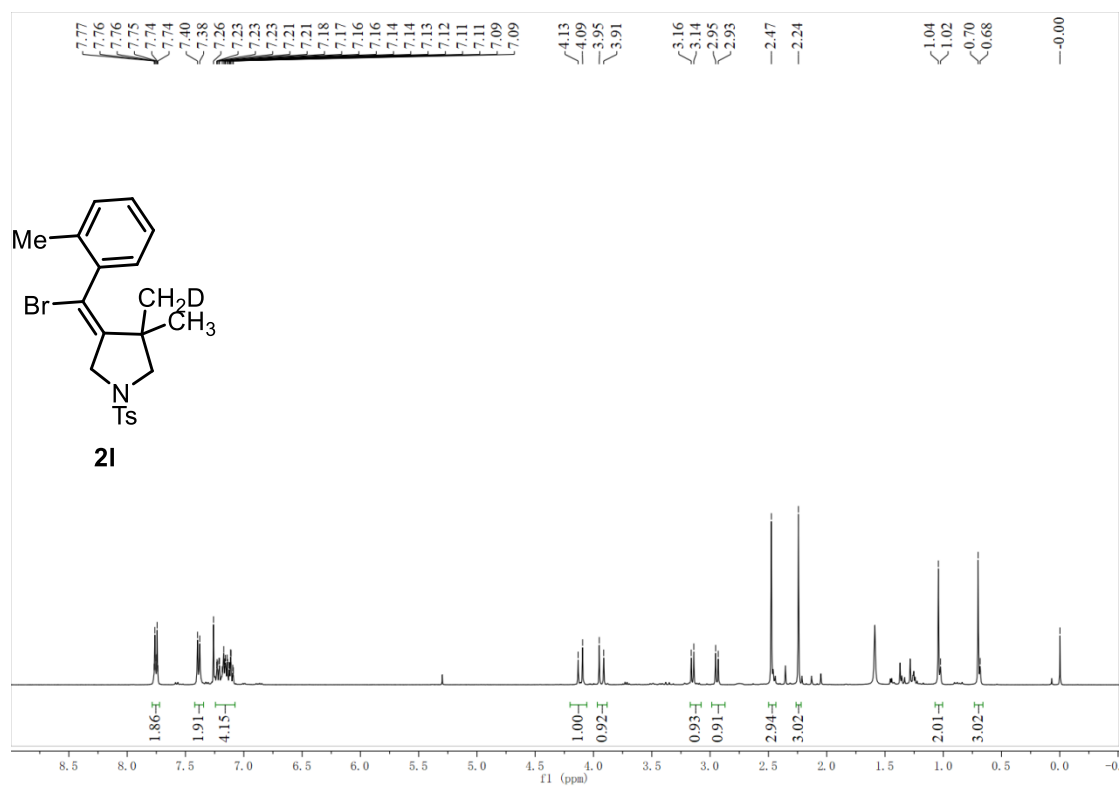 $^{13}\text{C}$  NMR of **2I** (151 MHz,  $\text{CDCl}_3$ )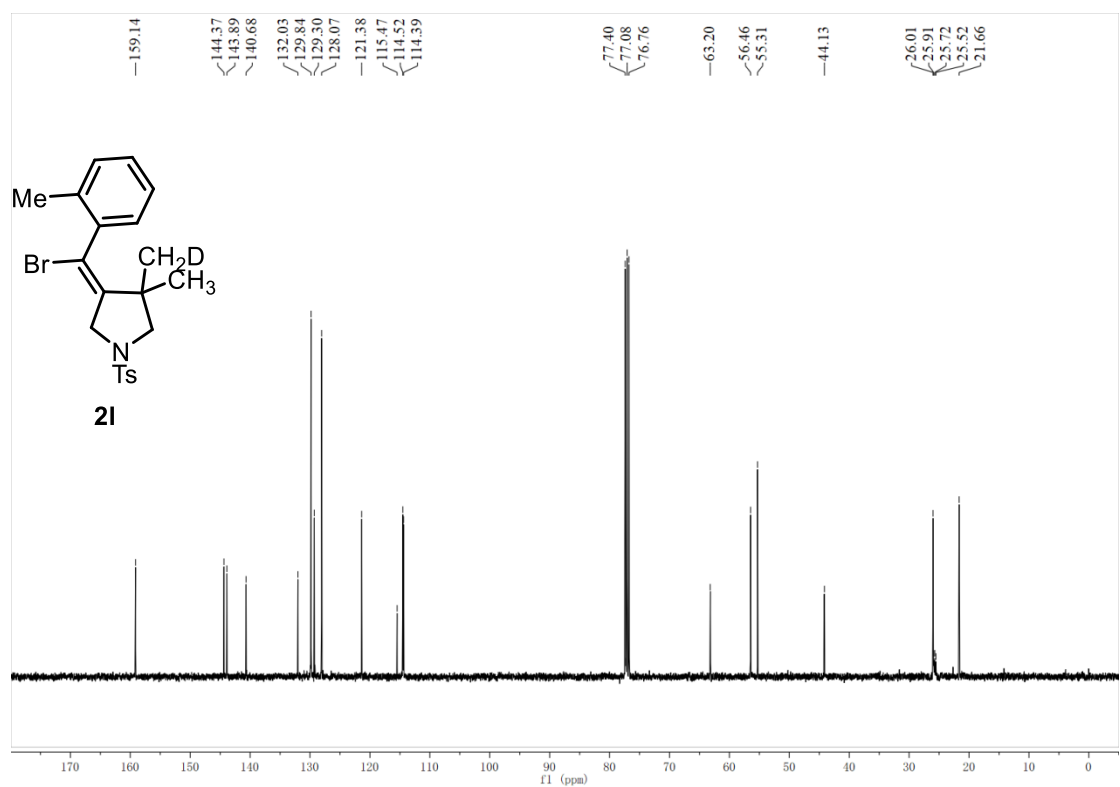

$^1\text{H}$  NMR of **2m** (400 MHz,  $\text{CDCl}_3$ )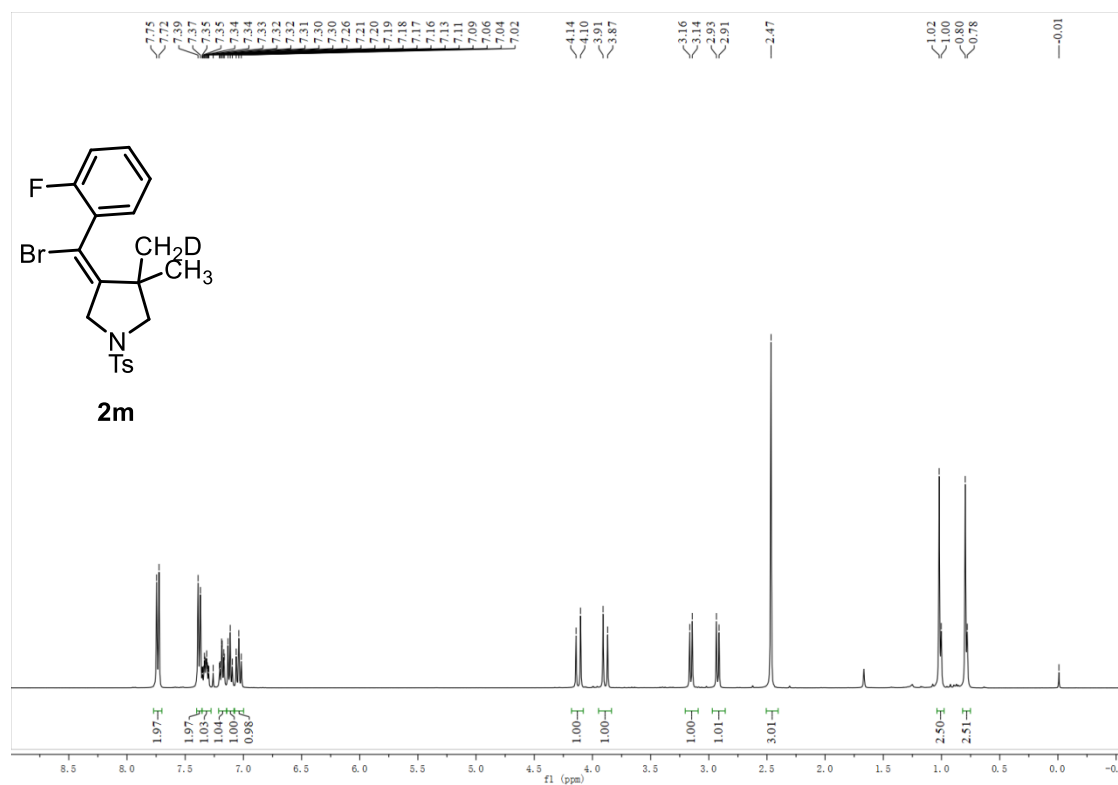 $^{13}\text{C}$  NMR of **2m** (101 MHz,  $\text{CDCl}_3$ )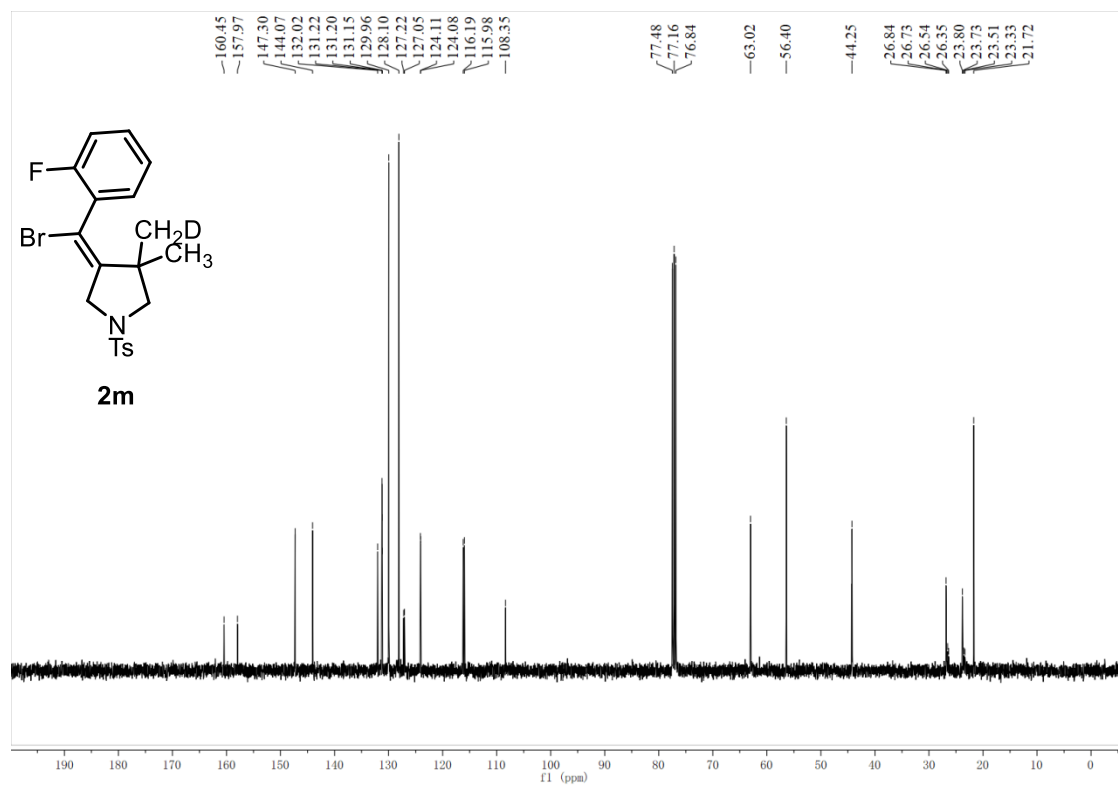

$^{19}\text{F}$  NMR of **2m** (376 MHz,  $\text{CDCl}_3$ )

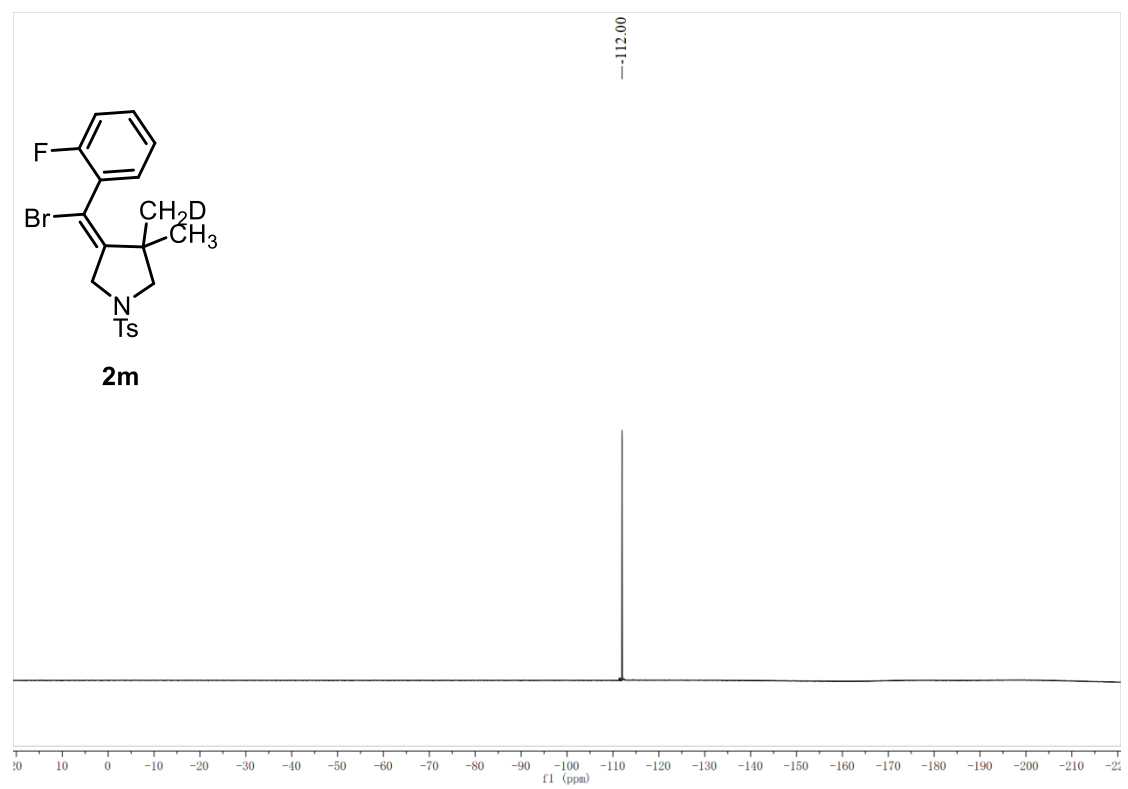

$^1\text{H}$  NMR of **2n** (400 MHz,  $\text{CDCl}_3$ )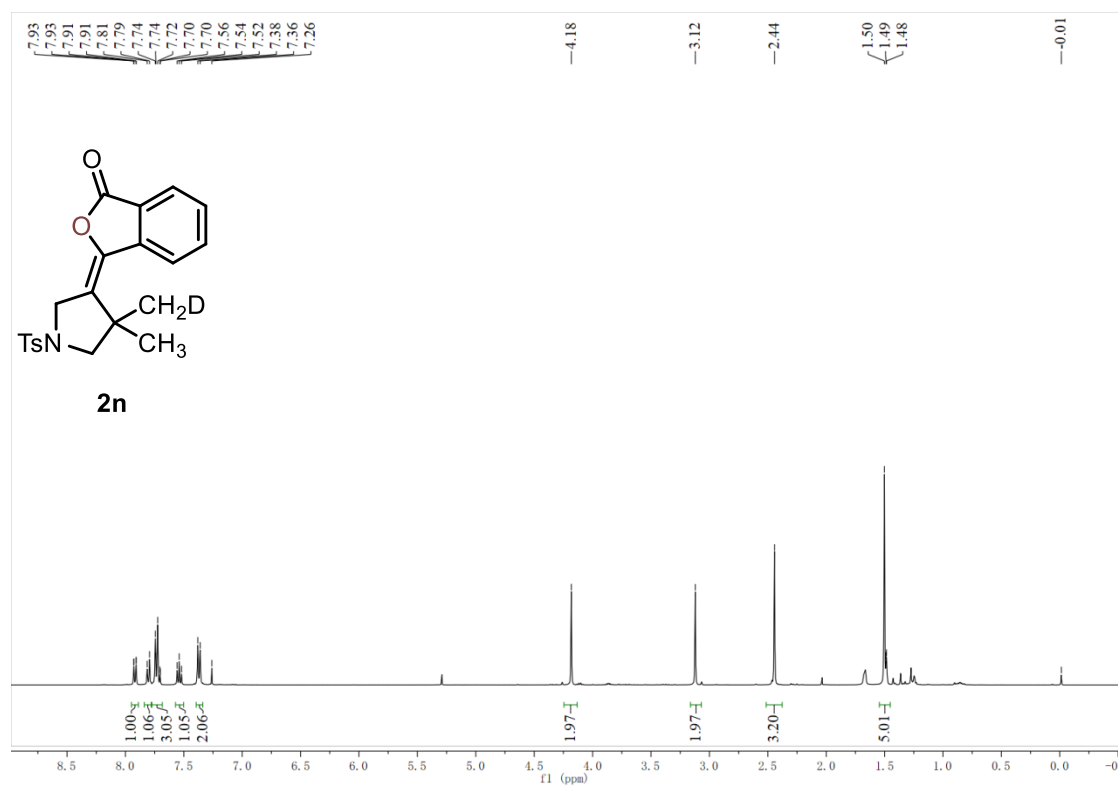 $^{13}\text{C}$  NMR of **2n** (101 MHz,  $\text{CDCl}_3$ )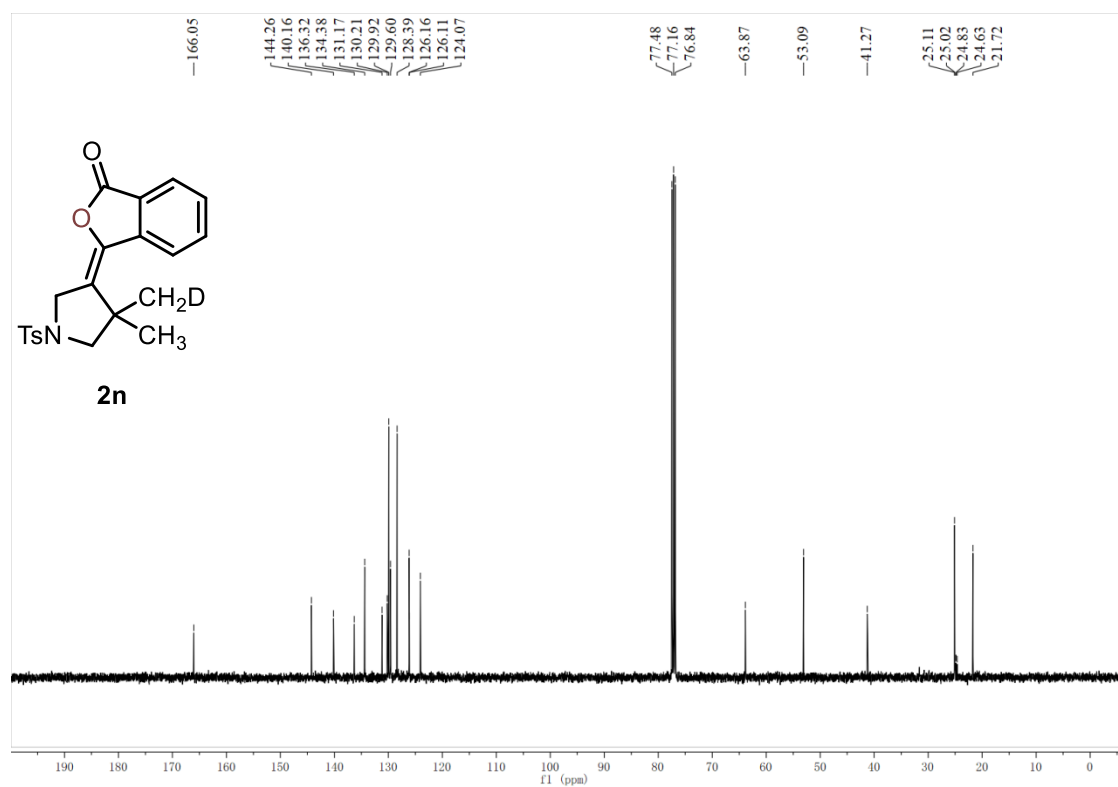

$^1\text{H}$  NMR of **2o** (600 MHz,  $\text{CDCl}_3$ )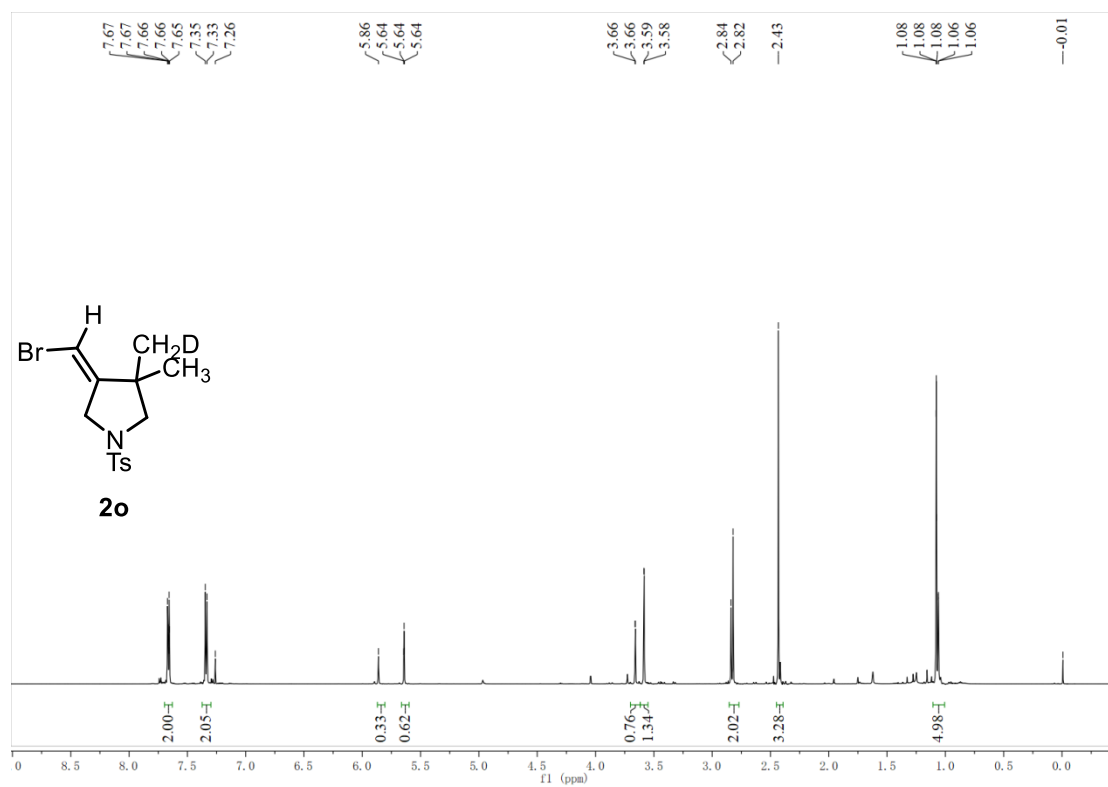 $^{13}\text{C}$  NMR of **2o** (151 MHz,  $\text{CDCl}_3$ )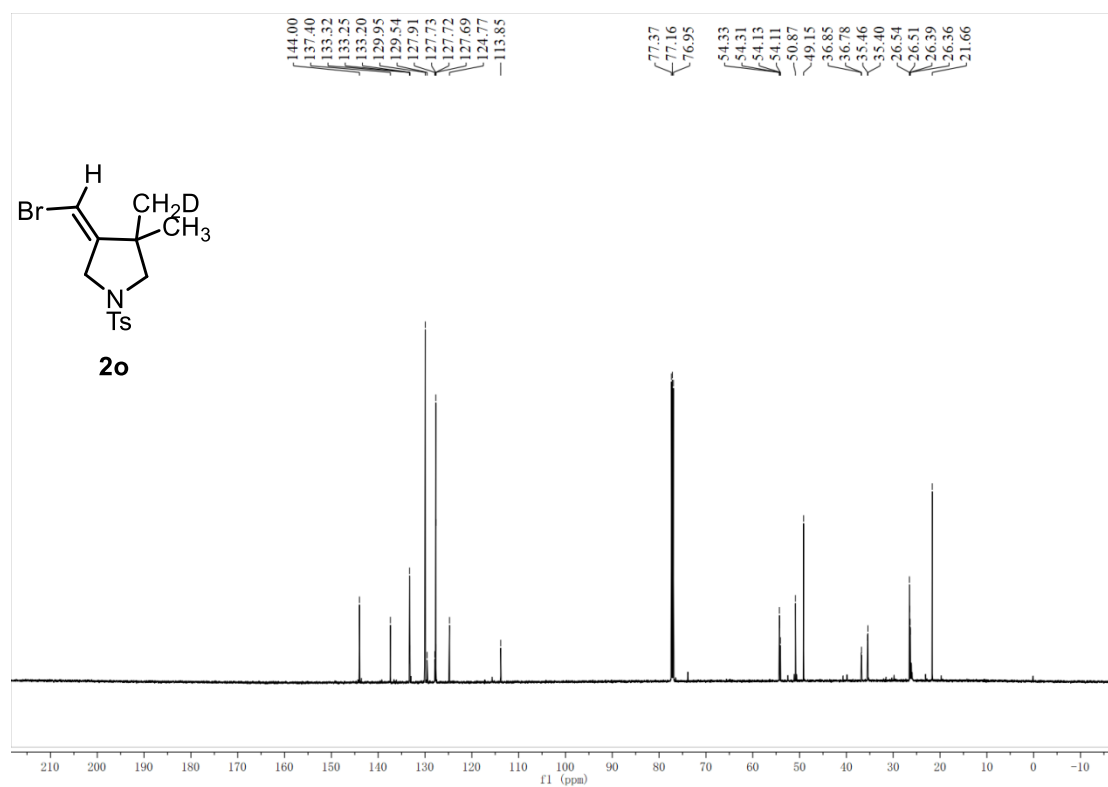

$^1\text{H}$  NMR of **2p** (600 MHz,  $\text{CDCl}_3$ )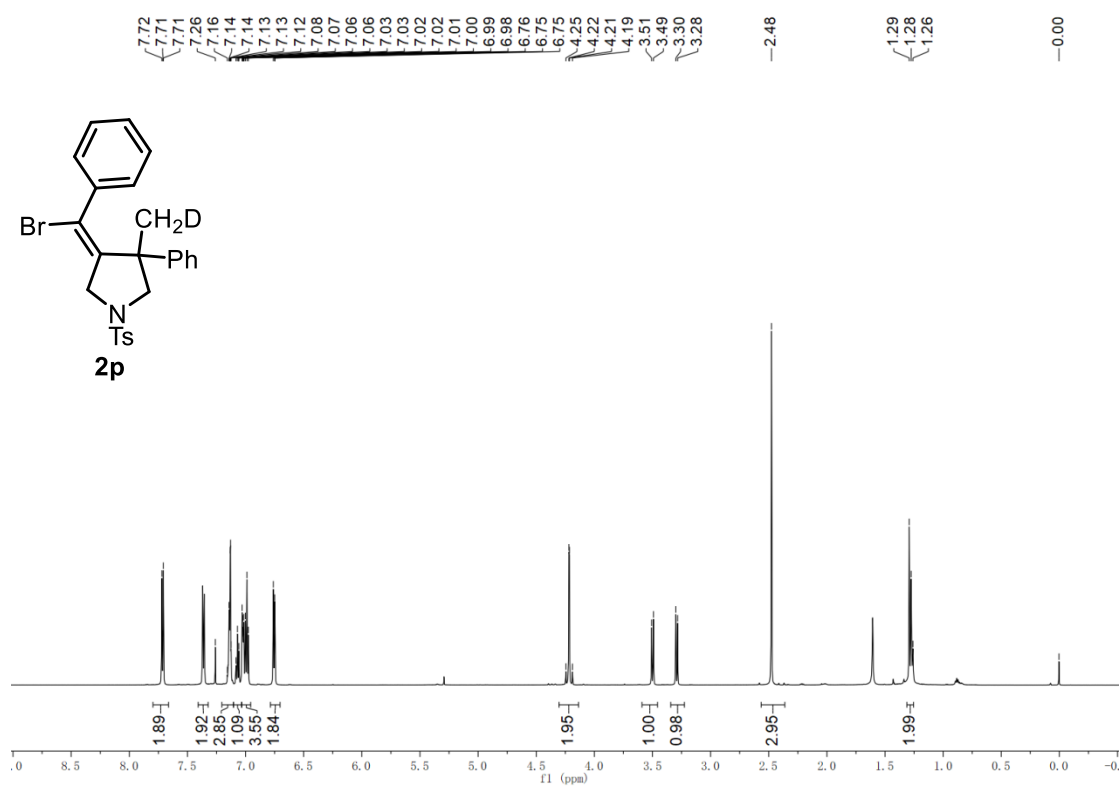 $^{13}\text{C}$  NMR of **2p** (151 MHz,  $\text{CDCl}_3$ )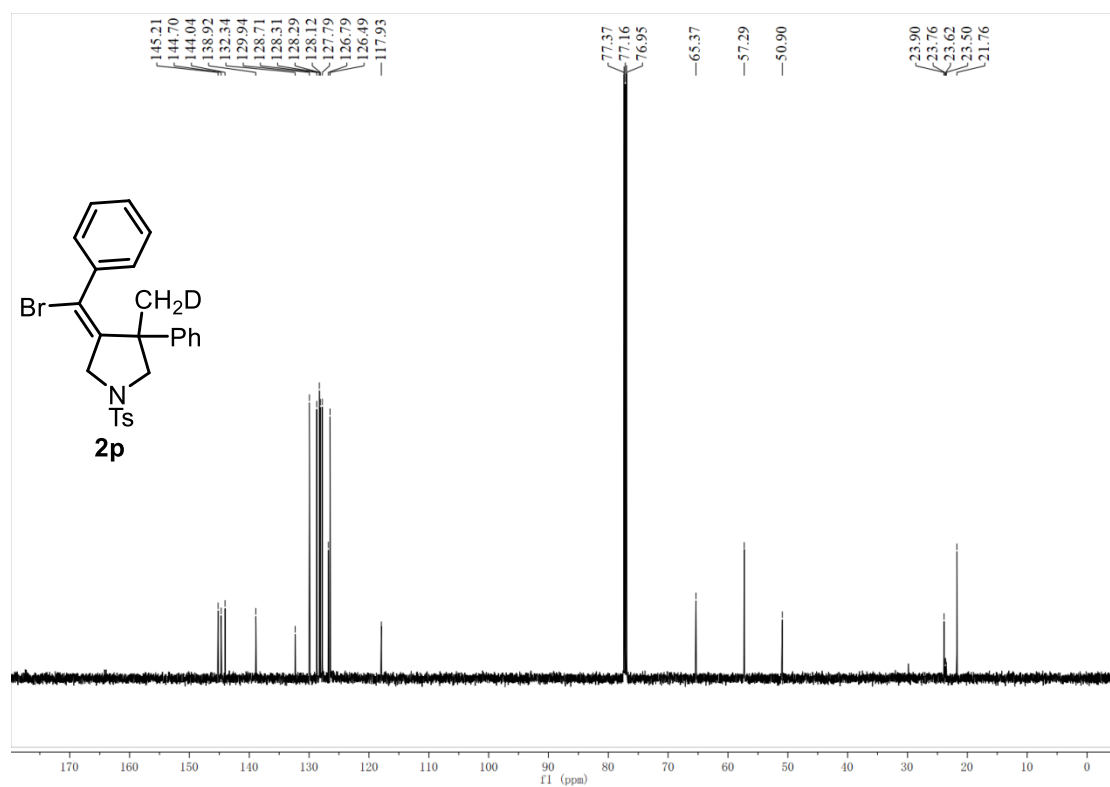

$^1\text{H}$  NMR of **2q** (600 MHz,  $\text{CDCl}_3$ )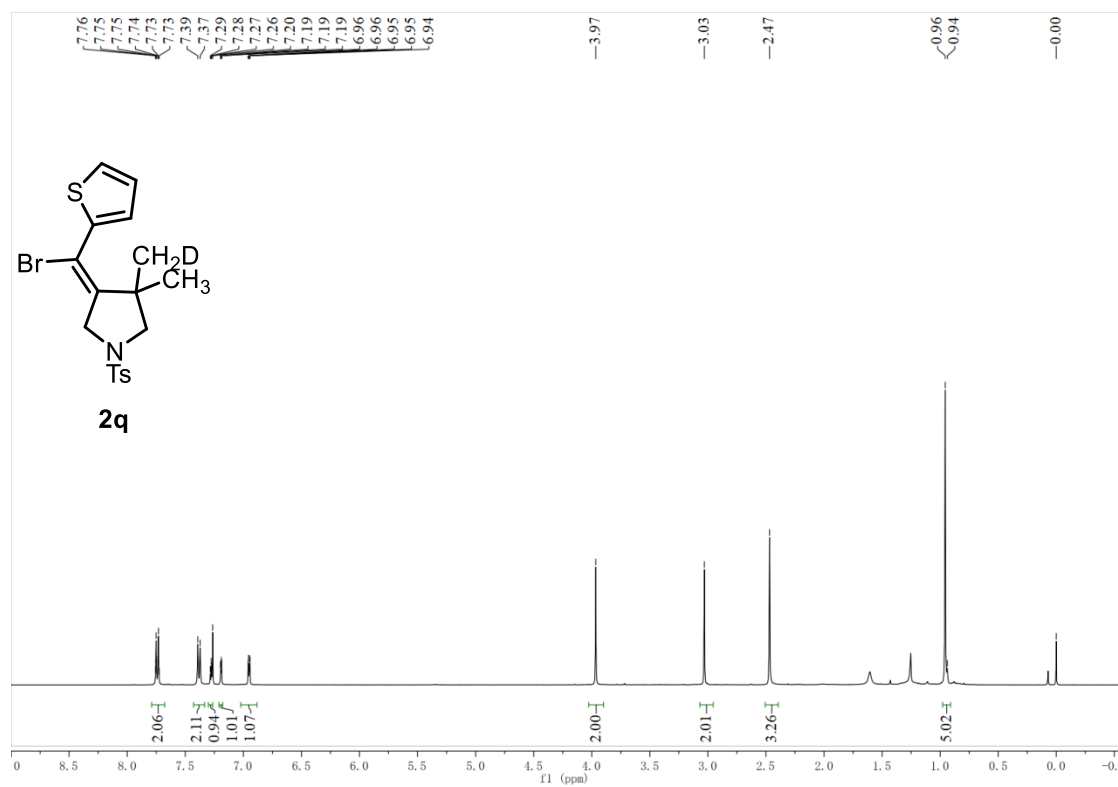 $^{13}\text{C}$  NMR of **2q** (151 MHz,  $\text{CDCl}_3$ )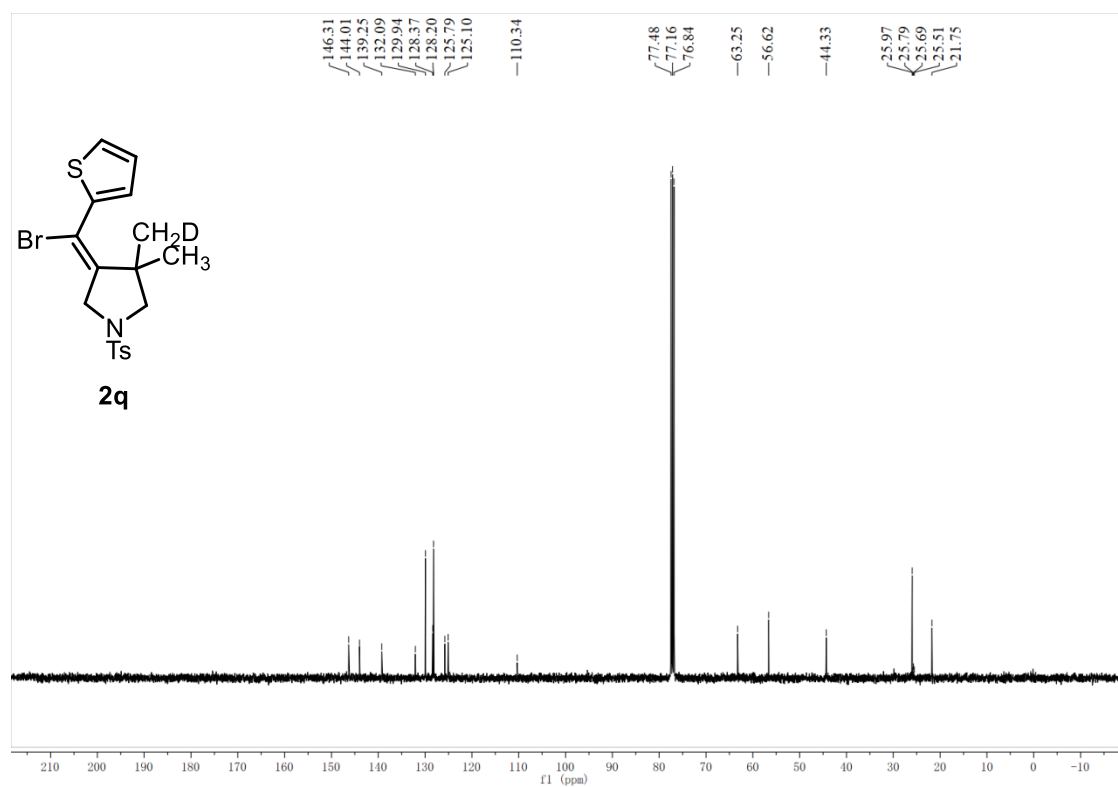





$^1\text{H}$  NMR of **2s** (600 MHz,  $\text{CDCl}_3$ )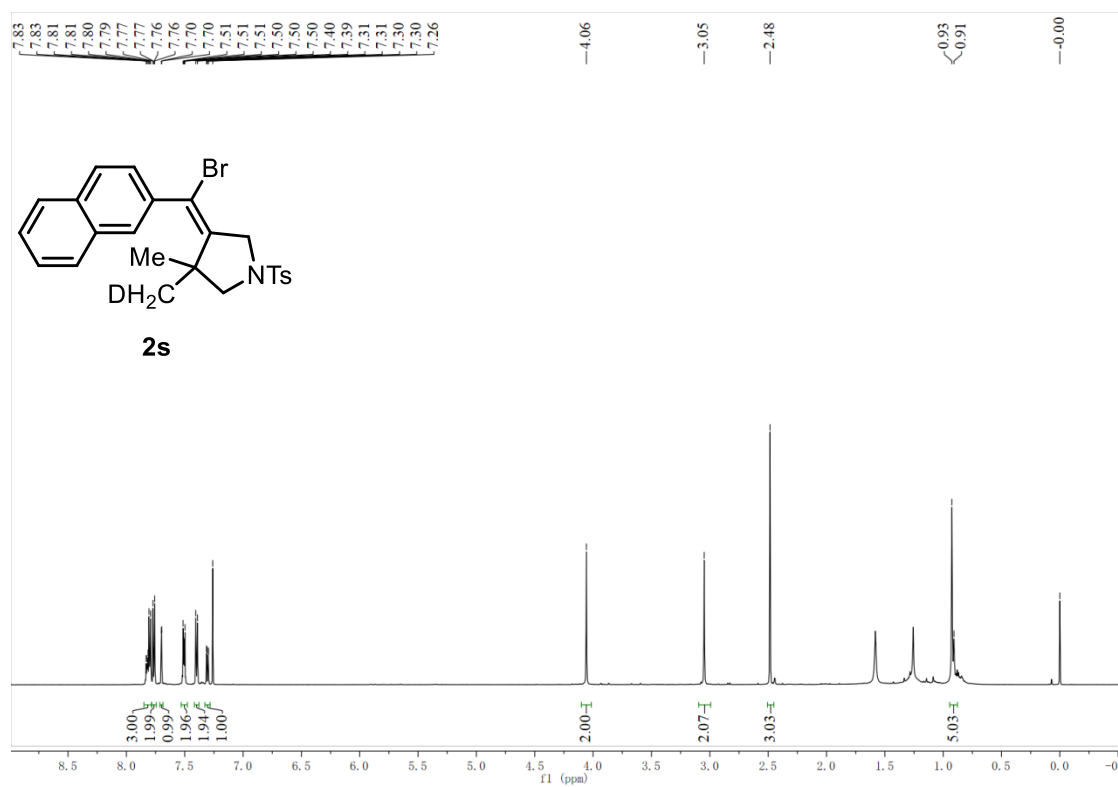 $^{13}\text{C}$  NMR of **2s** (151 MHz,  $\text{CDCl}_3$ )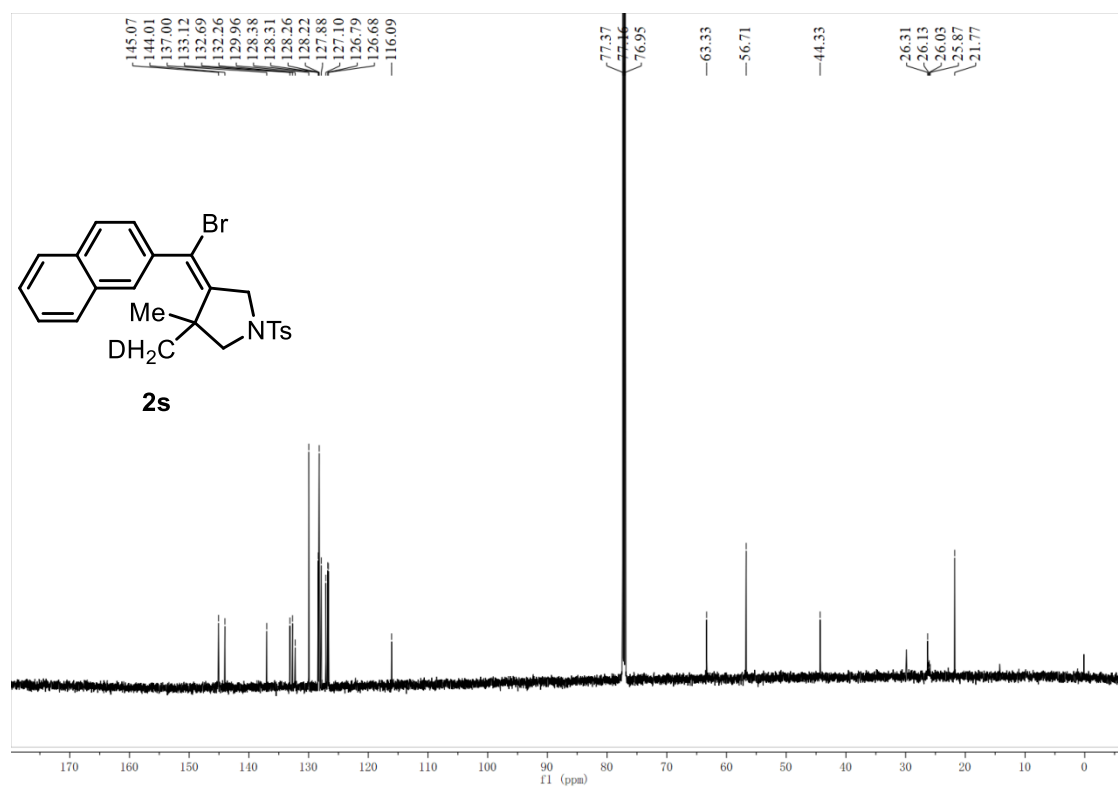

$^1\text{H}$  NMR of **2t** (600 MHz,  $\text{CDCl}_3$ )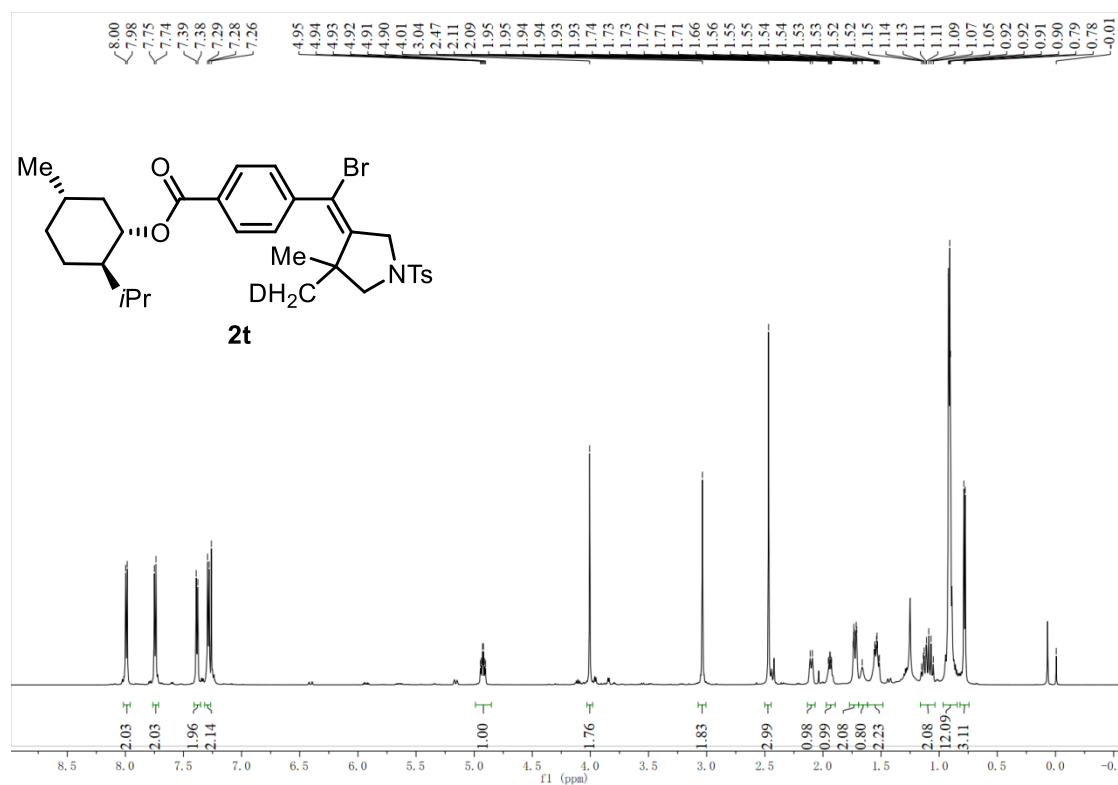 $^{13}\text{C}$  NMR of **2t** (151 MHz,  $\text{CDCl}_3$ )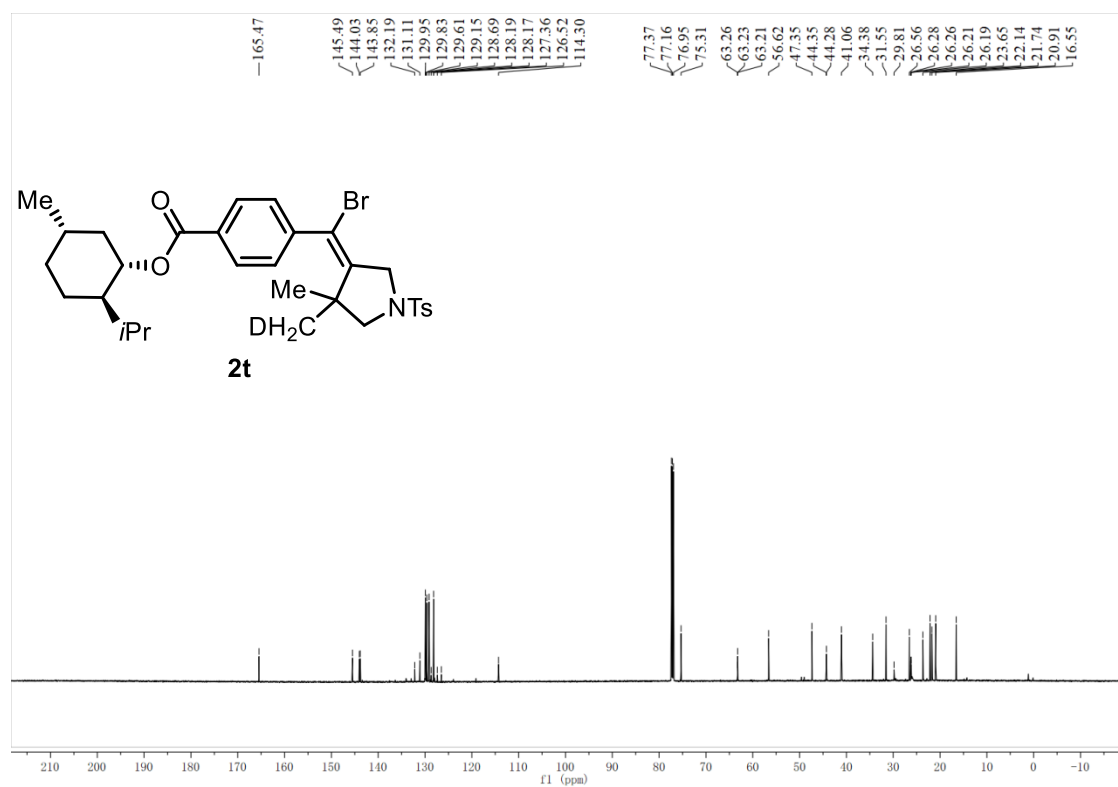

$^1\text{H}$  NMR of **2u** (400 MHz,  $\text{CDCl}_3$ )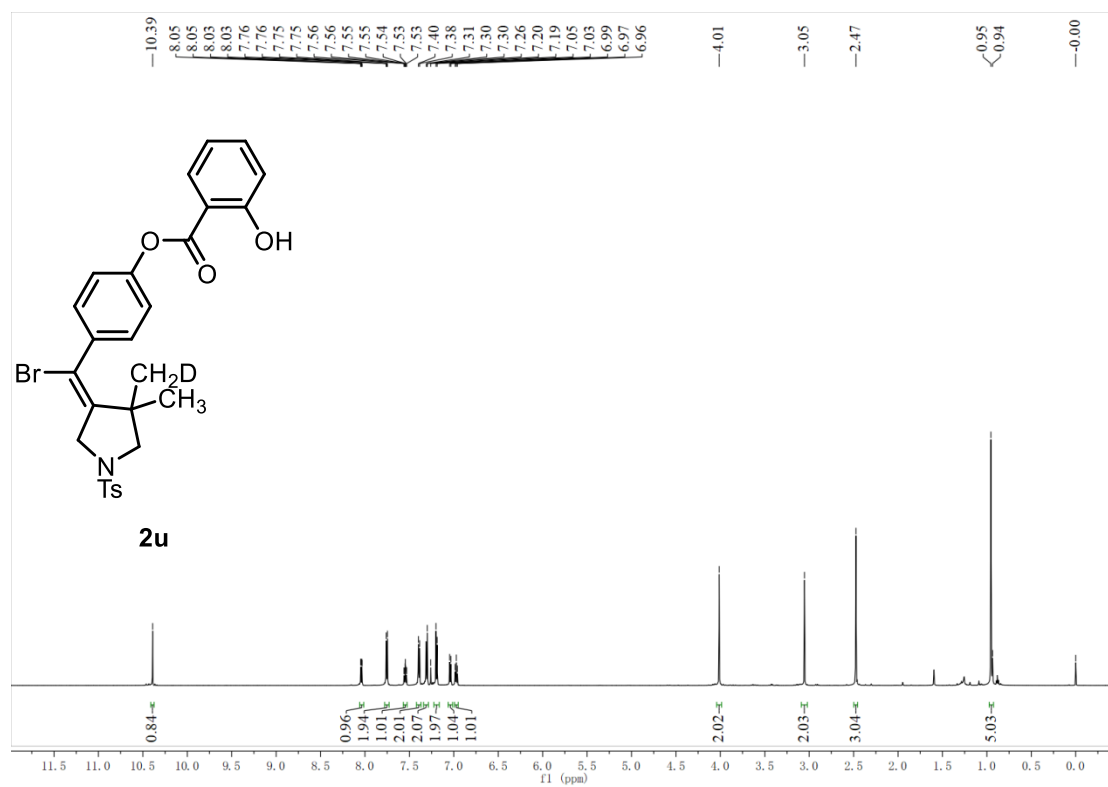 $^{13}\text{C}$  NMR of **2u** (101 MHz,  $\text{CDCl}_3$ )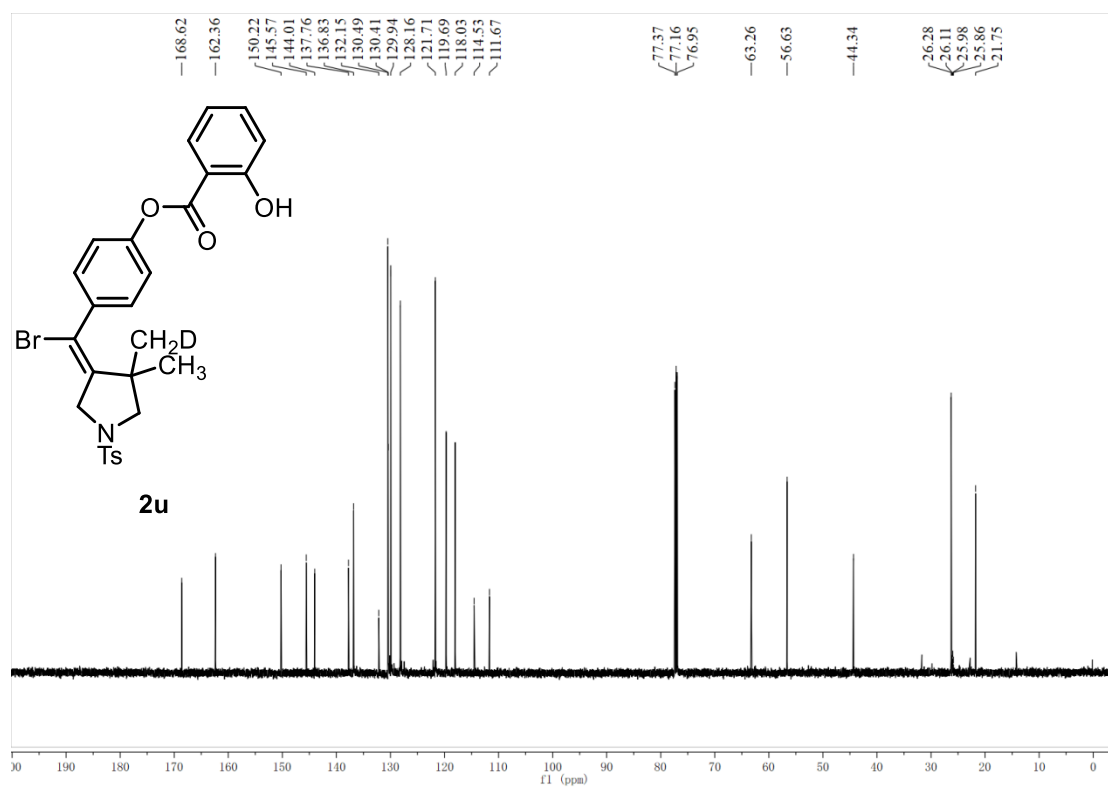

$^1\text{H}$  NMR of **2aa** (600 MHz,  $\text{CDCl}_3$ )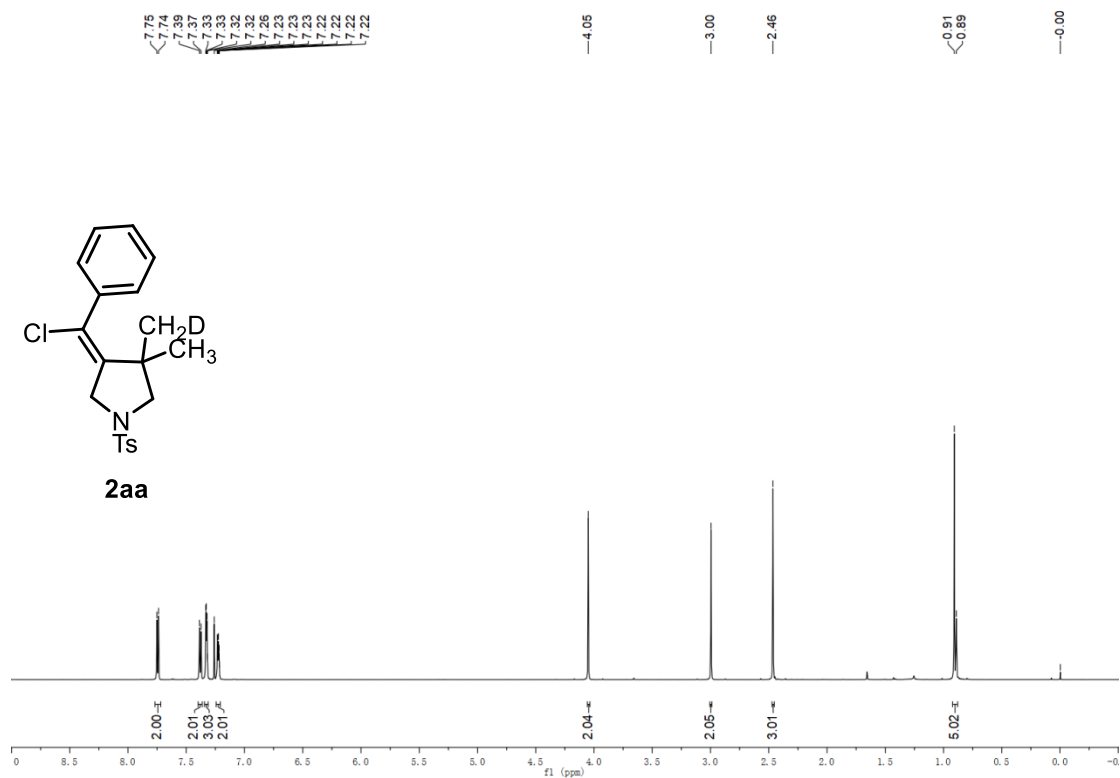 $^{13}\text{C}$  NMR of **2aa** (151 MHz,  $\text{CDCl}_3$ )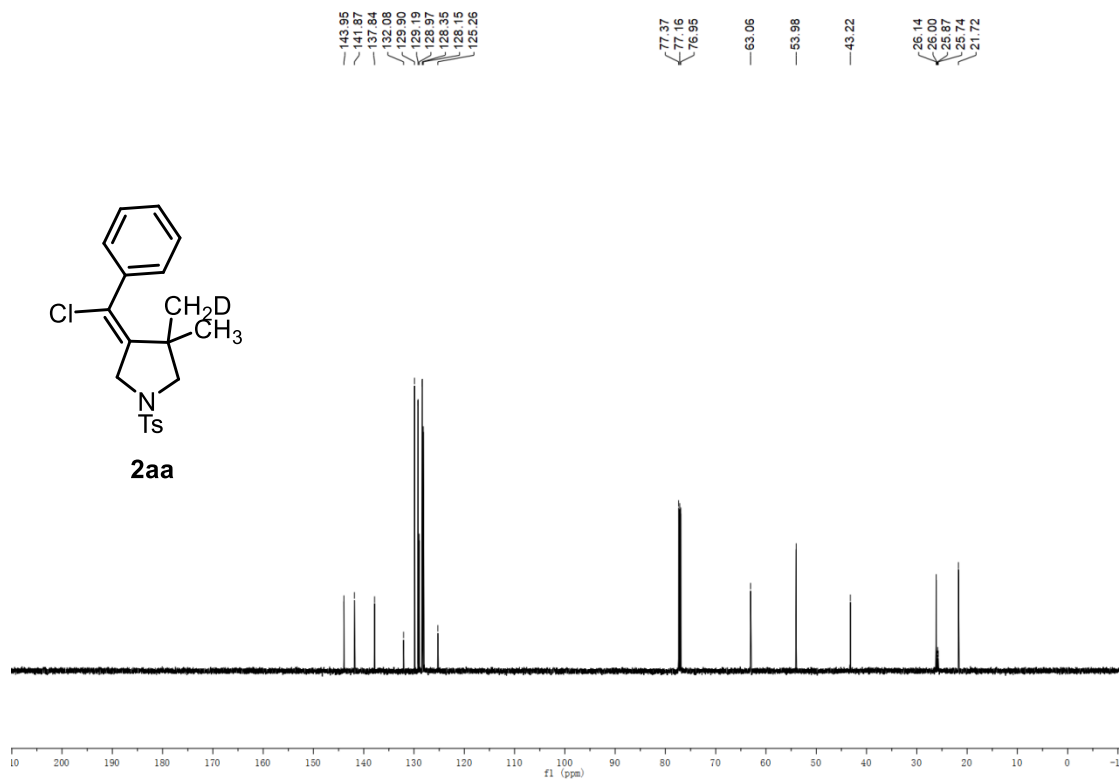

$^1\text{H}$  NMR of **2ab** (600 MHz,  $\text{CDCl}_3$ )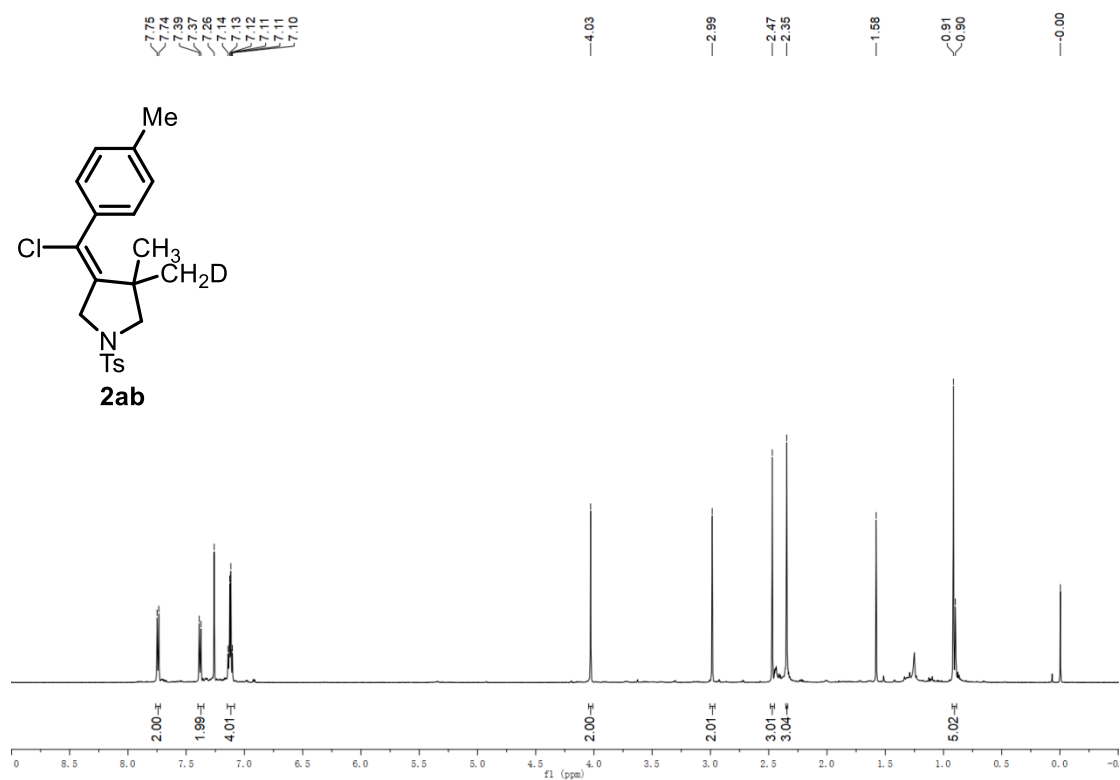 $^{13}\text{C}$  NMR of **2ab** (126 MHz,  $\text{CDCl}_3$ )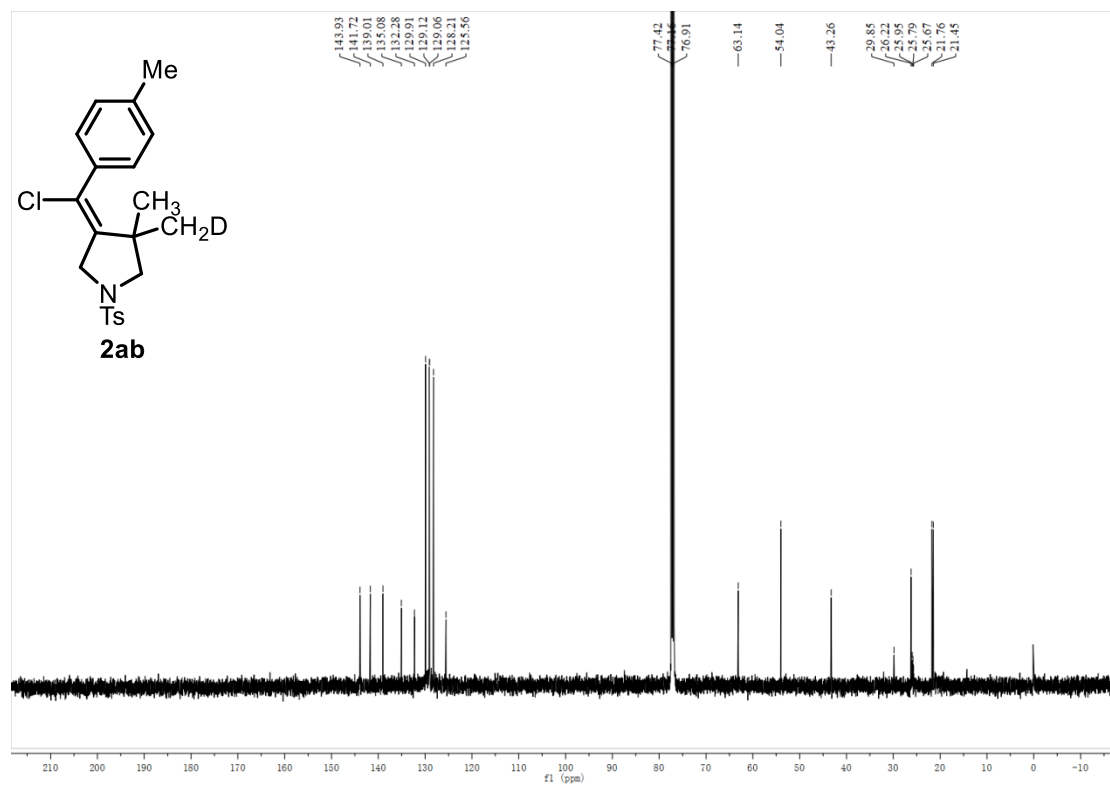

$^1\text{H}$  NMR of **2ac** (600 MHz,  $\text{CDCl}_3$ )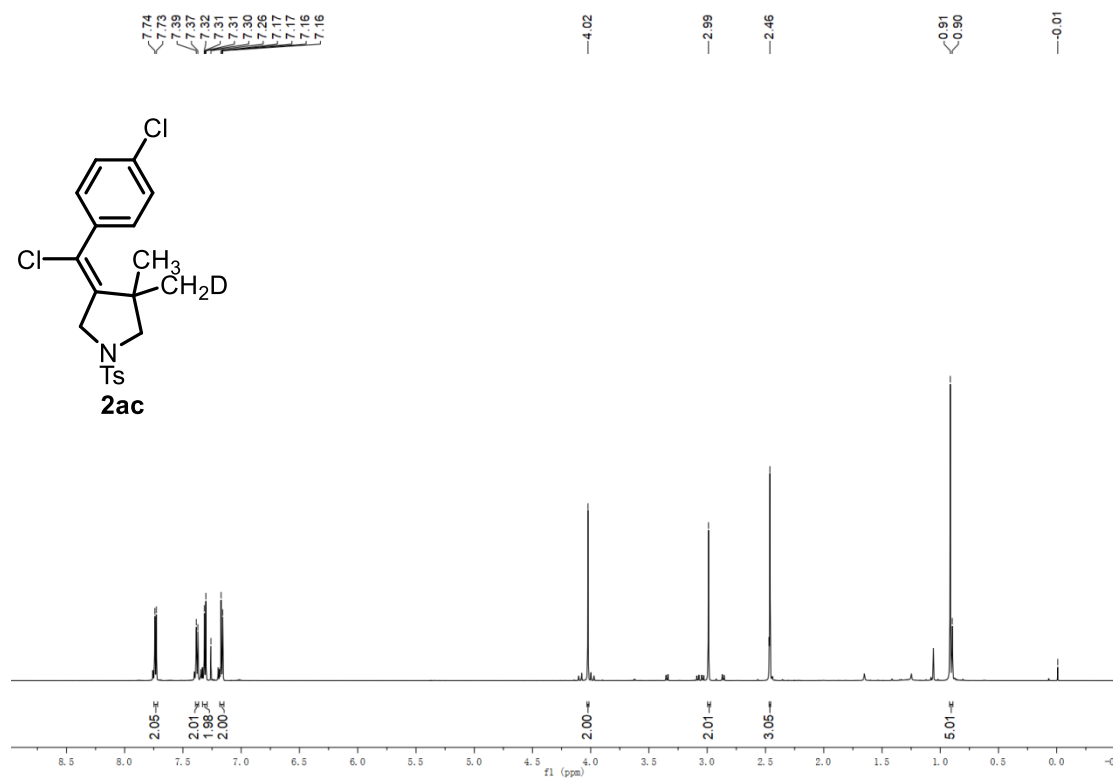 $^{13}\text{C}$  NMR of **2ac** (151 MHz,  $\text{CDCl}_3$ )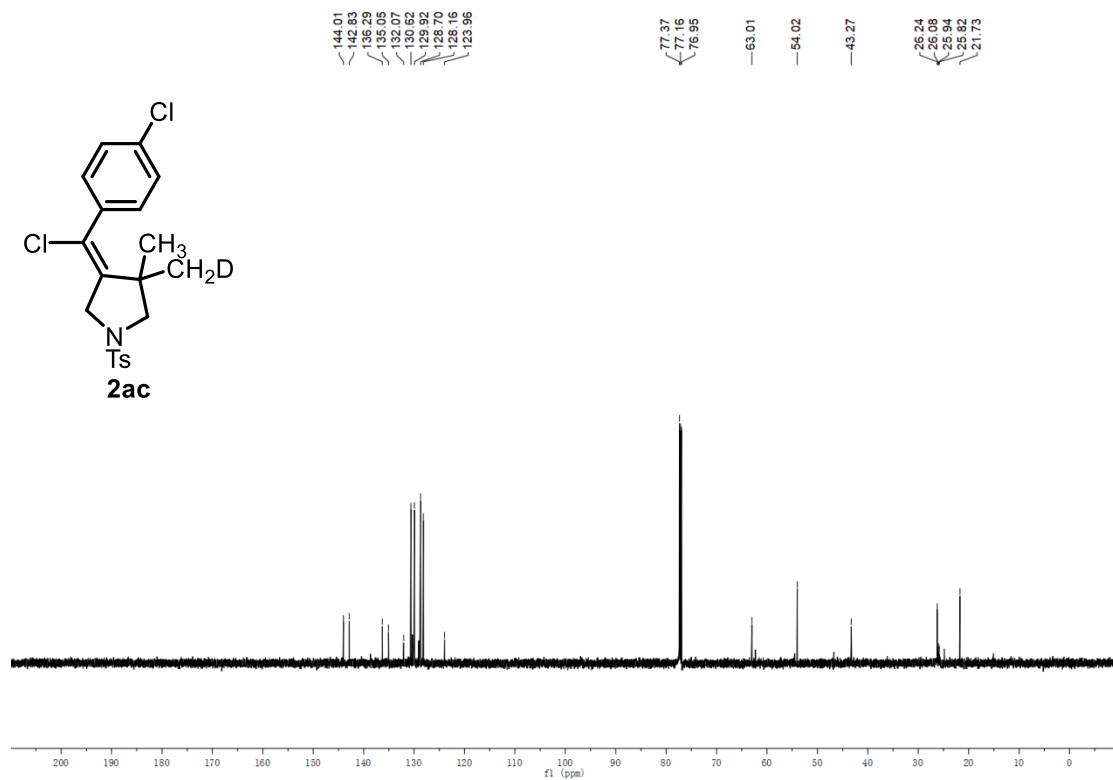

$^1\text{H}$  NMR of **2ad** (600 MHz,  $\text{CDCl}_3$ )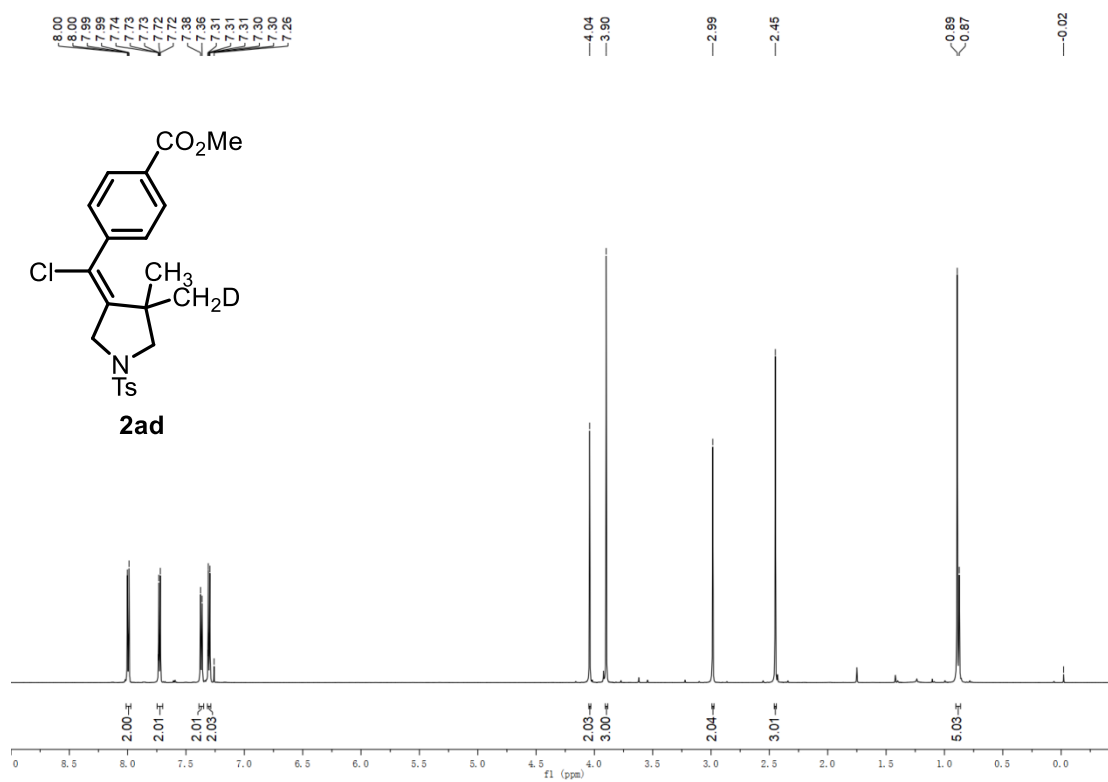 $^{13}\text{C}$  NMR of **2ad** (126 MHz,  $\text{CDCl}_3$ )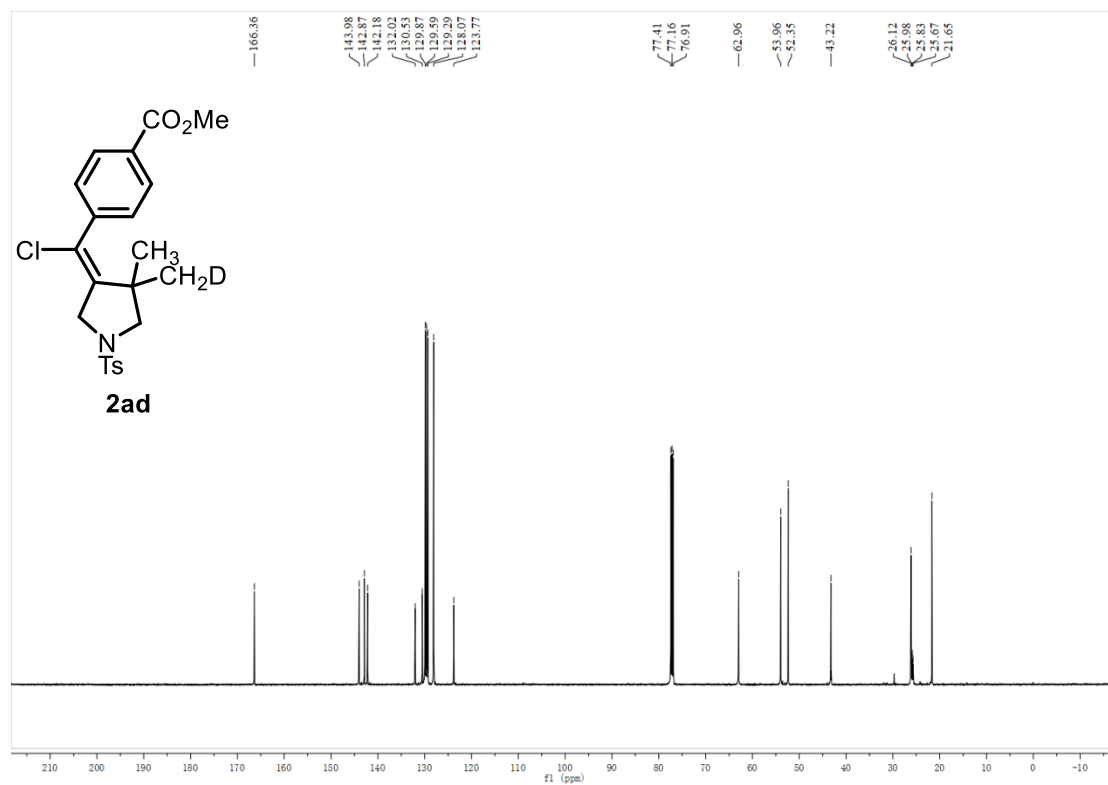



$^1\text{H}$  NMR of **2ae** (600 MHz,  $\text{CDCl}_3$ )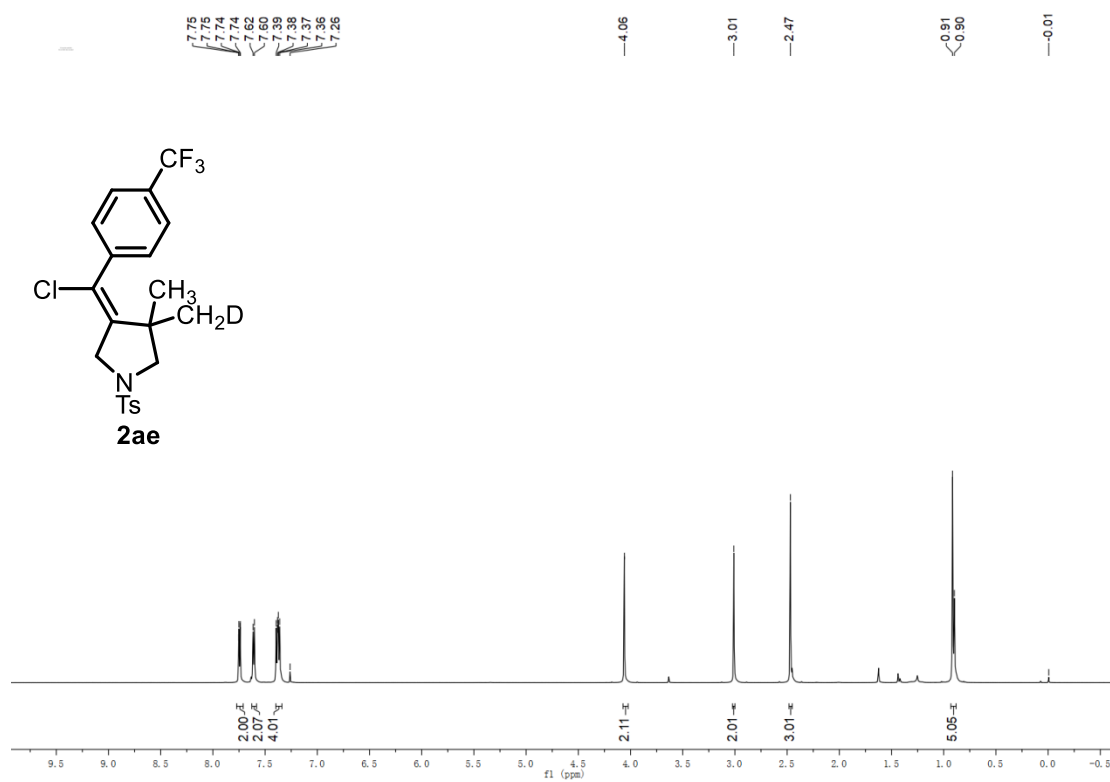 $^{13}\text{C}$  NMR of **2ae** (126 MHz,  $\text{CDCl}_3$ )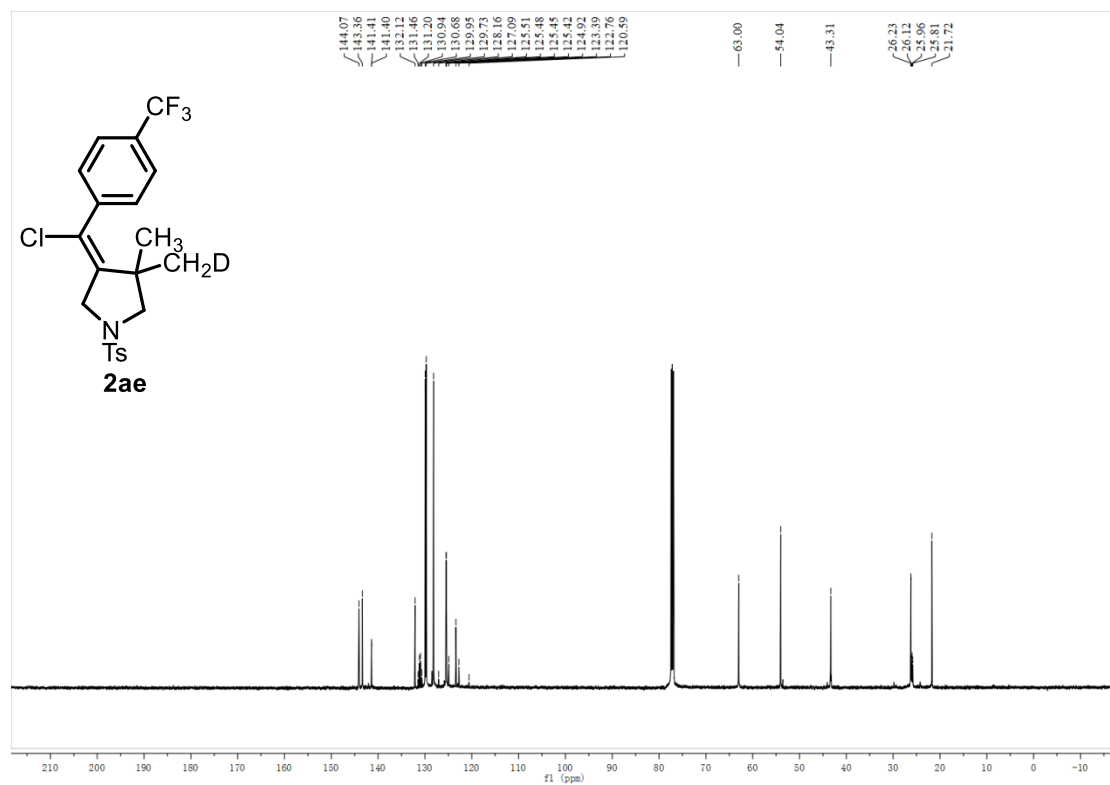

$^{19}\text{F}$  NMR of **2ae** (377 MHz,  $\text{CDCl}_3$ )

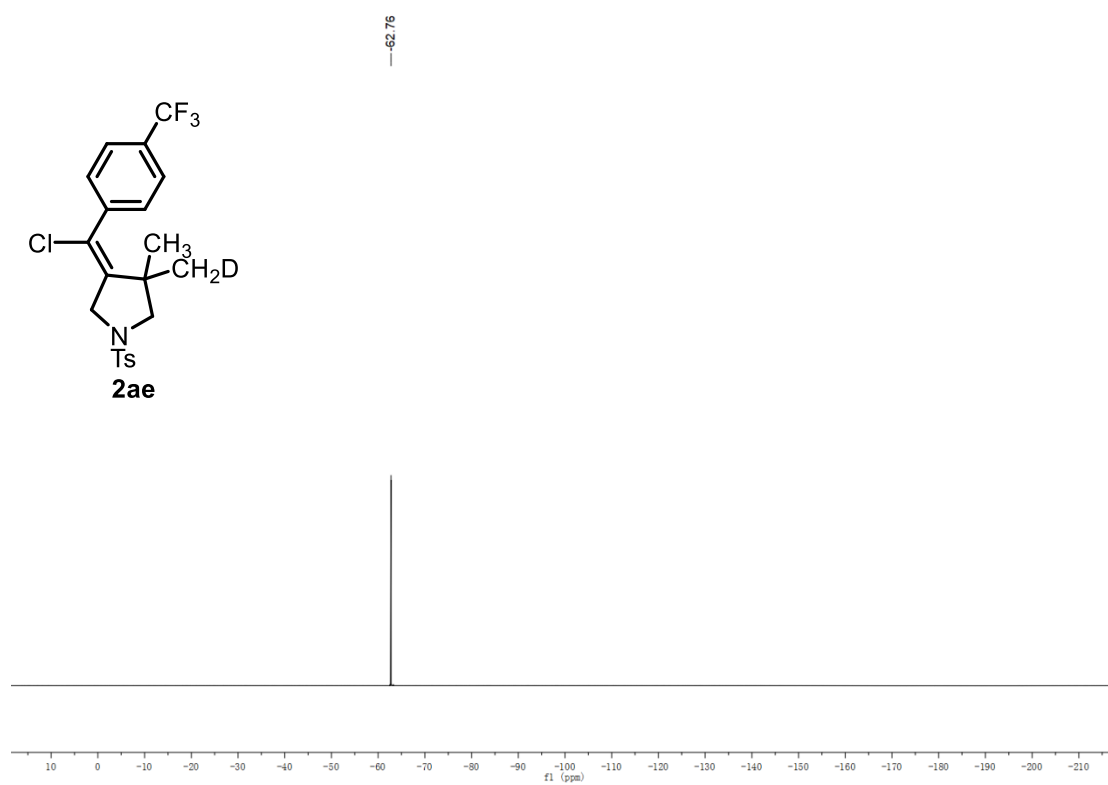

$^1\text{H}$  NMR of **2af** (600 MHz,  $\text{CDCl}_3$ )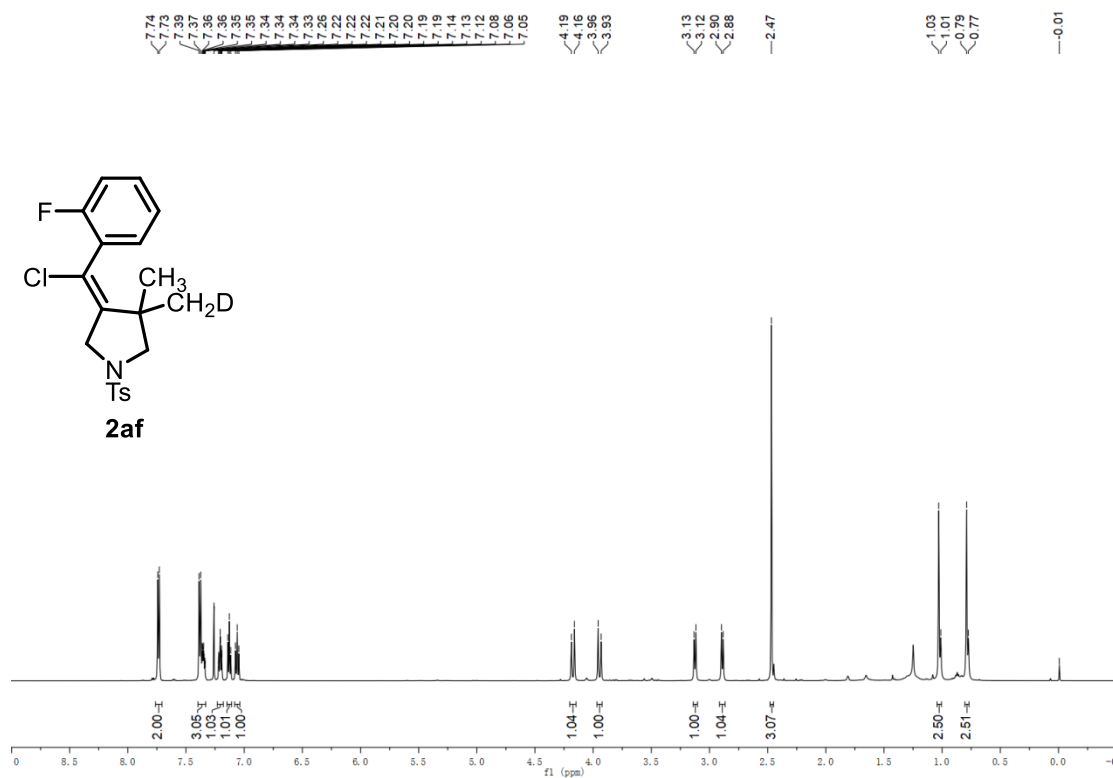 $^{13}\text{C}$  NMR of **2af** (126 MHz,  $\text{CDCl}_3$ )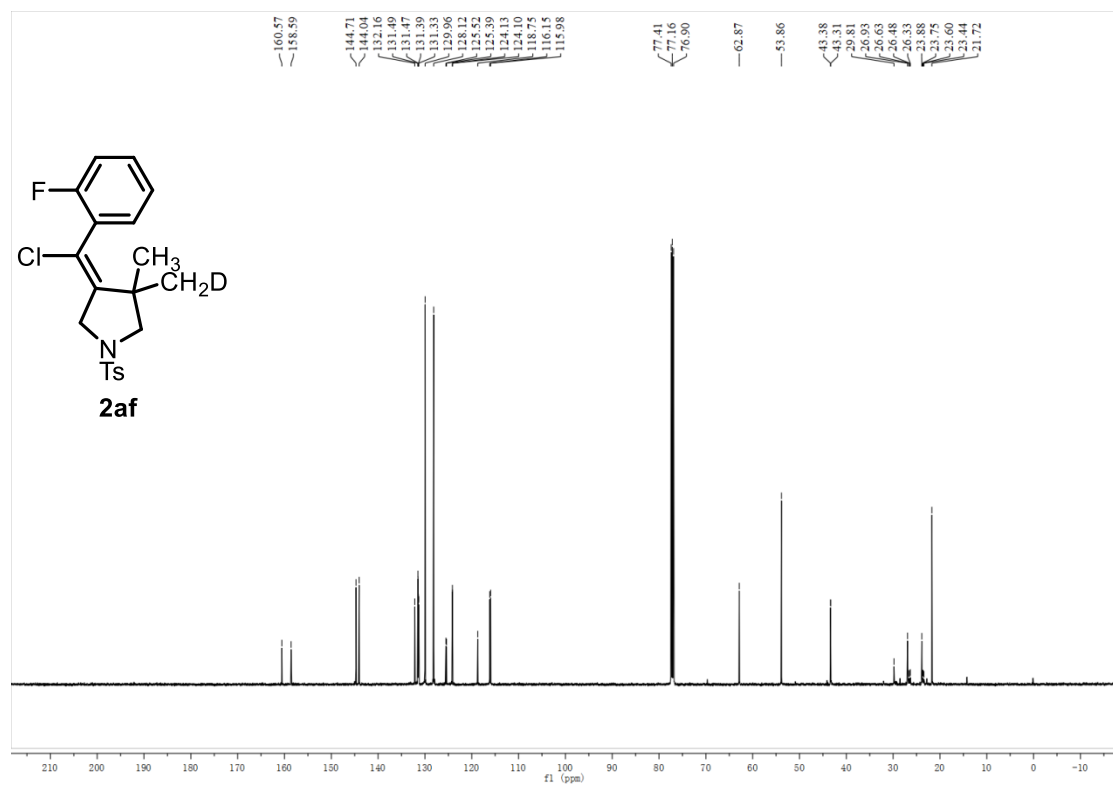

$^{19}\text{F}$  NMR of **2af** (377 MHz,  $\text{CDCl}_3$ )

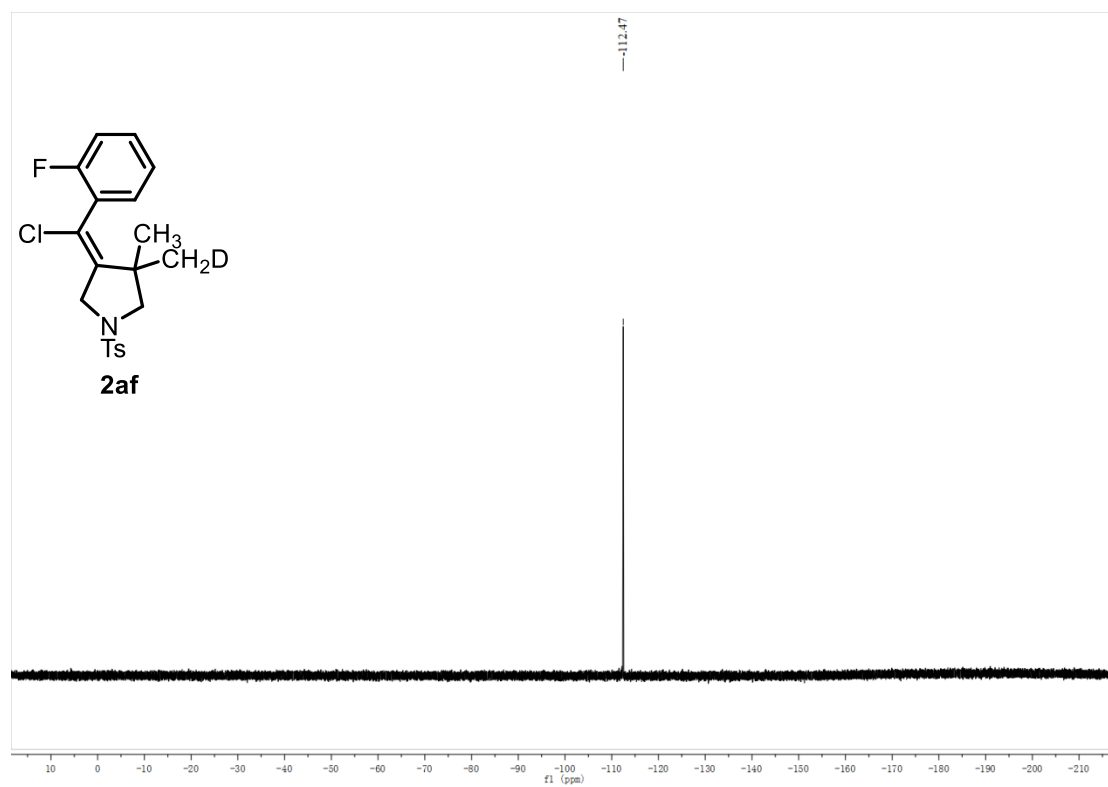

$^1\text{H}$  NMR of **2ag** (600 MHz,  $\text{CDCl}_3$ )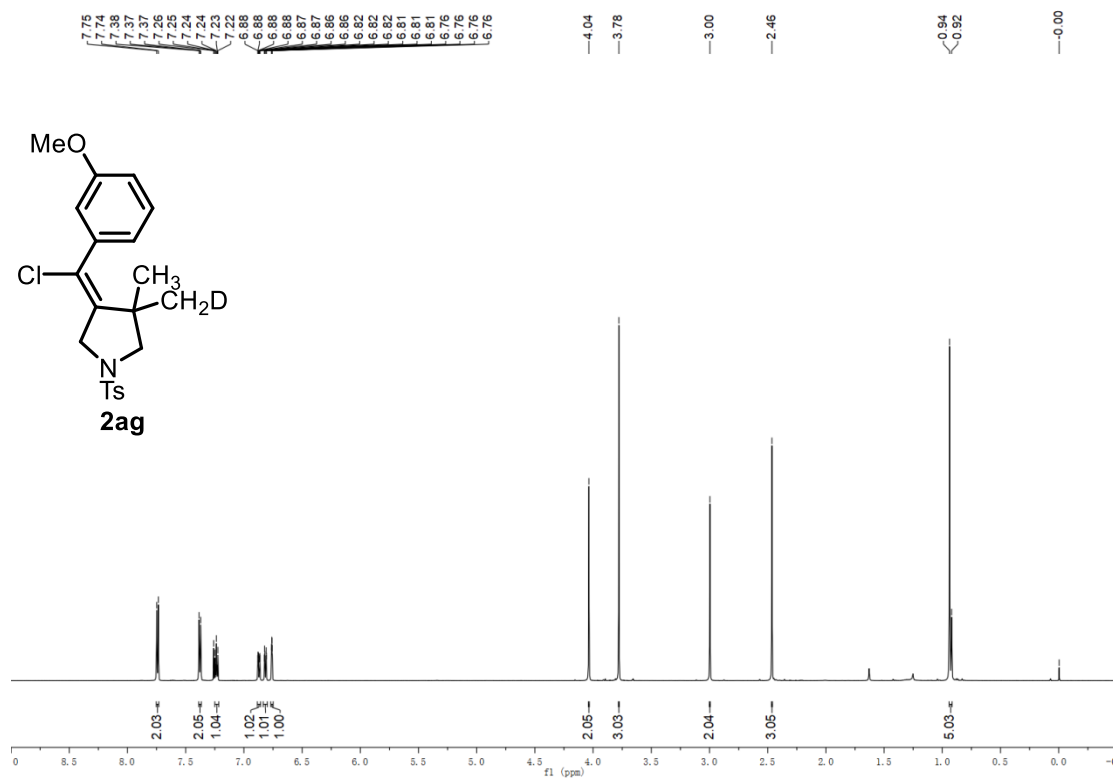 $^{13}\text{C}$  NMR of **2ag** (151 MHz,  $\text{CDCl}_3$ )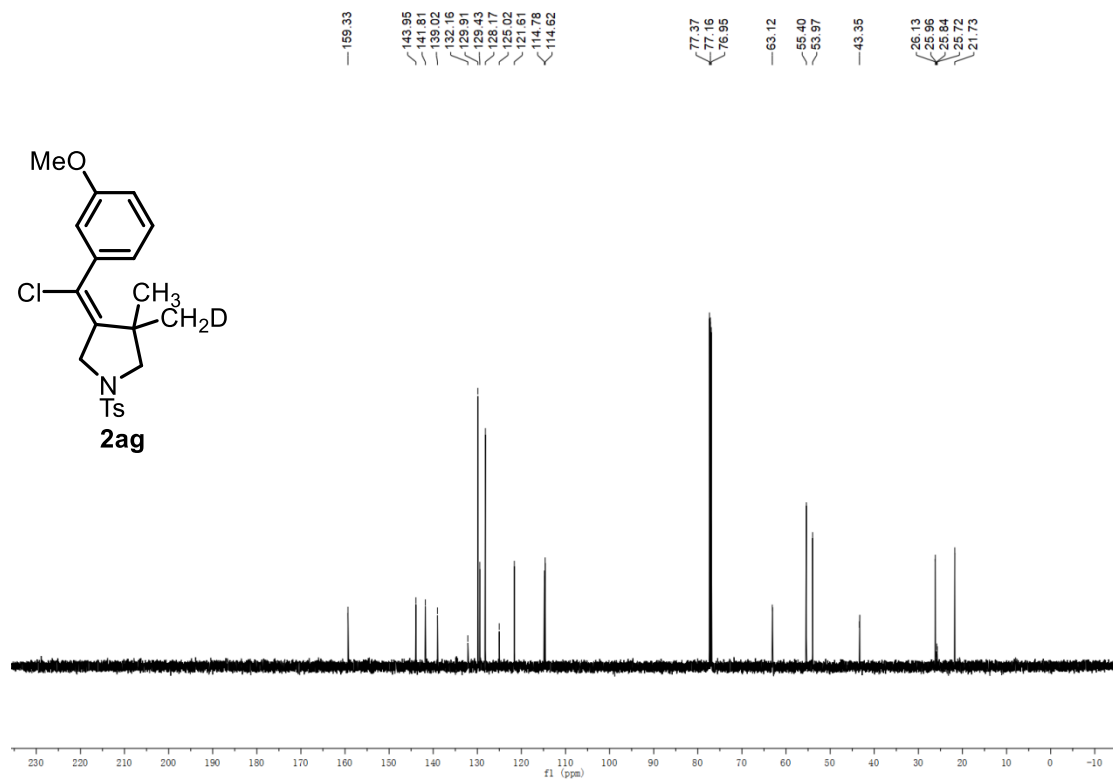

$^1\text{H}$  NMR of **2ah** (600 MHz,  $\text{CDCl}_3$ )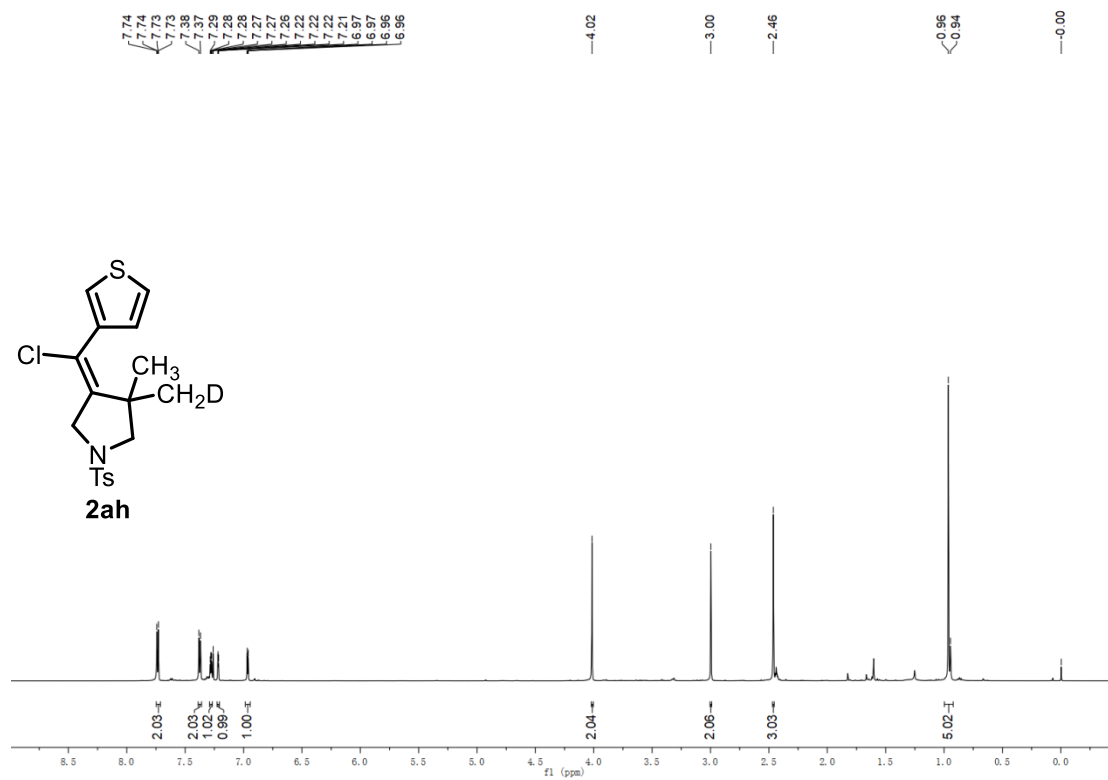 $^{13}\text{C}$  NMR of **2ah** (126 MHz,  $\text{CDCl}_3$ )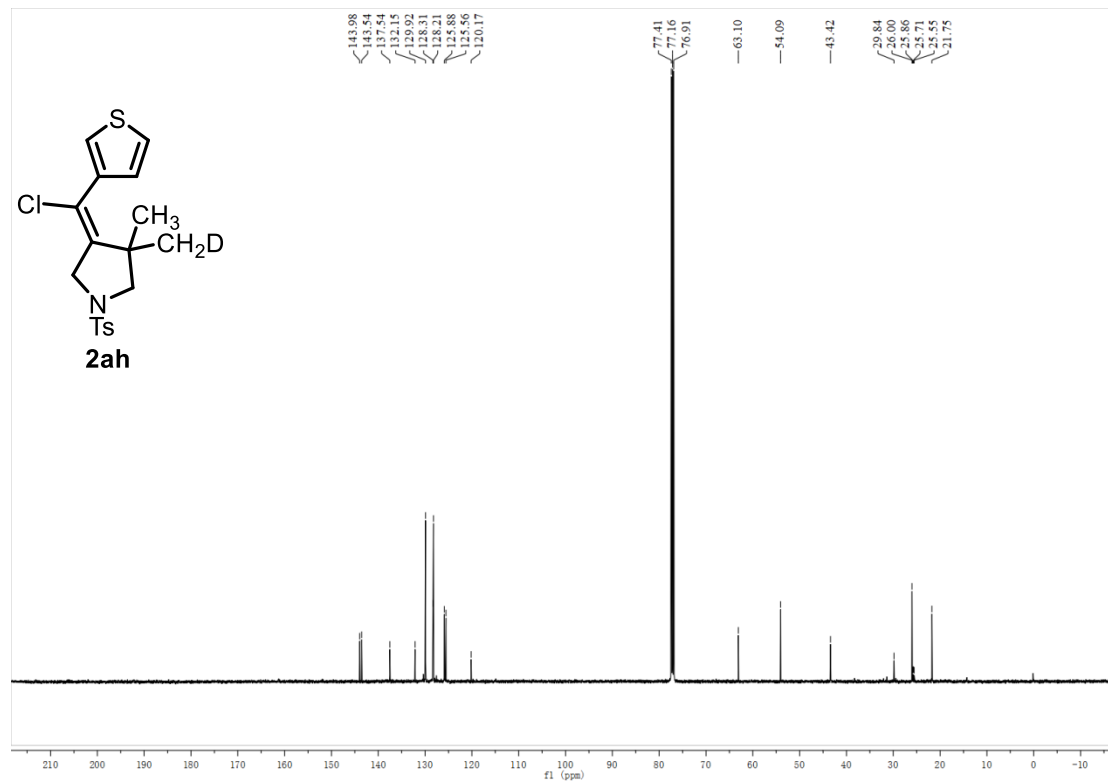

$^1\text{H}$  NMR of **2ai** (600 MHz,  $\text{CDCl}_3$ )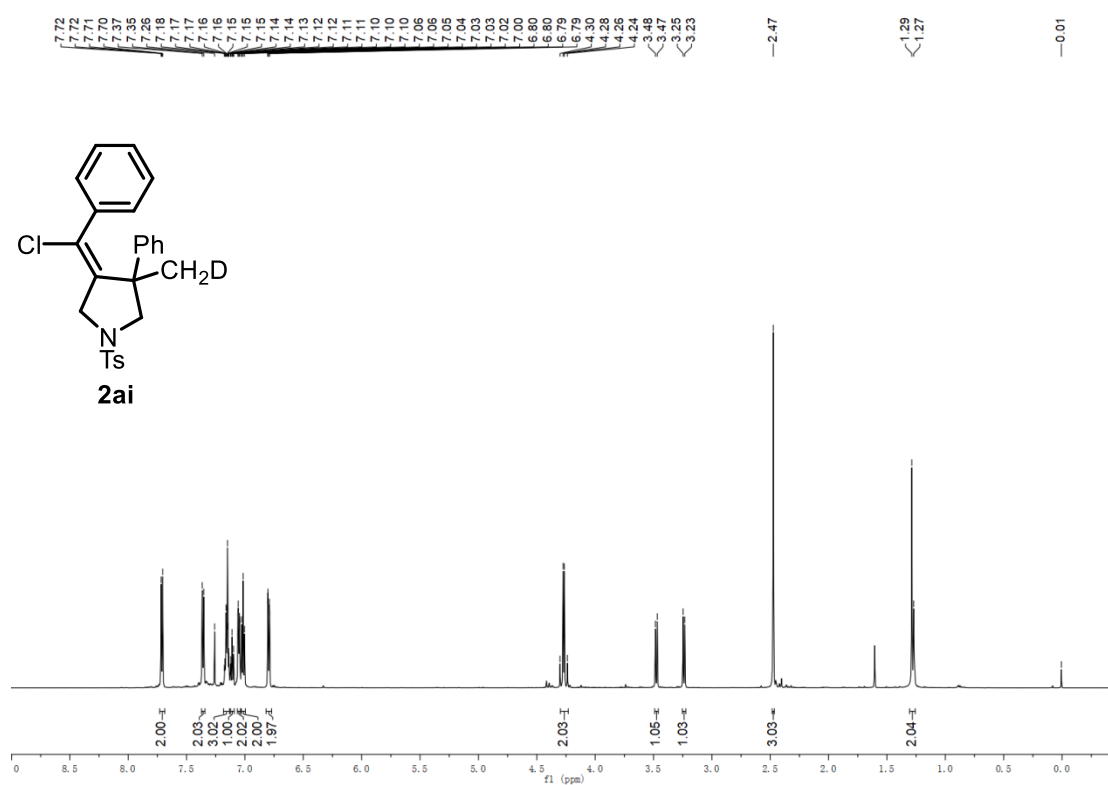 $^{13}\text{C}$  NMR of **2ai** (126 MHz,  $\text{CDCl}_3$ )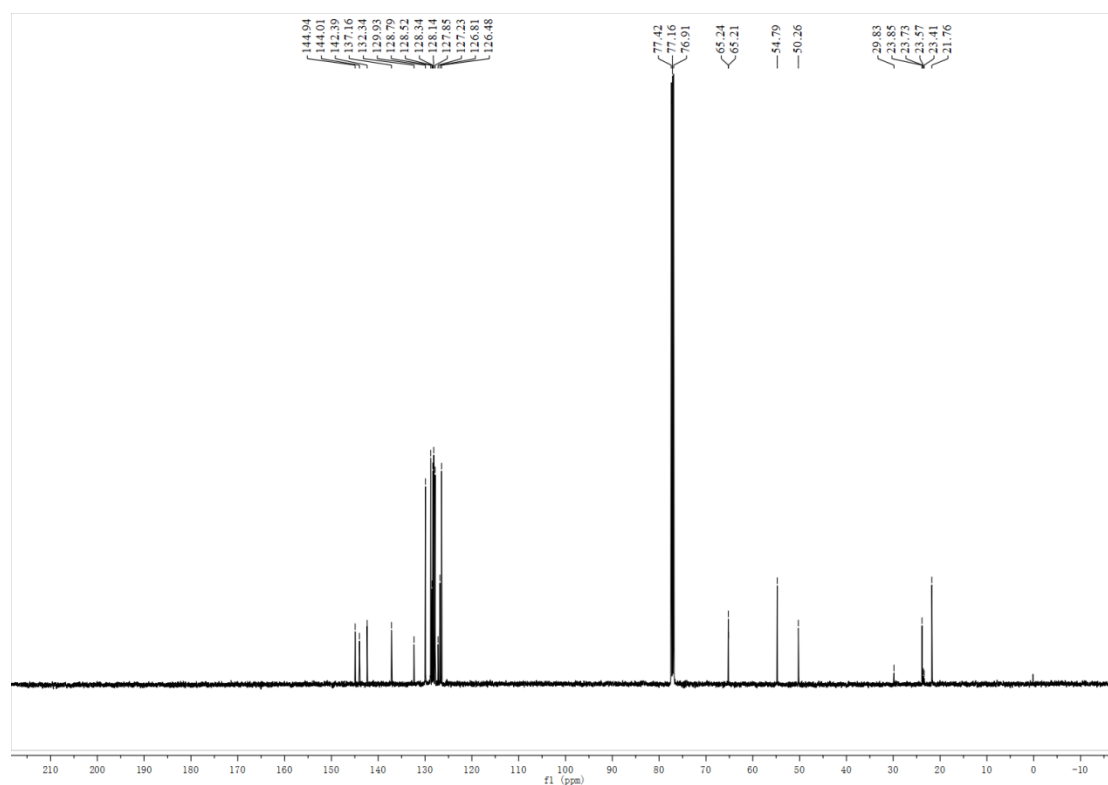

$^1\text{H}$  NMR of **3** (600 MHz,  $\text{CDCl}_3$ )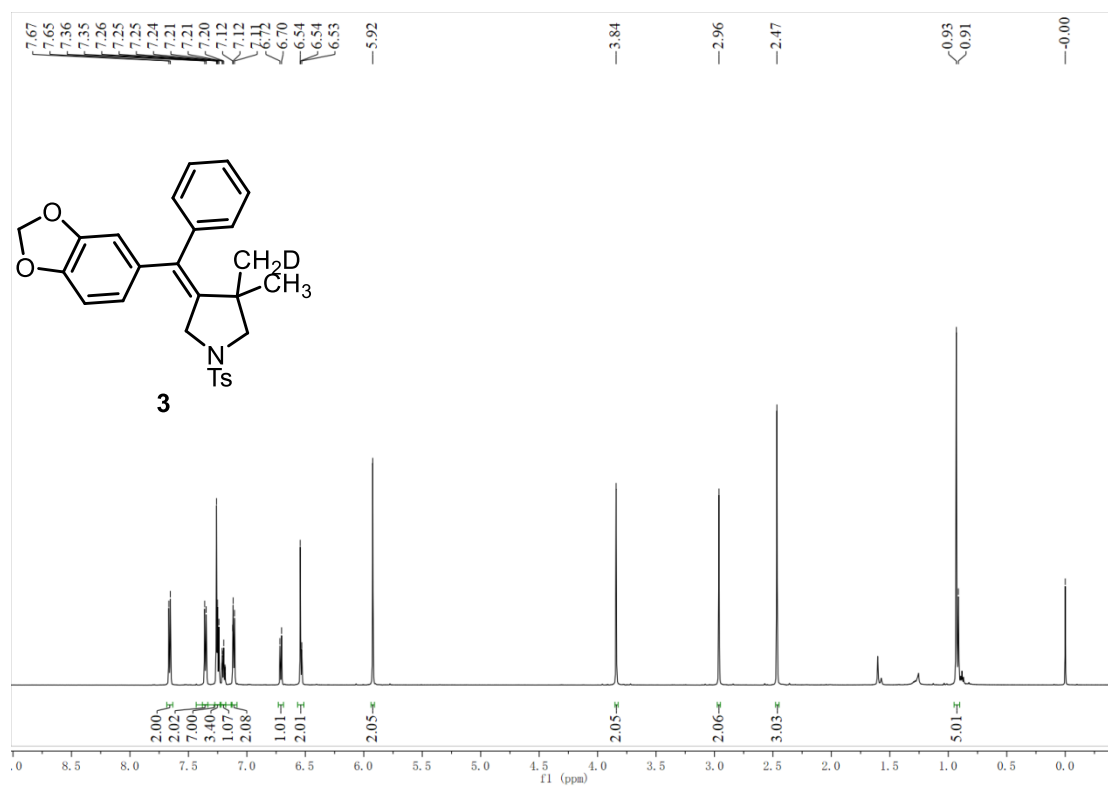 $^{13}\text{C}$  NMR of **3** (151 MHz,  $\text{CDCl}_3$ )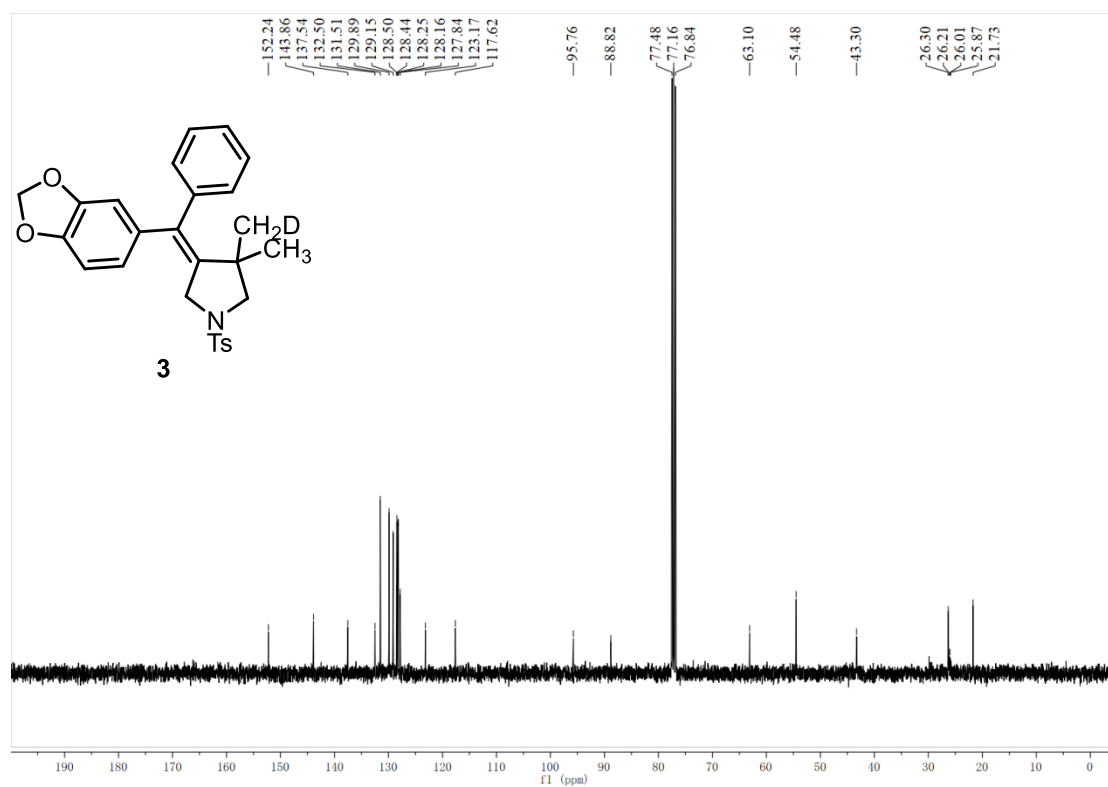



$^1\text{H}$  NMR of **4** (600 MHz,  $\text{CDCl}_3$ )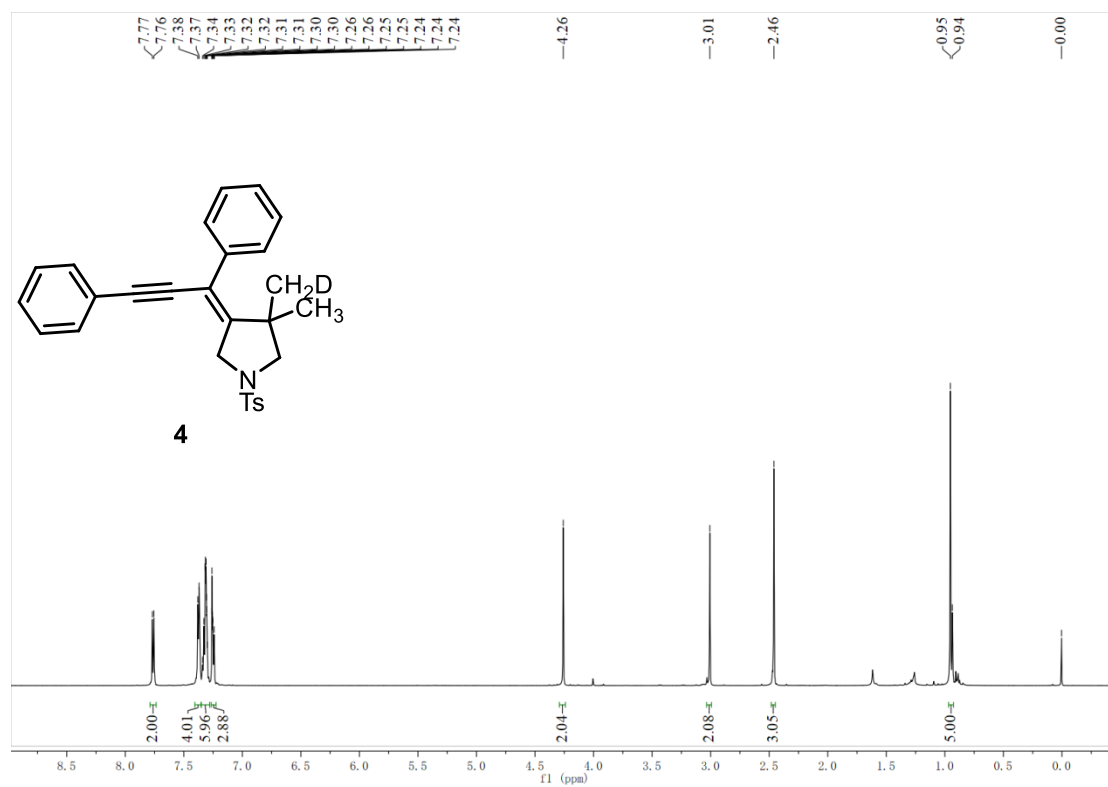 $^{13}\text{C}$  NMR of **4** (151 MHz,  $\text{CDCl}_3$ )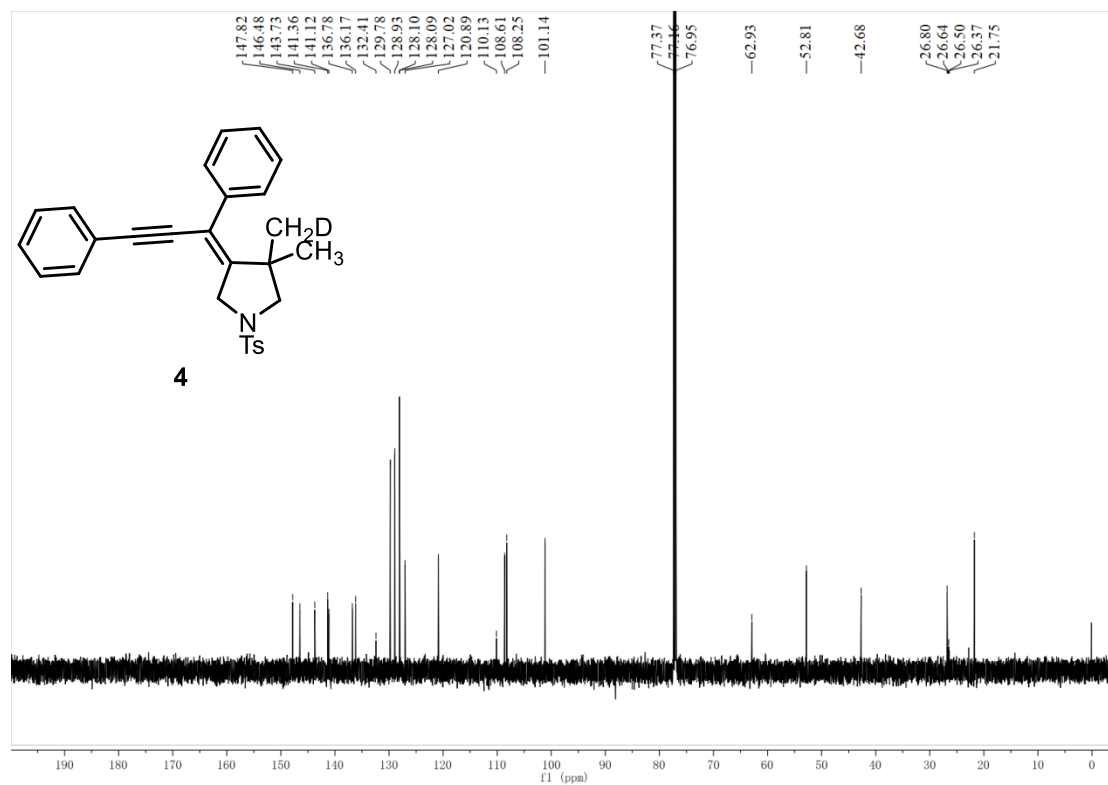

$^1\text{H}$  NMR of **2a'** (400 MHz,  $\text{CDCl}_3$ )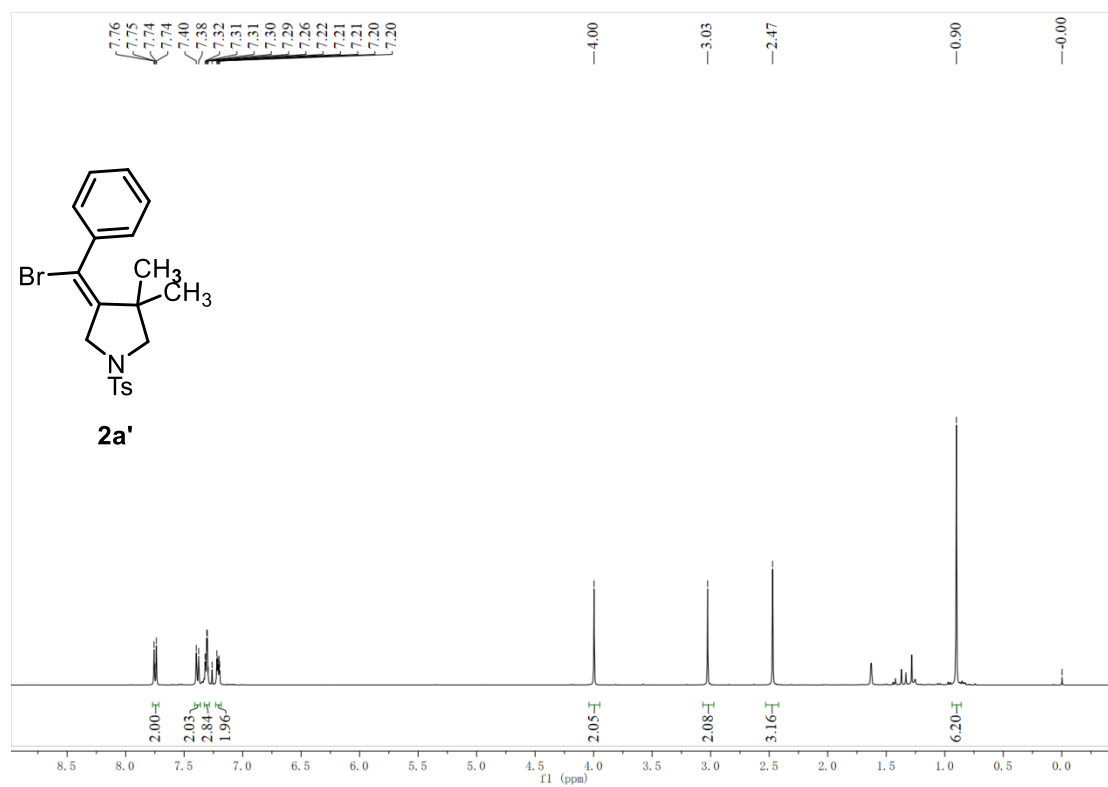 $^{13}\text{C}$  NMR of **2a'** (101 MHz,  $\text{CDCl}_3$ )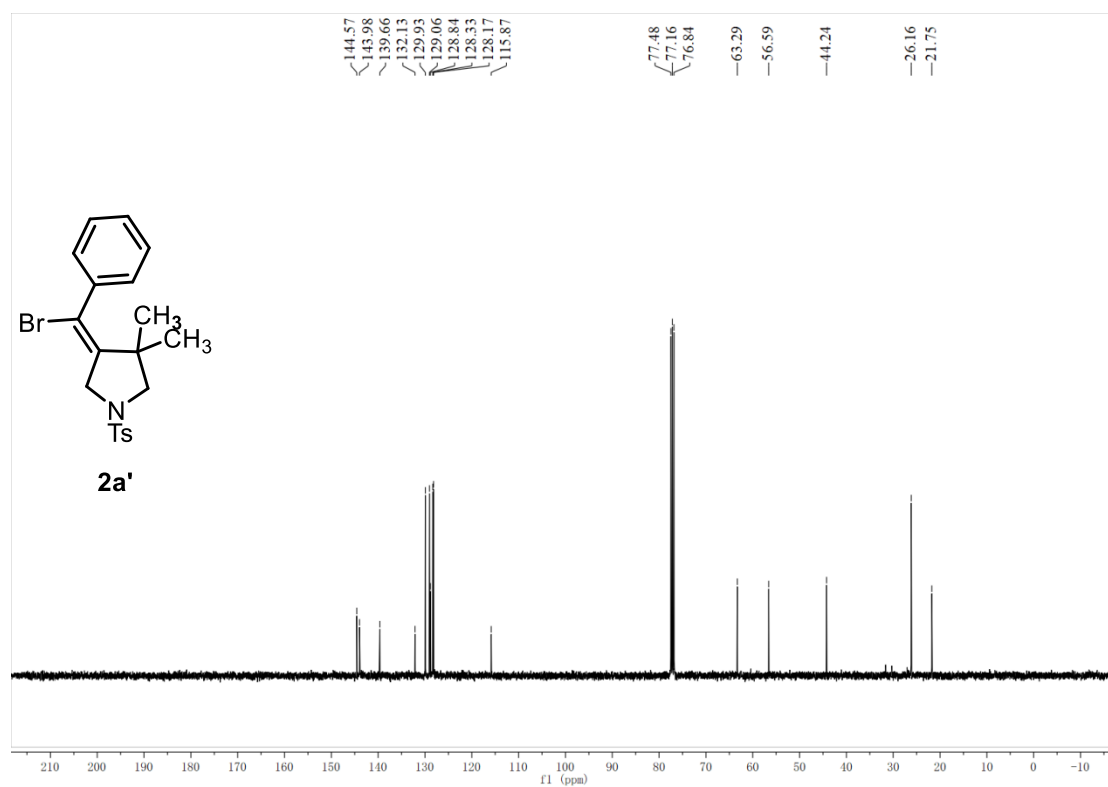

$^1\text{H}$  NMR of **7** (600 MHz,  $\text{CDCl}_3$ )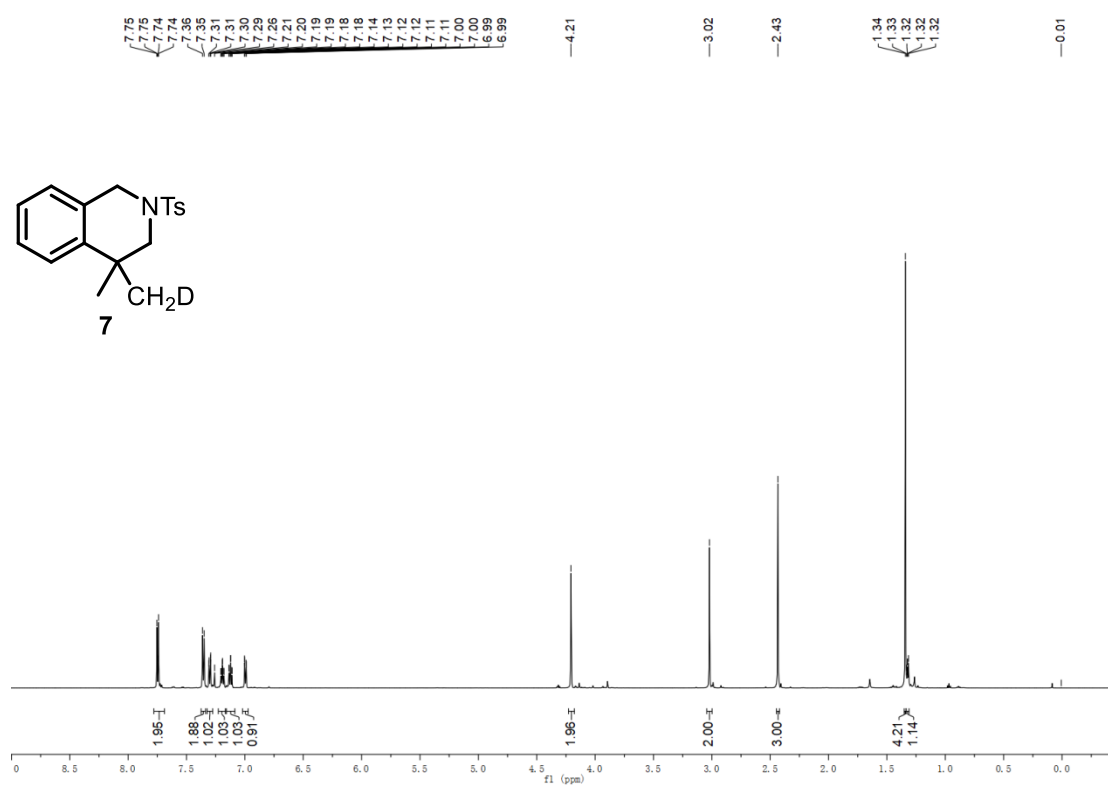 $^{13}\text{C}$  NMR of **7** (101 MHz,  $\text{CDCl}_3$ )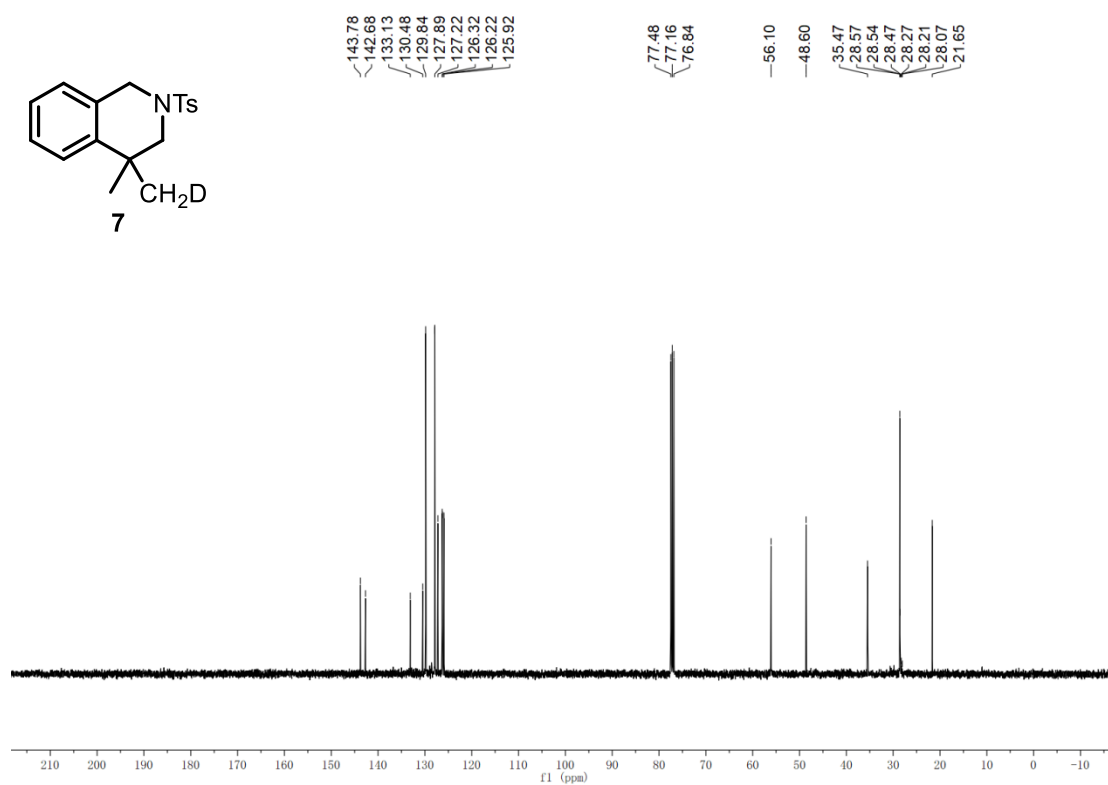

Supplement: d3ob01778h1.pdf [file d3ob01778h1.pdf]
